# Supplementary material for: In vitro identification of oridonin hybrids as potential anti-TNBC agents inducing cell cycle arrest and apoptosis by regulation of p21, γH2AX and cleaved PARP
Source: Royal Society of Chemistry journal article supplement (doi:10.1039/d4md00580e), 2024-01-01
Supplement: d4md00580e2.pdf [file d4md00580e2.pdf]

*Supporting Information for*

***In Vitro* Identification of Oridonin Hybrids as Potential Anti-TNBC  
Agents inducing Cell Cycle Arrest and Apoptosis by Regulation of  
p21,  $\gamma$ H2AX and Cleaved PARP**

Jinhua Ning,<sup>1‡</sup> Nini Zhan,<sup>1‡</sup> Zhanpan Wu,<sup>1</sup> Yuzhe Li,<sup>1</sup> Die Zhang,<sup>1</sup> Yadian Shi,<sup>1</sup> Yingxun Zhou,<sup>1</sup>

Chuan-Huizi Chen,<sup>\*1</sup> and Wenbin Jin<sup>\*1</sup>.

<sup>1</sup> Key Laboratory of External Drug Delivery System and Preparation Technology in Universities  
of Yunnan and Faculty of Chinese Materia Medica, Yunnan University of Chinese Medicine,  
Kunming, Yunnan, China

<sup>‡</sup>These authors contributed equally.

\*Corresponding authors: Wenbin Jin and Chuan-Huizi Chen

For W. B. J., email: 14900326r@connect.polyu.hk

For C.H.Z C., email: huizipurple@163.com

## Table of Content

|                       |                                                                                    |
|-----------------------|------------------------------------------------------------------------------------|
| <b>Figure S1-S36</b>  | <b><math>^1\text{H}</math> and <math>^{13}\text{C}</math> spectra of compounds</b> |
| <b>Figure S37-S69</b> | <b>HRMS spectra of compounds</b>                                                   |
| <b>Figure S70-S72</b> | <b>HPLC-purity spectra of compounds</b>                                            |
| <b>Table S1</b>       | <b>Plasma stability of oridonin and compound 11a</b>                               |

**Figure S1.**  $^1\text{H}$  and  $^{13}\text{C}$  NMR spectra of **5,6,14-trihydroxy-4,4-dimethyl-8-methylenedecahydro-1H-6,11b-(epoxymethano)-6a,9-methanocyclohepta[a]naphthalene-1,7(8H)-dione (1)**

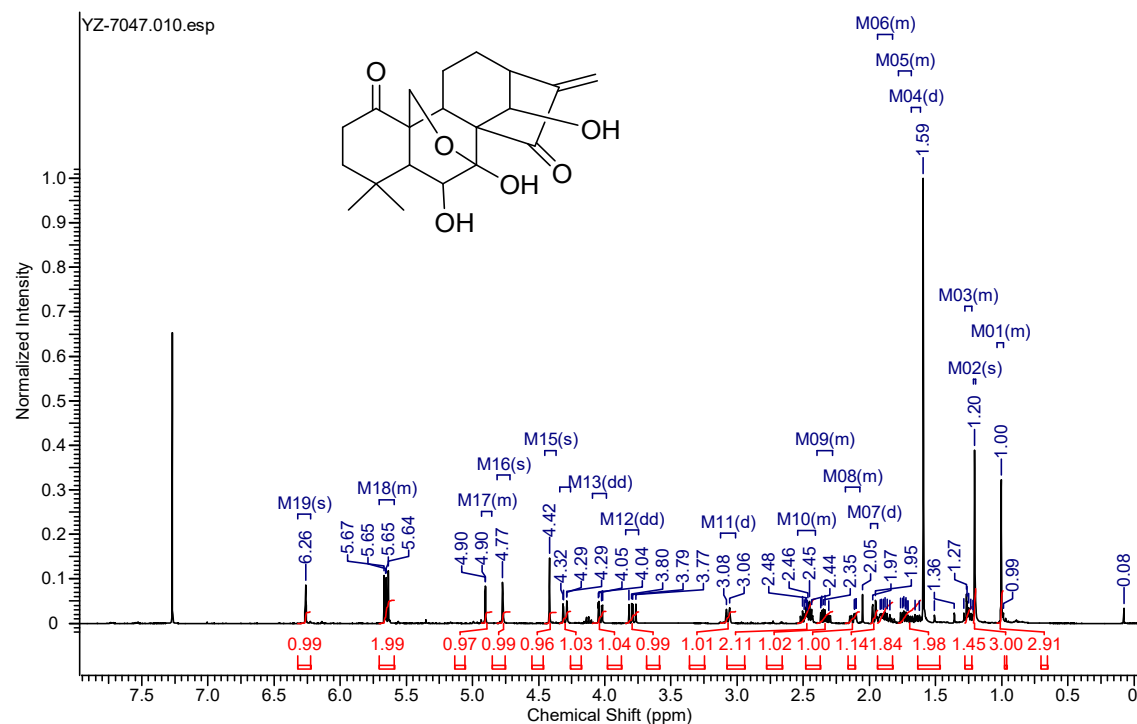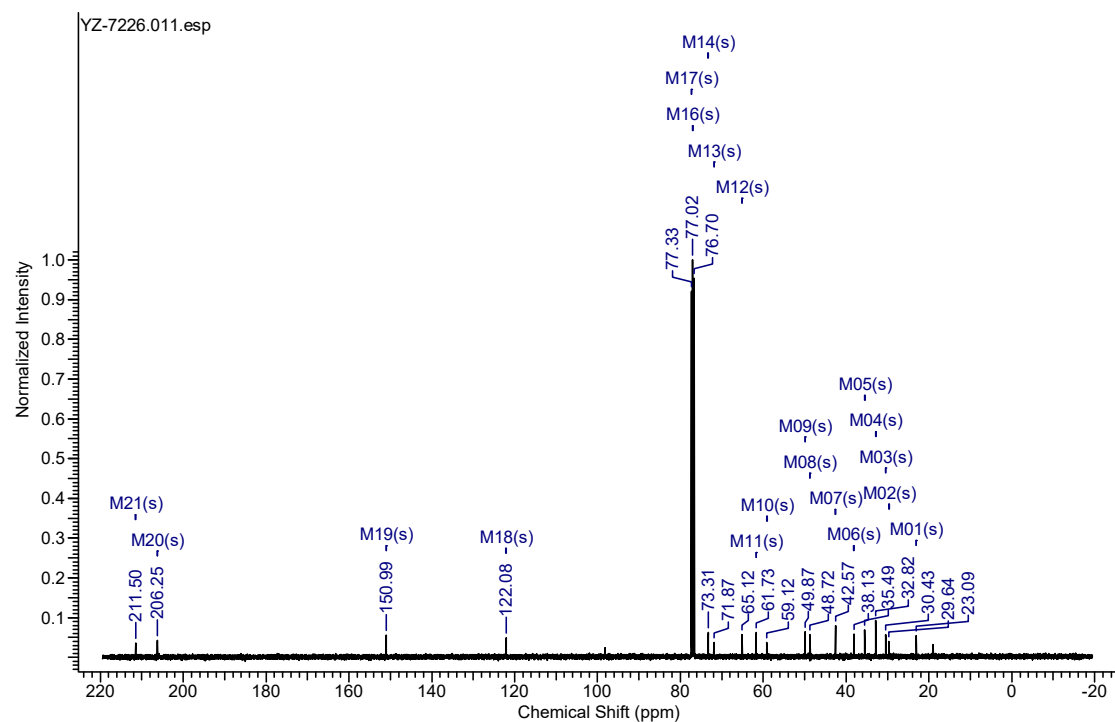

**Figure S2.**  $^1\text{H}$  and  $^{13}\text{C}$  NMR spectra of **5,6-dihydroxy-4,4-dimethyl-8-methylene-1,7-dioxododecahydro-1H-6,11b-(epoxymethano)-6a,9-methanocyclohepta[a]naphthalen-14-yl 2-(3,4,5-trimethoxyphenyl)acetate (1a)**

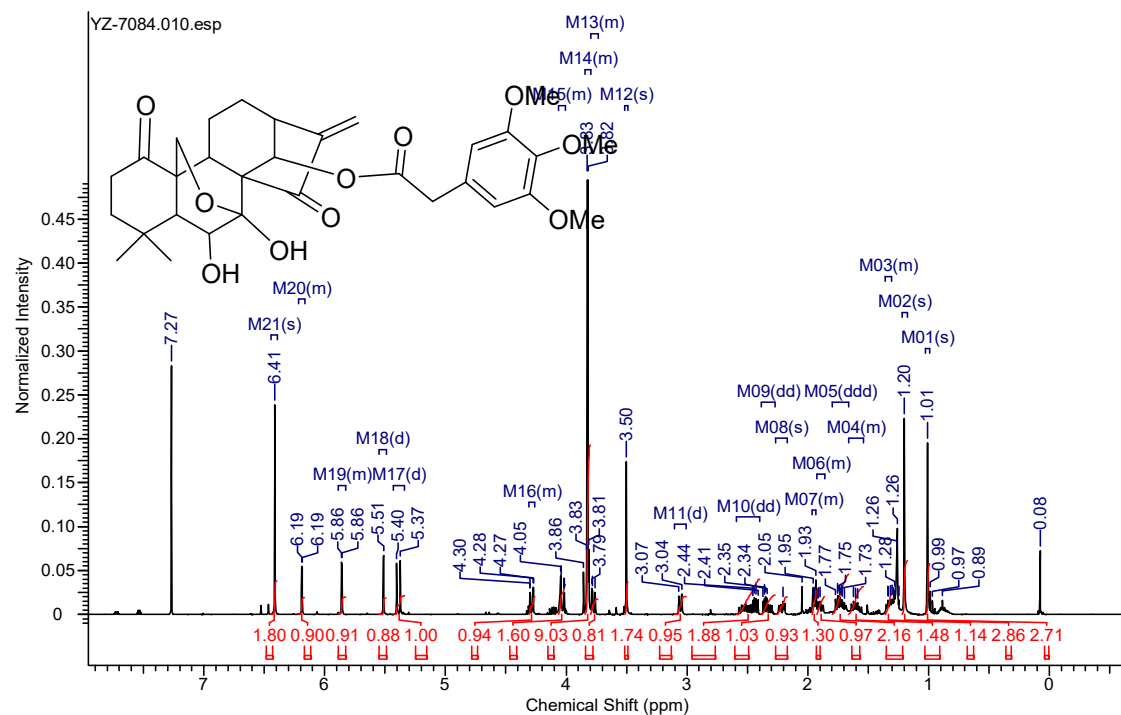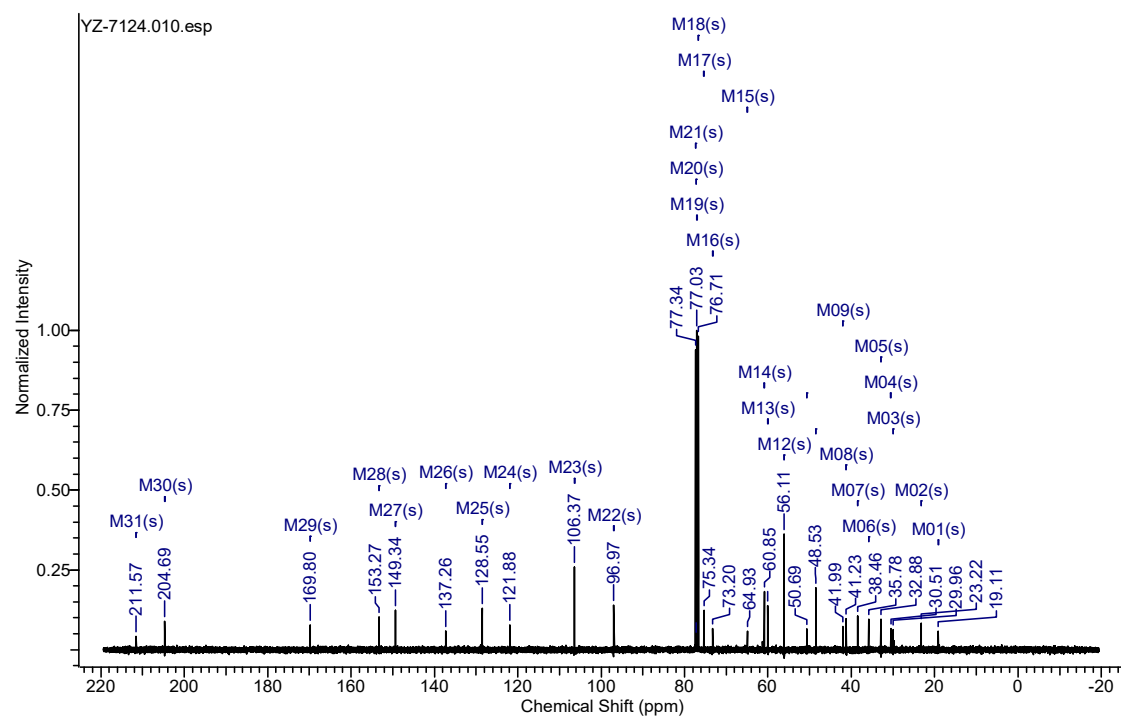



**Figure S3.**  $^1\text{H}$  and  $^{13}\text{C}$  NMR spectra of **5,6-dihydroxy-4,4-dimethyl-8-methylene-1,7-dioxododecahydro-1H-6,11b-(epoxymethano)-6a,9-methanocyclohepta[a]naphthalen-14-yl 2-(3,4-dimethoxyphenyl)acetate (1b)**

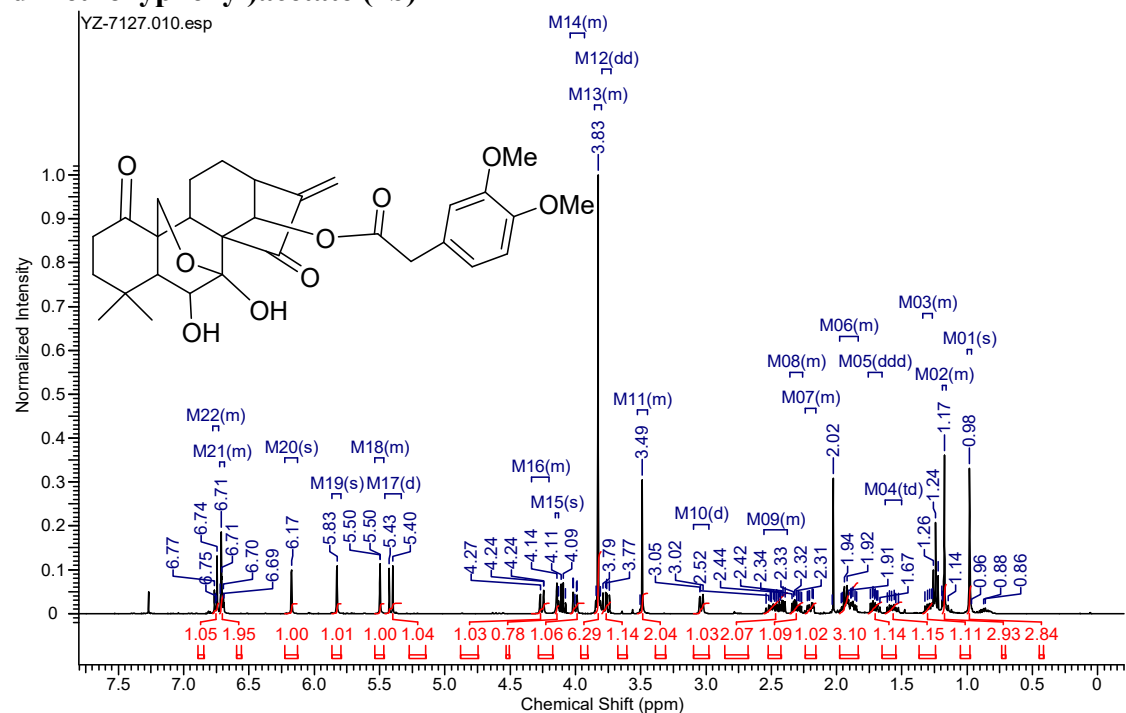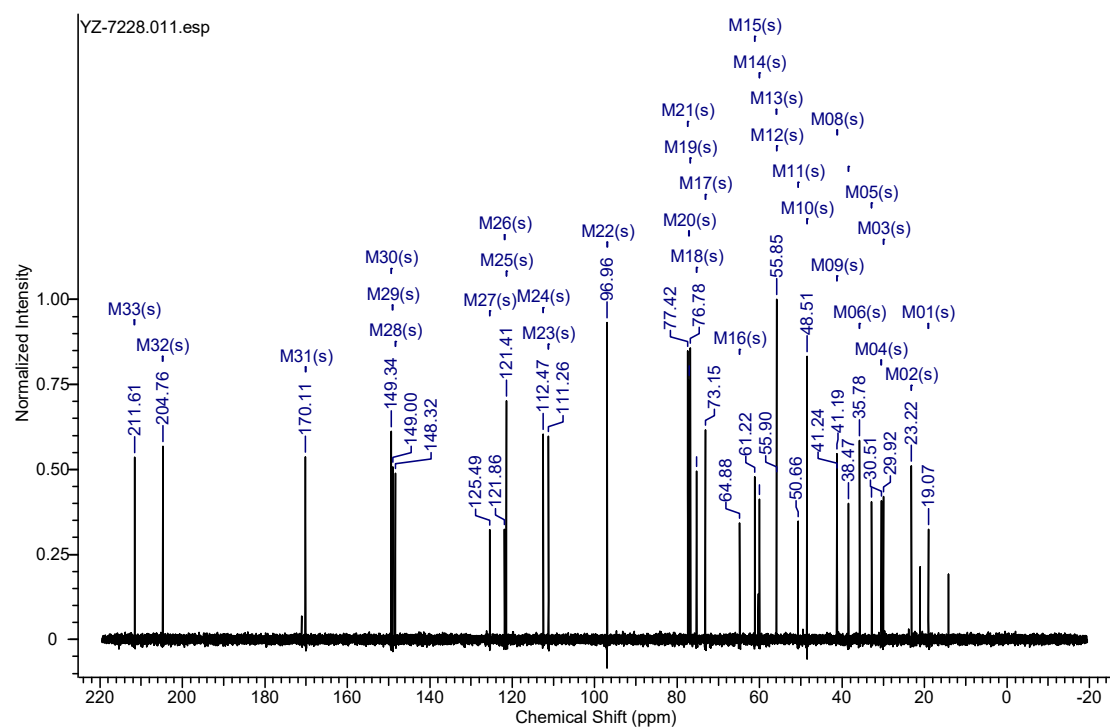



**Figure S4.**  $^1\text{H}$  and  $^{13}\text{C}$  NMR spectra of **5,6-dihydroxy-4,4-dimethyl-8-methylene-1,7-dioxododecahydro-1H-6,11b-(epoxymethano)-6a,9-methanocyclohepta[a]naphthalen-14-yl 2-(4-methoxyphenyl)acetate (1c)**

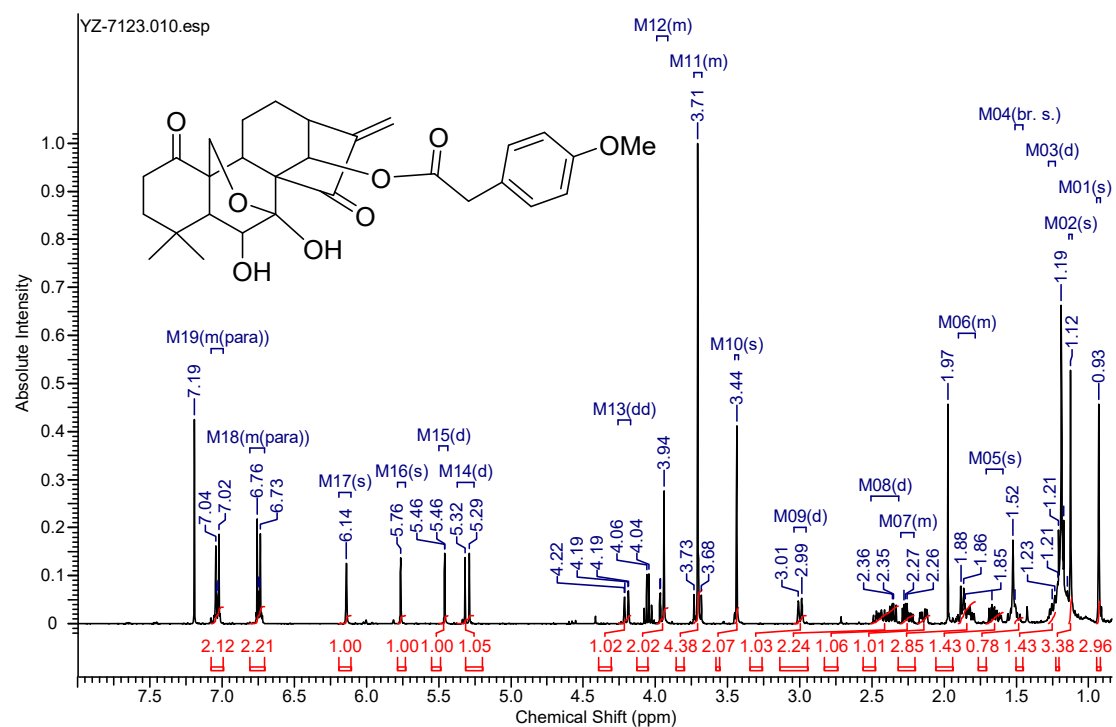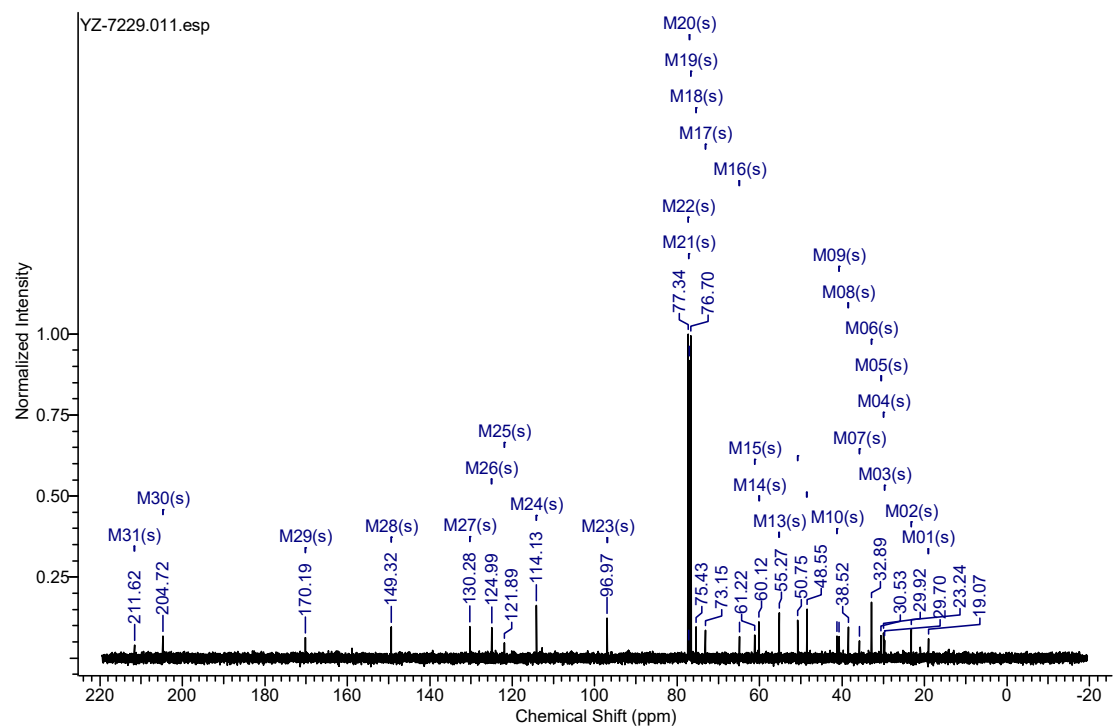



**Figure S5.**  $^1\text{H}$  and  $^{13}\text{C}$  NMR spectra of **5,6-dihydroxy-4,4-dimethyl-8-methylene-1,7-dioxododecahydro-1H-6,11b-(epoxymethano)-6a,9-methanocyclohepta[a]naphthalen-14-yl 2-(2-bromophenyl)acetate (1d)**

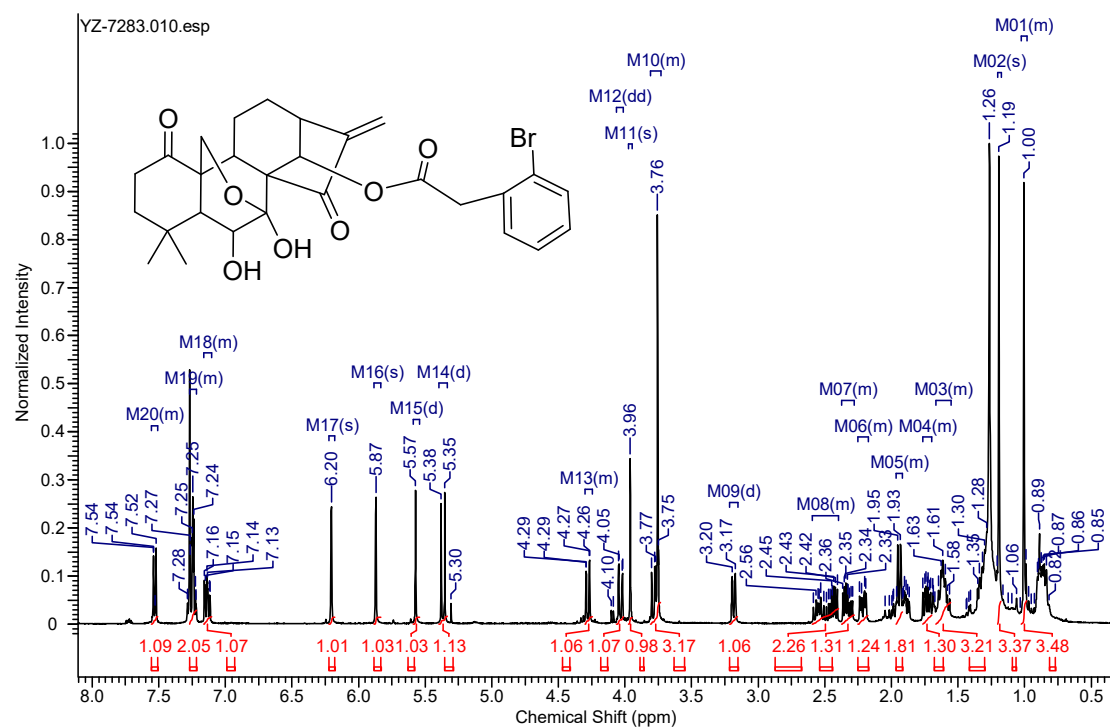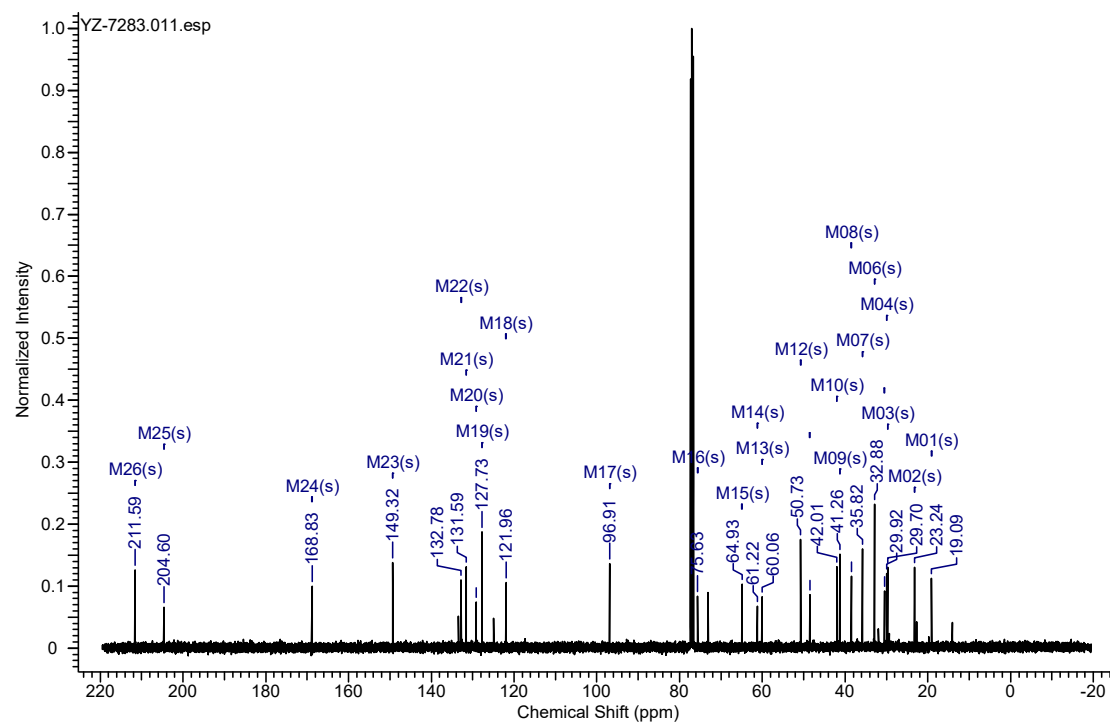

**Figure S6.**  $^1\text{H}$  and  $^{13}\text{C}$  NMR spectra of **5,6-dihydroxy-4,4-dimethyl-8-methylene-1,7-dioxododecahydro-1H-6,11b-(epoxymethano)-6a,9-methanocyclohepta[a]naphthalen-14-yl 4-(bis(2-chloroethyl)amino)benzoate (1e)**

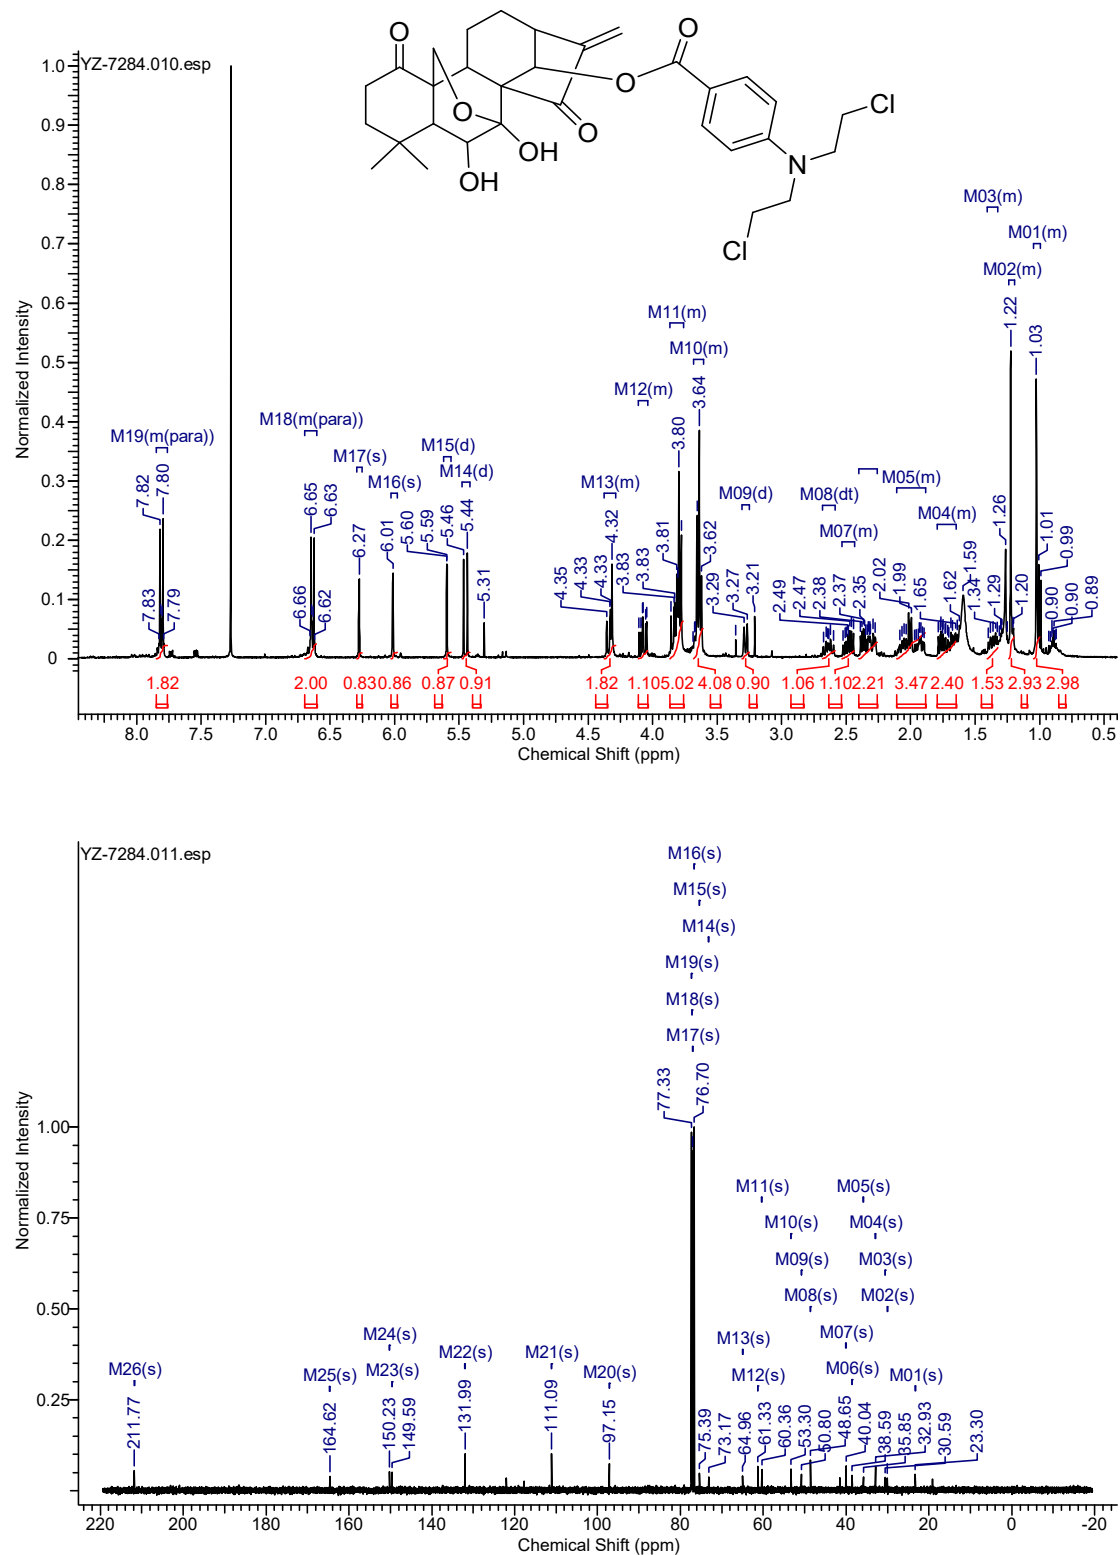

**Figure S7.**  $^1\text{H}$  and  $^{13}\text{C}$  NMR spectra of **5,6-dihydroxy-4,4-dimethyl-8-methylene-1,7-dioxododecahydro-1H-6,11b-(epoxymethano)-6a,9-methanocyclohepta[a]naphthalen-14-yl 2-(4-(bis(2-chloroethyl)amino)phenyl)acetate (1f)**

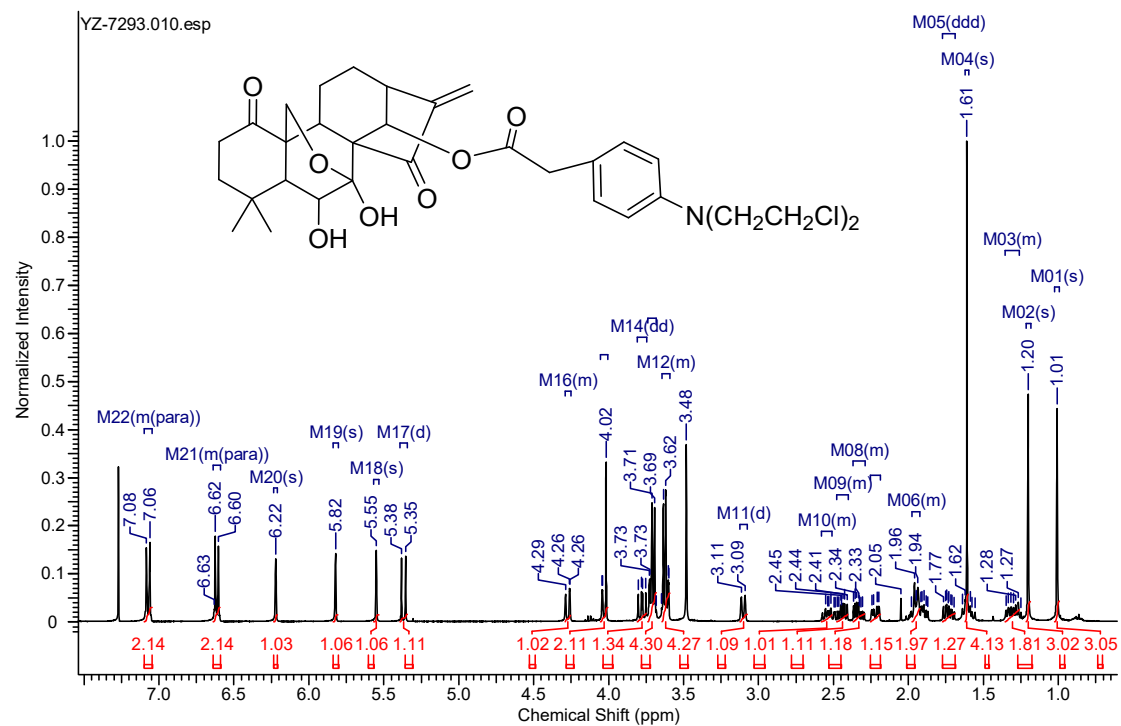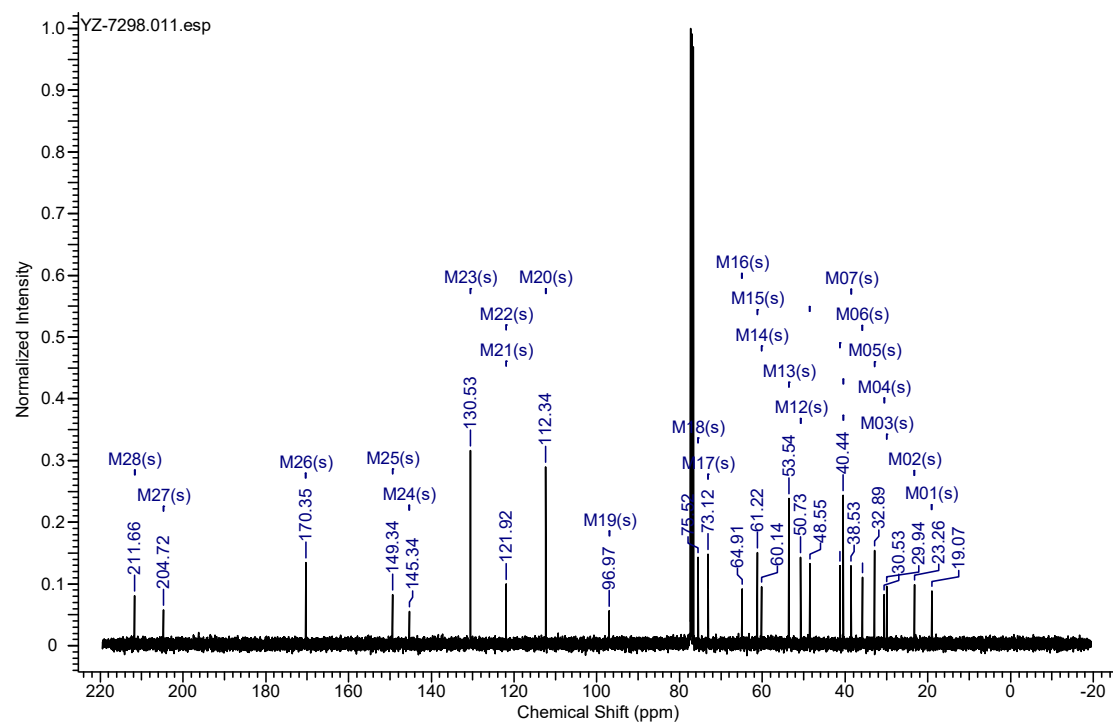

**Figure S8.**  $^1\text{H}$  and  $^{13}\text{C}$  NMR spectra of **5,6-dihydroxy-4,4-dimethyl-8-methylene-1,7-dioxododecahydro-1H-6,11b-(epoxymethano)-6a,9-methanocyclohepta[a]naphthalen-14-yl adamantane-1-carboxylate (1g)**

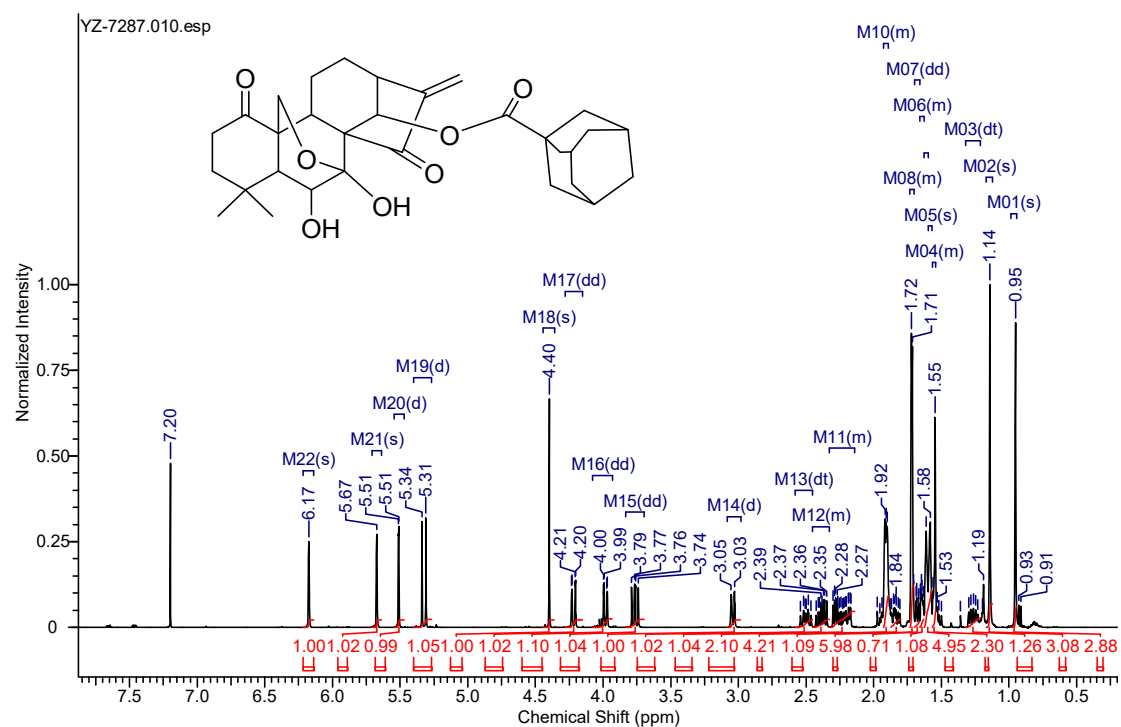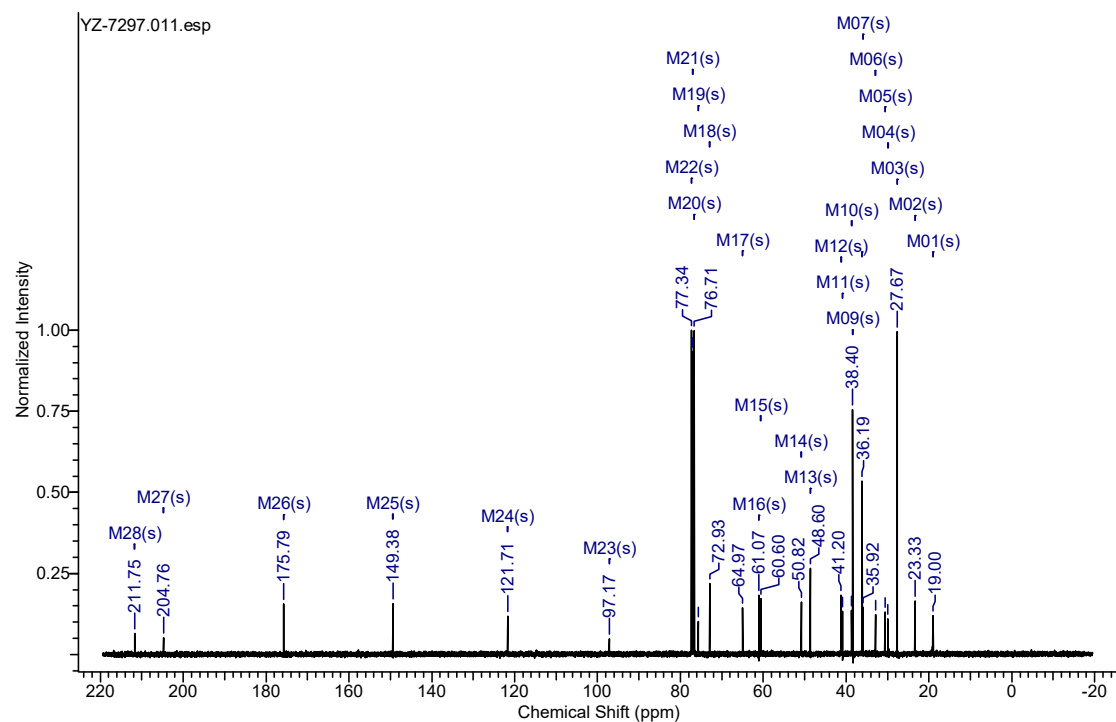

**Figure S9.**  $^1\text{H}$  and  $^{13}\text{C}$  NMR spectra of **5,6-dihydroxy-4,4-dimethyl-8-methylene-1,7-dioxododecahydro-1H-6,11b-(epoxymethano)-6a,9-methanocyclohepta[a]naphthalen-14-yl (E)-3-(4-(dimethylamino)phenyl)acrylate (1h)**

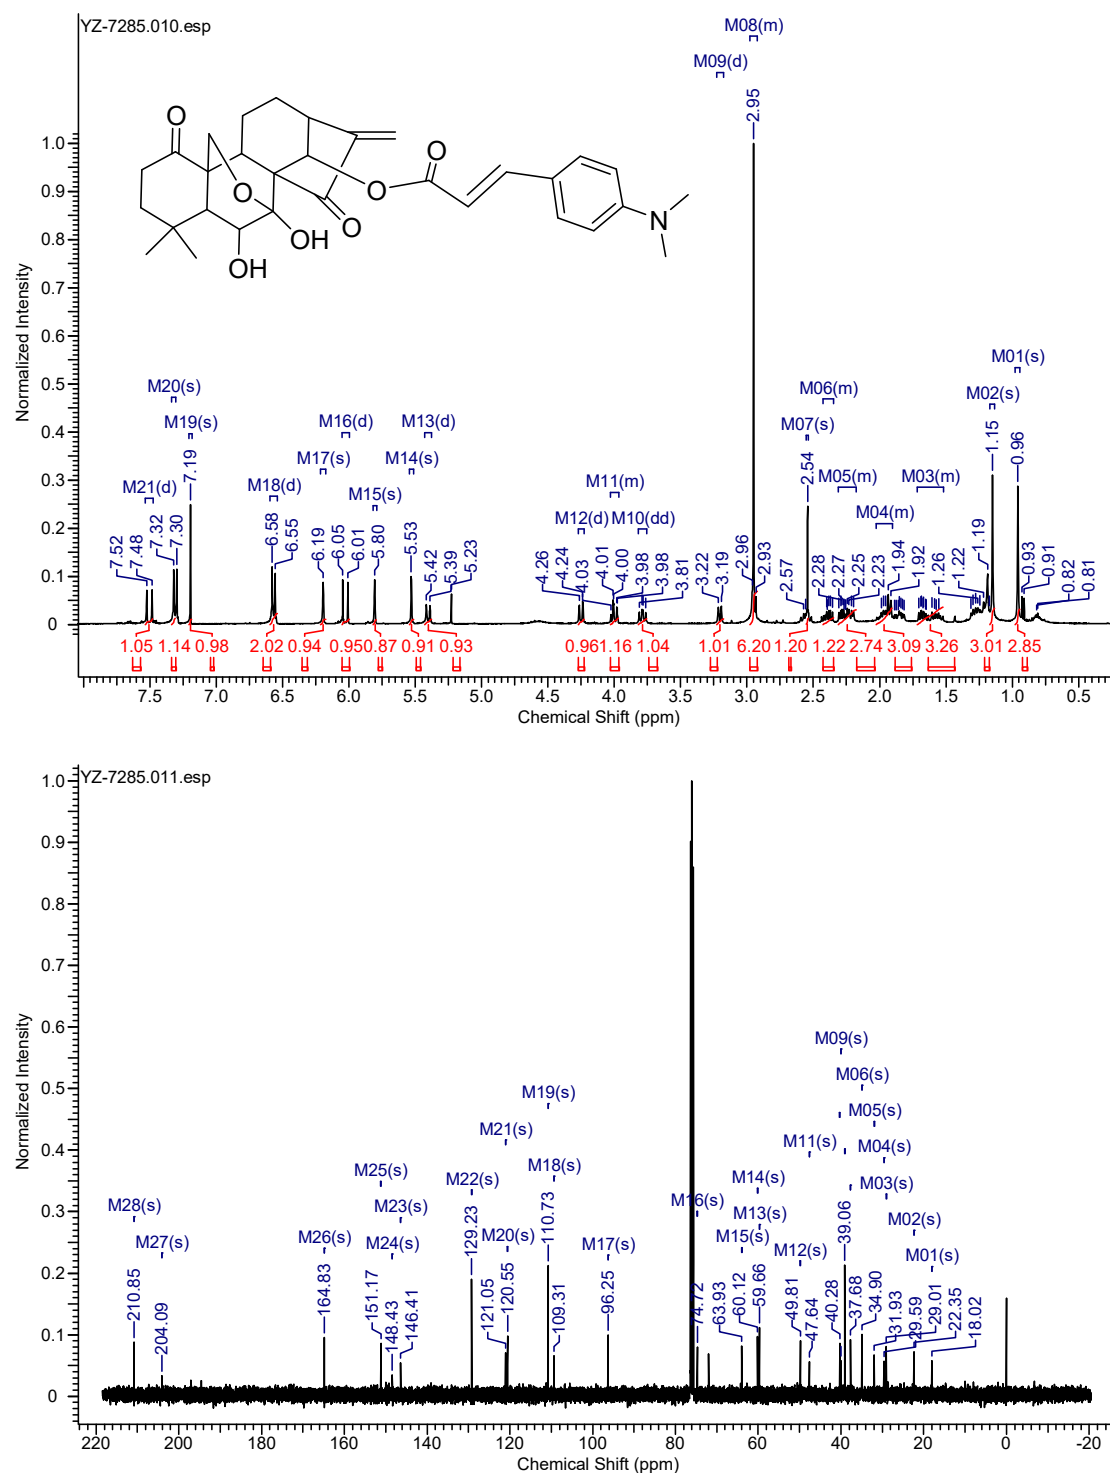

**Figure S10.**  $^1\text{H}$  and  $^{13}\text{C}$  NMR spectra of **4,4-dimethyl-8-methylene-1,6,7-trioxadodecahydro-1H-5,11b-(epoxymethano)-6a,9-methanocyclohepta[a]naphthalen-14-yl 2-(3,4,5-trimethoxyphenyl)acetate (2a)**

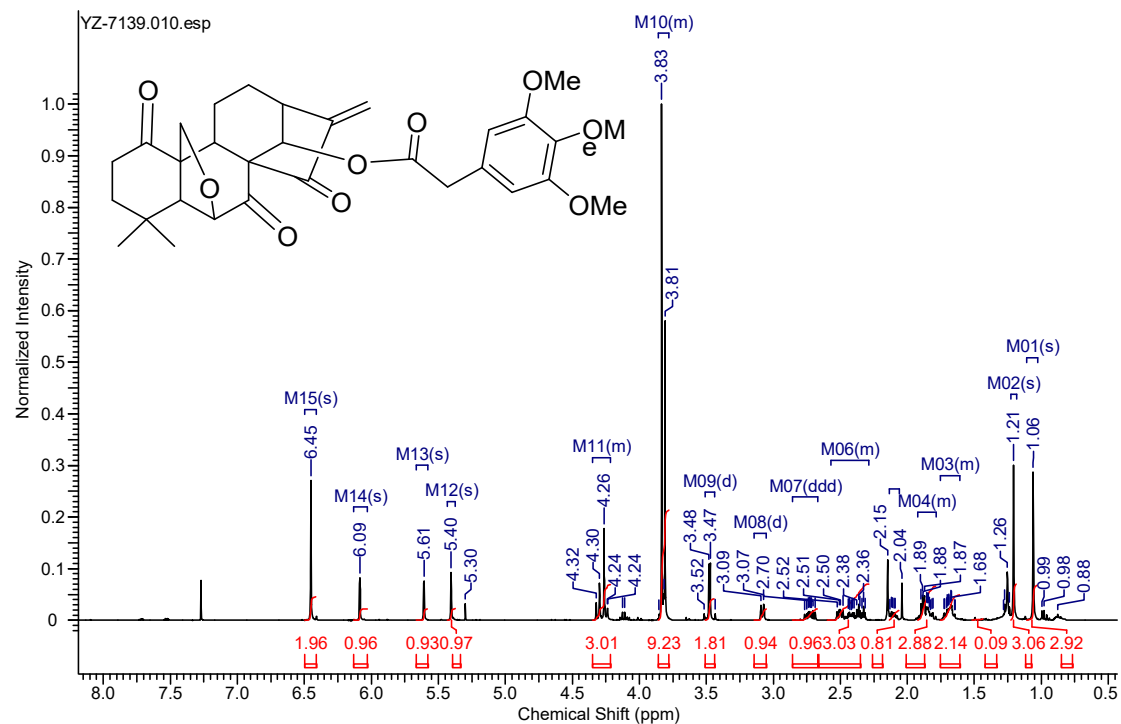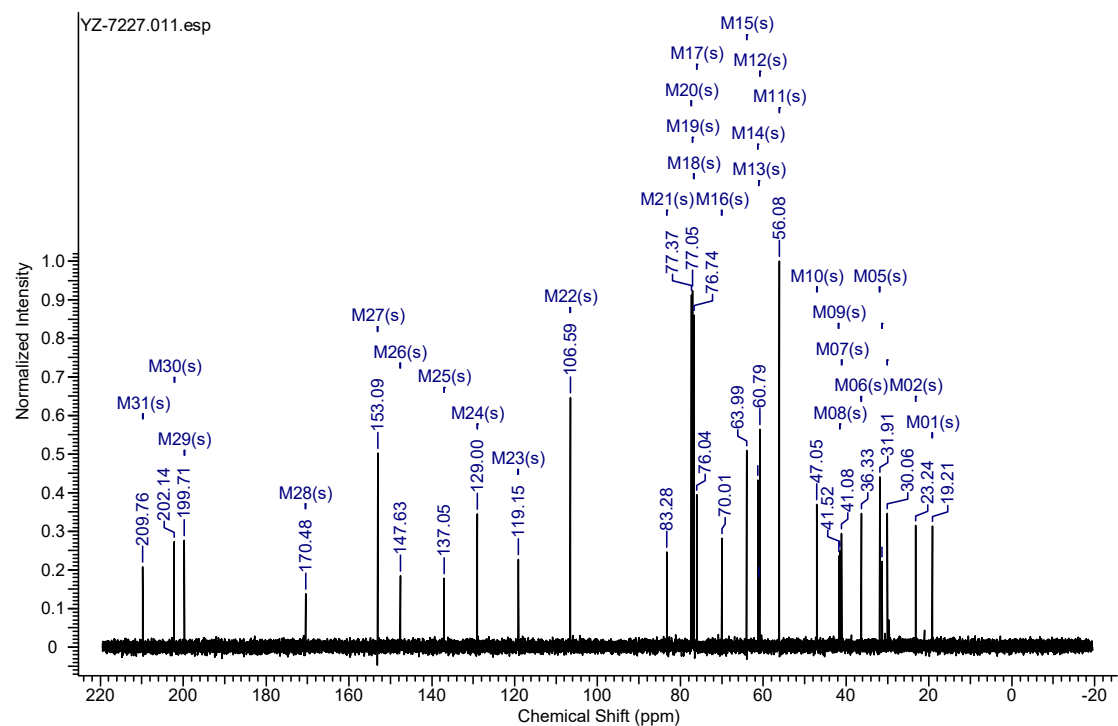

**Figure S11.**  $^1\text{H}$  and  $^{13}\text{C}$  NMR spectra of **4,4-dimethyl-8-methylene-1,6,7-trioxadodecahydro-1H-5,11b-(epoxymethano)-6a,9-methanocyclohepta[a]naphthalen-14-yl 2-(3,4-dimethoxyphenyl)acetate (2b)**

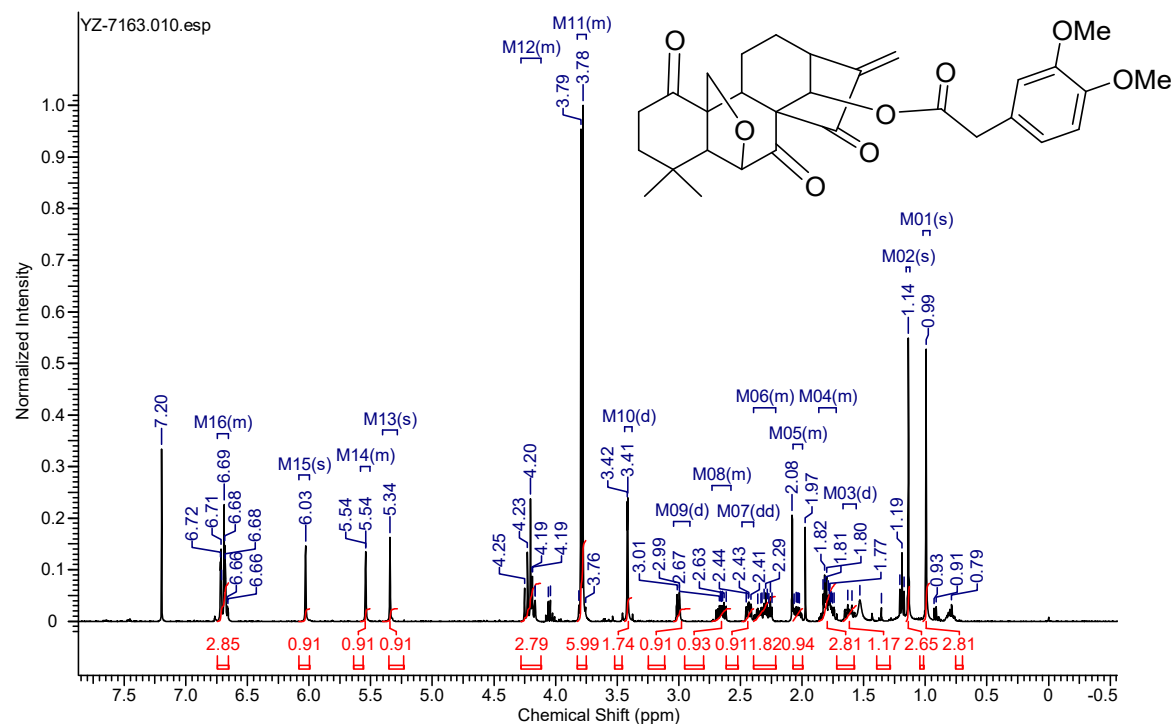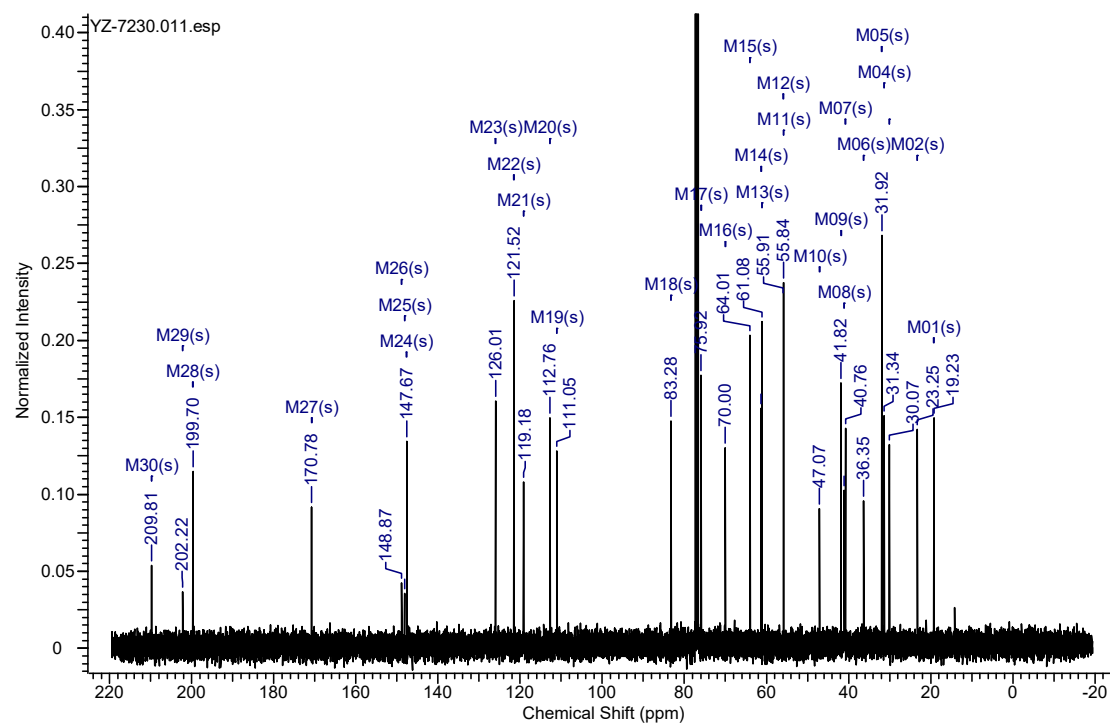

**Figure S12.**  $^1\text{H}$  and  $^{13}\text{C}$  NMR spectra of **4,4-dimethyl-8-methylene-1,6,7-trioxododecahydro-1H-5,11b-(epoxymethano)-6a,9-methanocyclohepta[a]naphthalen-14-yl 2-(4-methoxyphenyl)acetate (2c)**

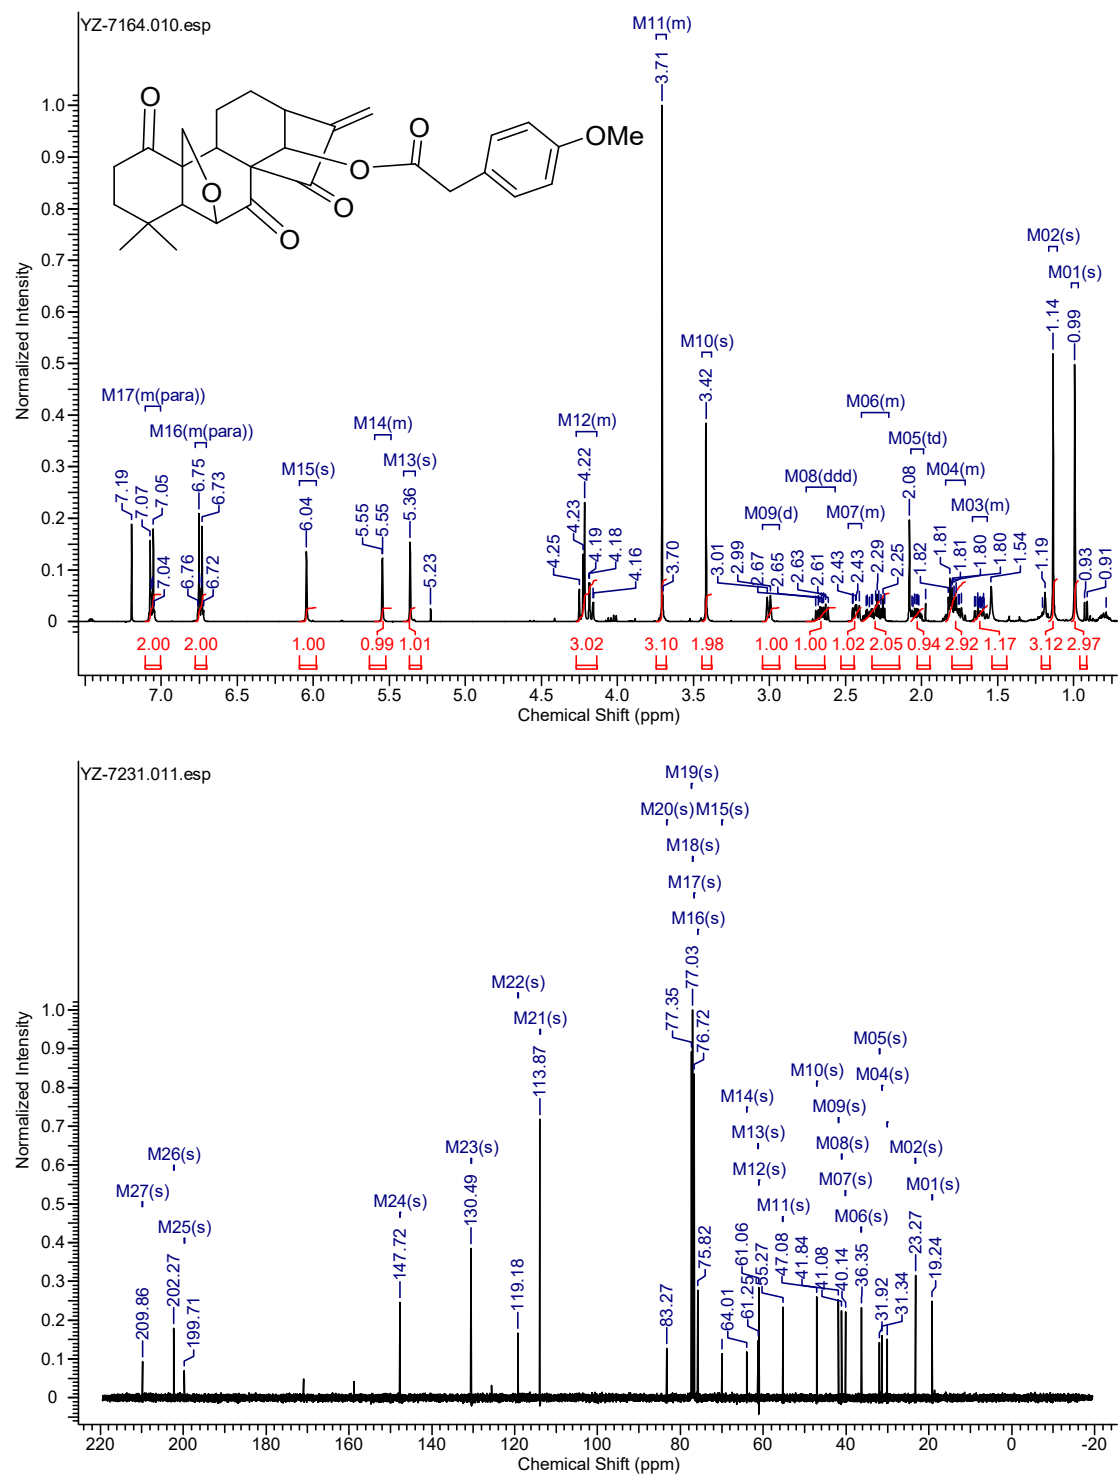



**Figure S13.**  $^1\text{H}$  and  $^{13}\text{C}$  NMR spectra of **4,4-dimethyl-8-methylene-1,6,7-trioxadodecahydro-1H-5,11b-(epoxymethano)-6a,9-methanocyclohepta[a]naphthalen-14-yl 2-(2-bromophenyl)acetate (2d)**

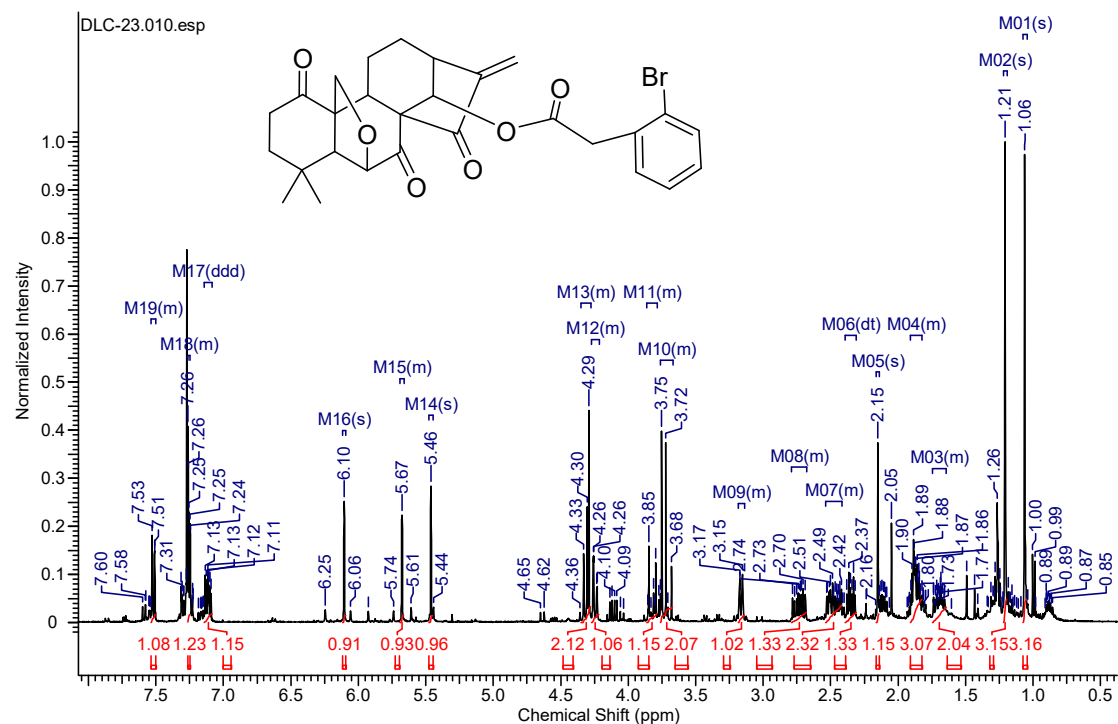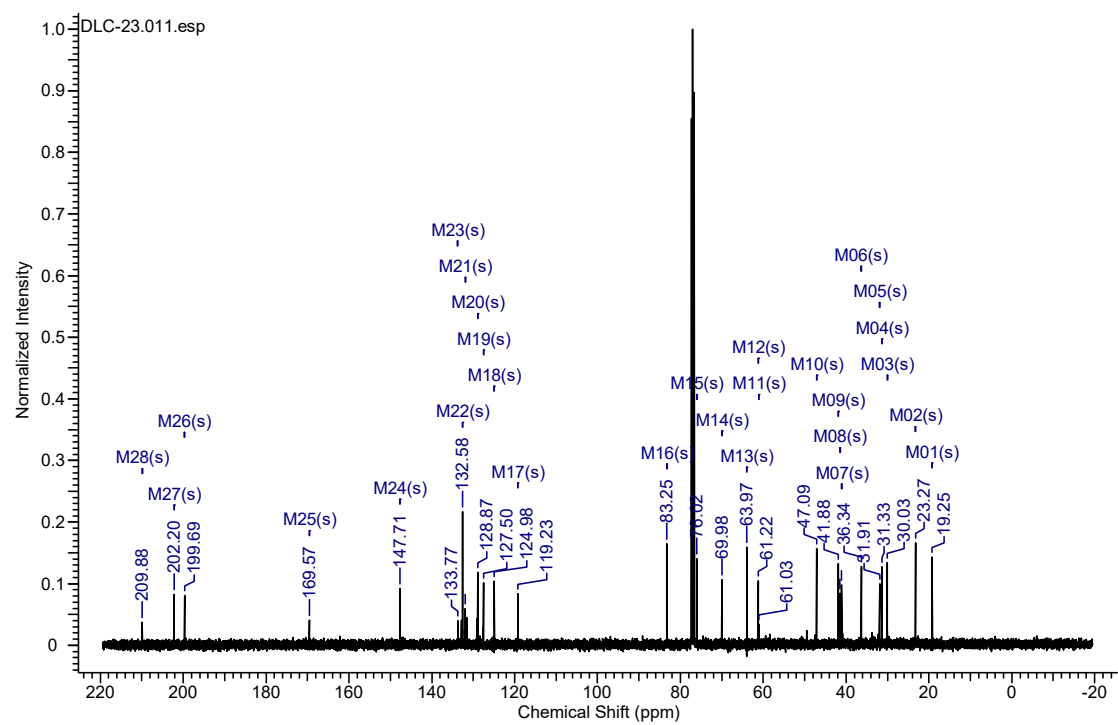

**Figure S14.**  $^1\text{H}$  and  $^{13}\text{C}$  NMR spectra of **4,4-dimethyl-8-methylene-1,6,7-trioxadodecahydro-1H-5,11b-(epoxymethano)-6a,9-methanocyclohepta[a]naphthalen-14-yl 4-(bis(2-chloroethyl)amino)benzoate (2e)**

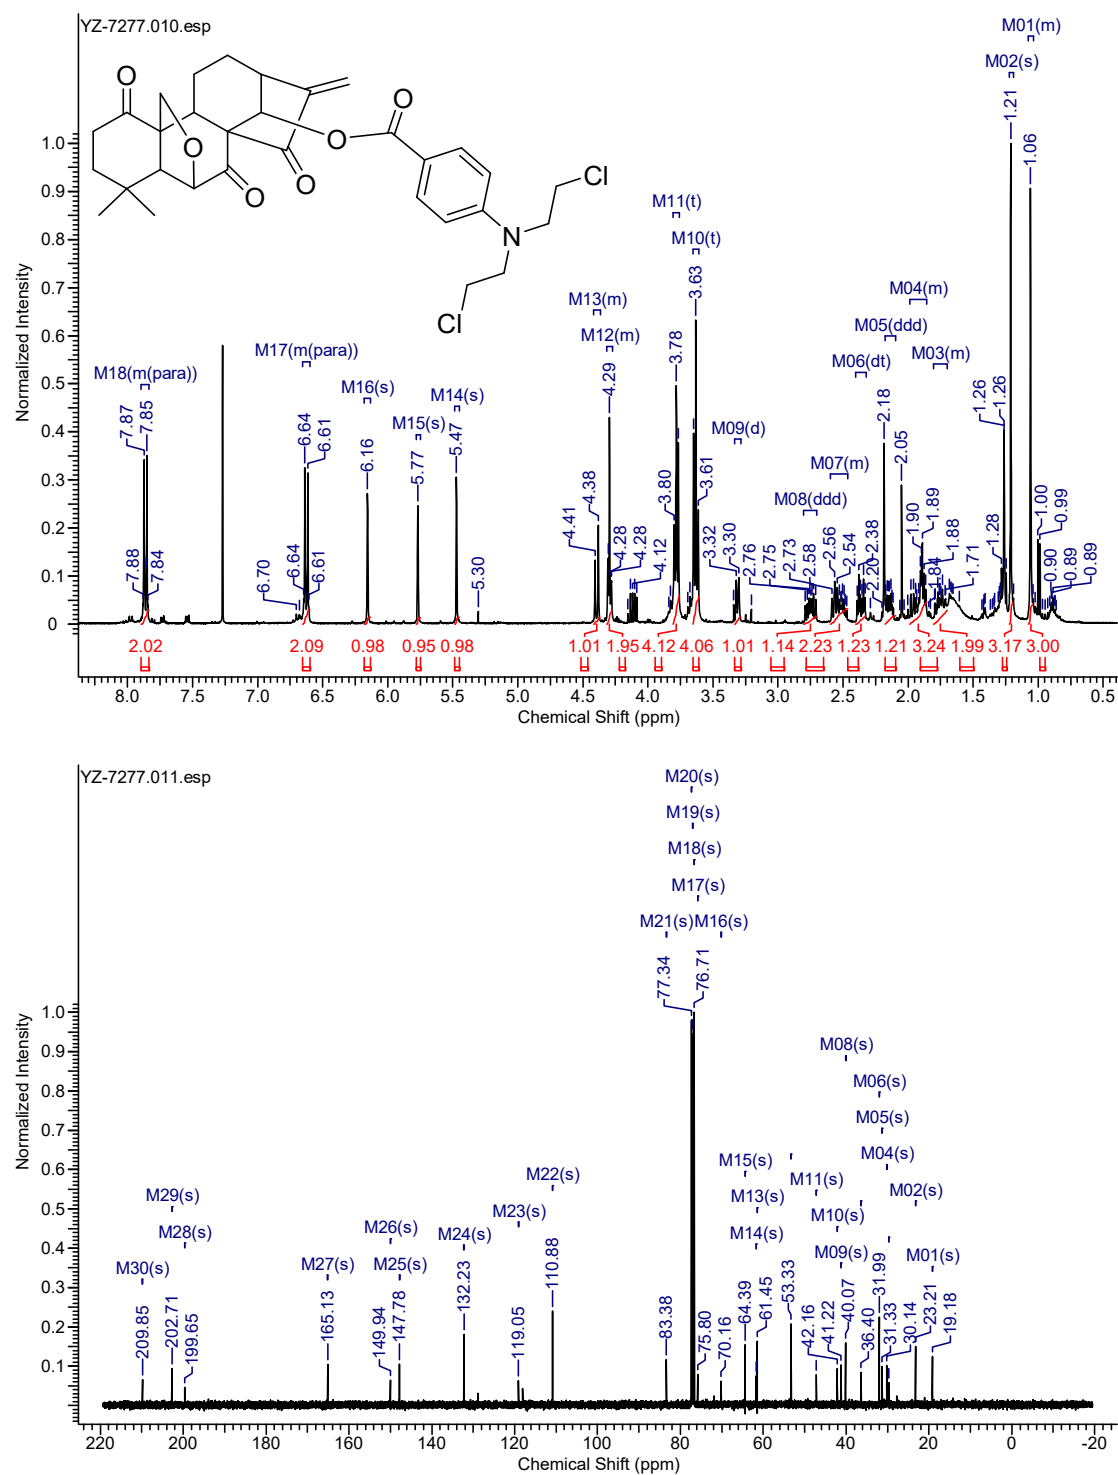

**Figure S15.**  $^1\text{H}$  and  $^{13}\text{C}$  NMR spectra of **4,4-dimethyl-8-methylene-1,6,7-trioxadodecahydro-1H-5,11b-(epoxymethano)-6a,9-methanocyclohepta[a]naphthalen-14-yl 2-(4-(bis(2-chloroethyl)amino)phenyl)acetate (2f)**

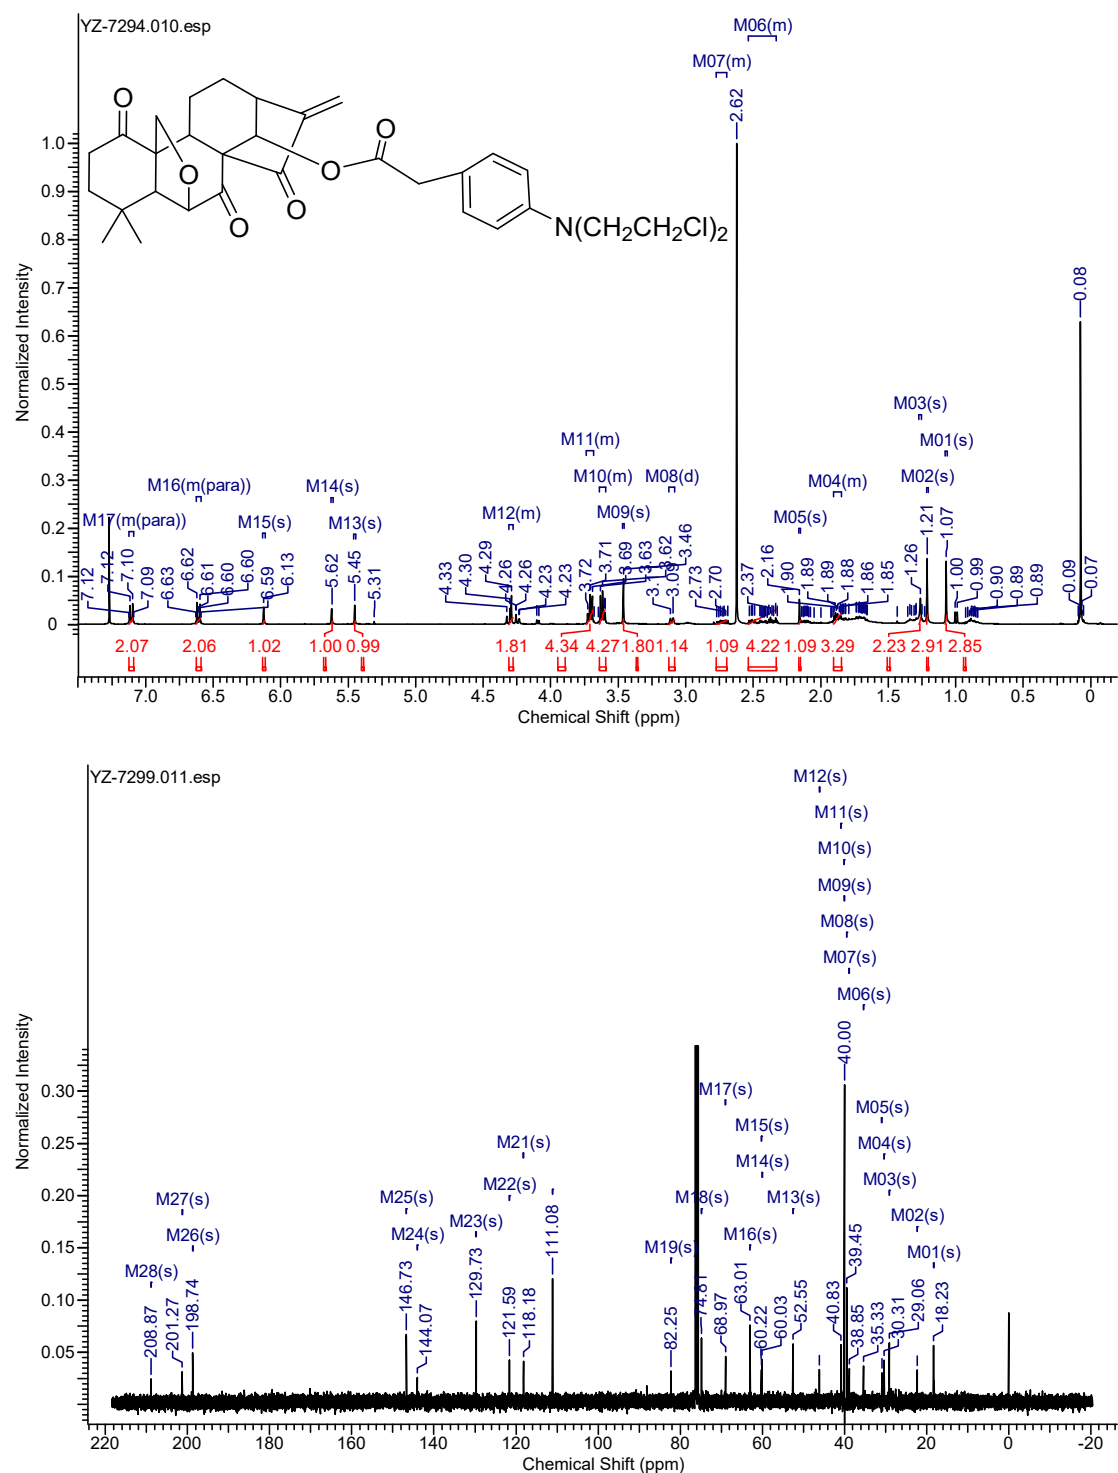

**Figure S16.**  $^1\text{H}$  and  $^{13}\text{C}$  NMR spectra of **4,4-dimethyl-8-methylene-1,6,7-trioxadodecahydro-1H-5,11b-(epoxymethano)-6a,9-methanocyclohepta[a]naphthalen-14-yl adamantane-1-carboxylate (2g)**

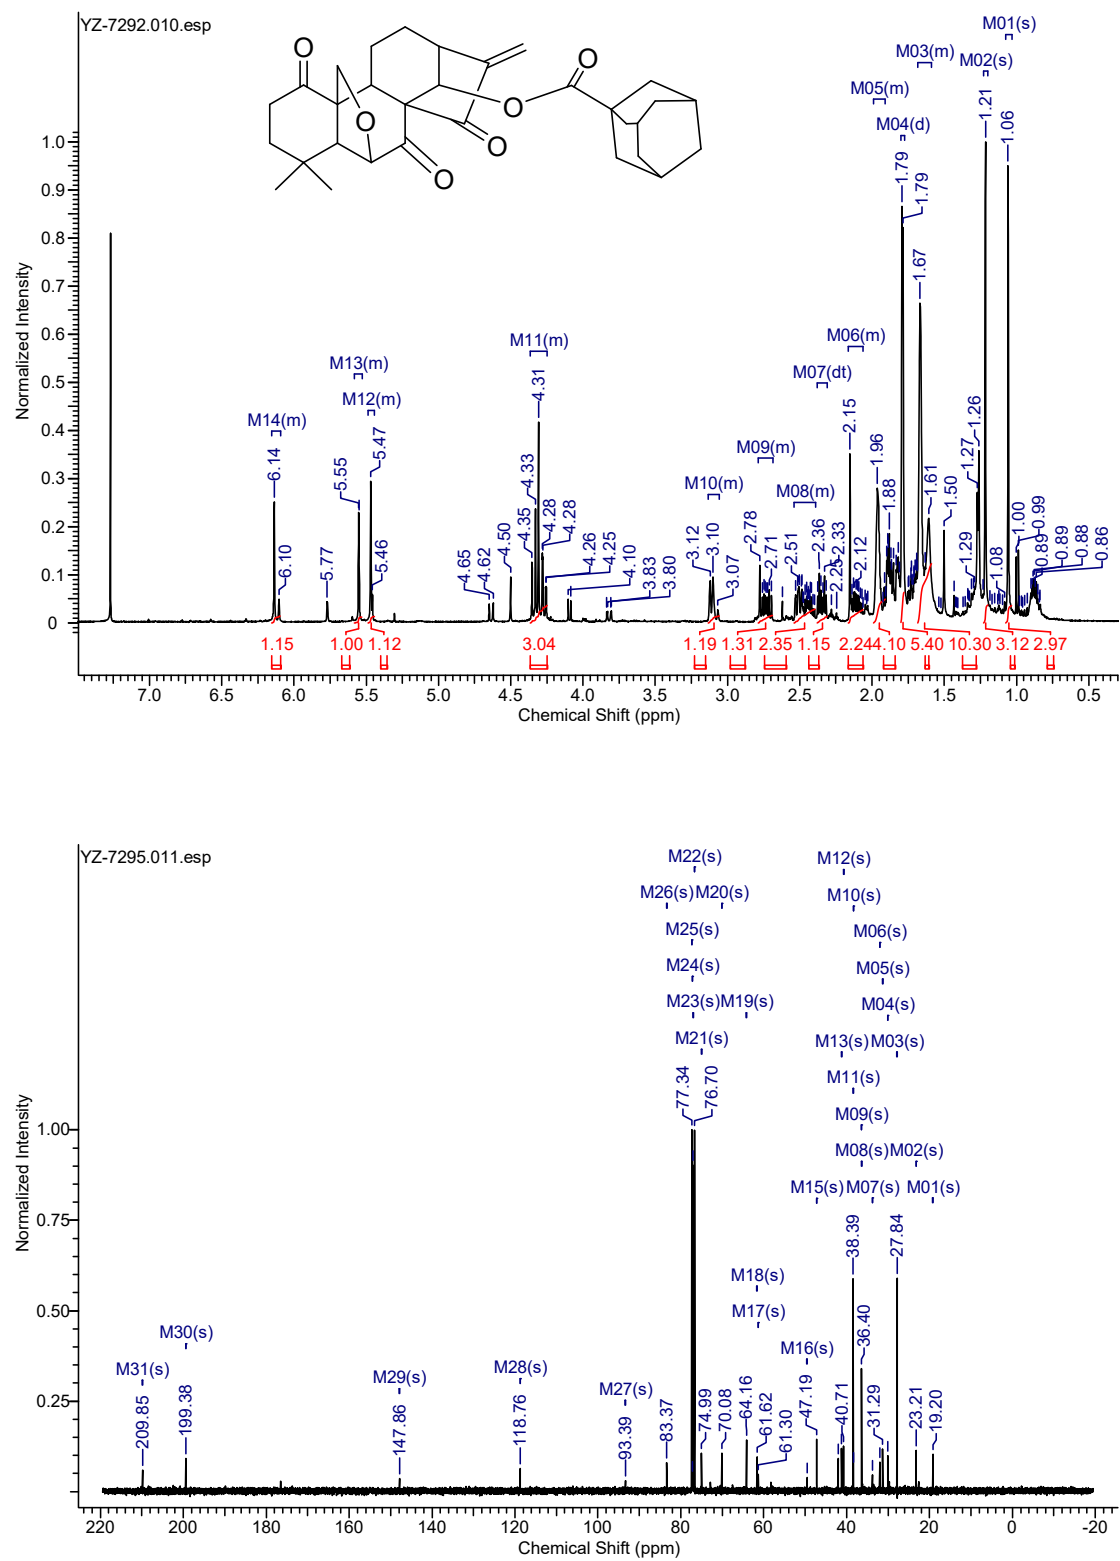

**Figure S17.**  $^1\text{H}$  NMR spectra of **(3S,3aR,3a1R,6aS,7S,11S,11aS)-7,11-dihydroxy-5,5,8,8-tetramethyl-15-methylenedecahydro-2H-6a,11a-(epoxymethano)-3,3a1-ethanophenanthro[1,10-de][1,3]dioxin-14-one (3)**

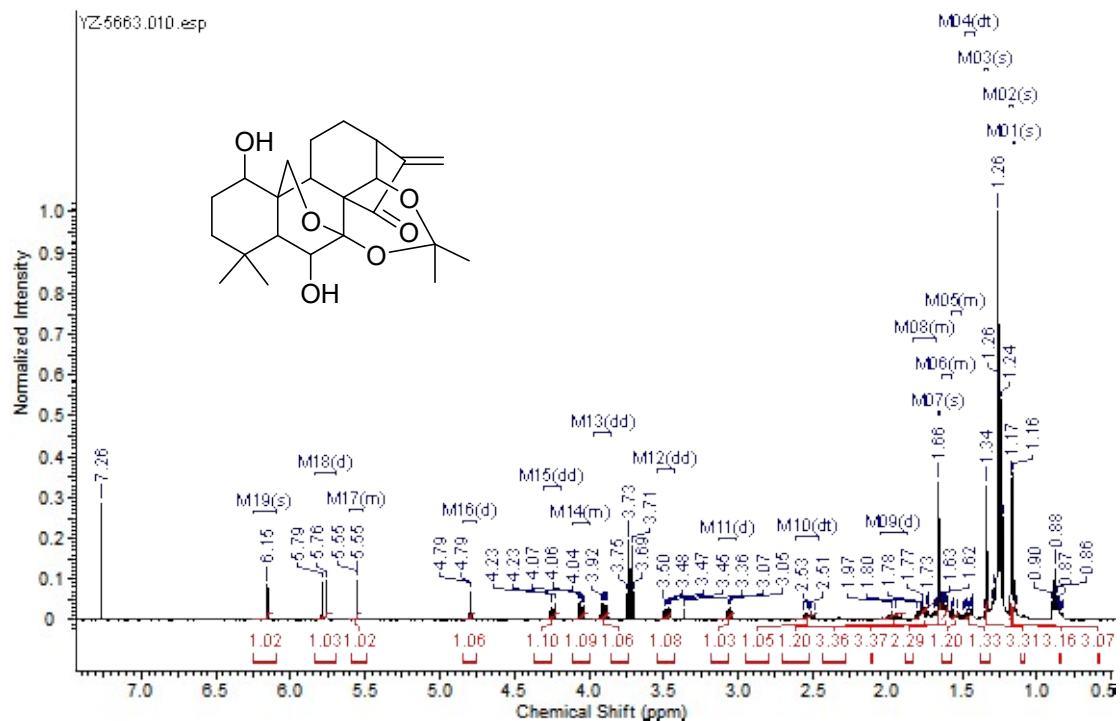

**Figure S18.**  $^1\text{H}$  NMR spectra of  
**(3S,3aR,3a1R,6aS,7S,11S,11aS)-7-hydroxy-5,5,8,8-tetramethyl-15-methylene-14-oxodecahydro-2H-6a,11a-(epoxymethano)-3,3a1-ethanophenanthro[1,10-de][1,3]dioxin-11-yl methanesulfonate (4)**

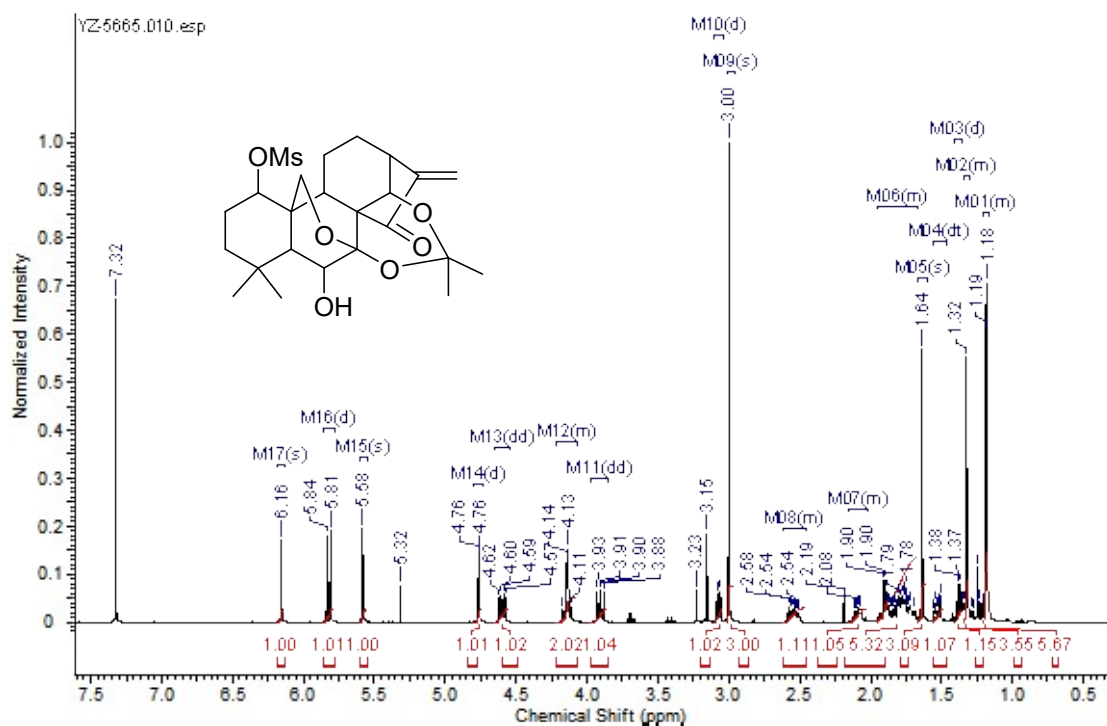

**Figure S19.**  $^1\text{H}$  NMR spectra of  
**(3S,3aR,3a1R,6aS,7S,11aR)-7-hydroxy-5,5,8,8-tetramethyl-15-methylene-**  
**1,3,3a,7,7a,8,9,11b-octahydro-2H-6a,11a-(epoxymethano)-3,3a1-**  
**ethanophenanthro[1,10-de][1,3]dioxin-14-one (5)**

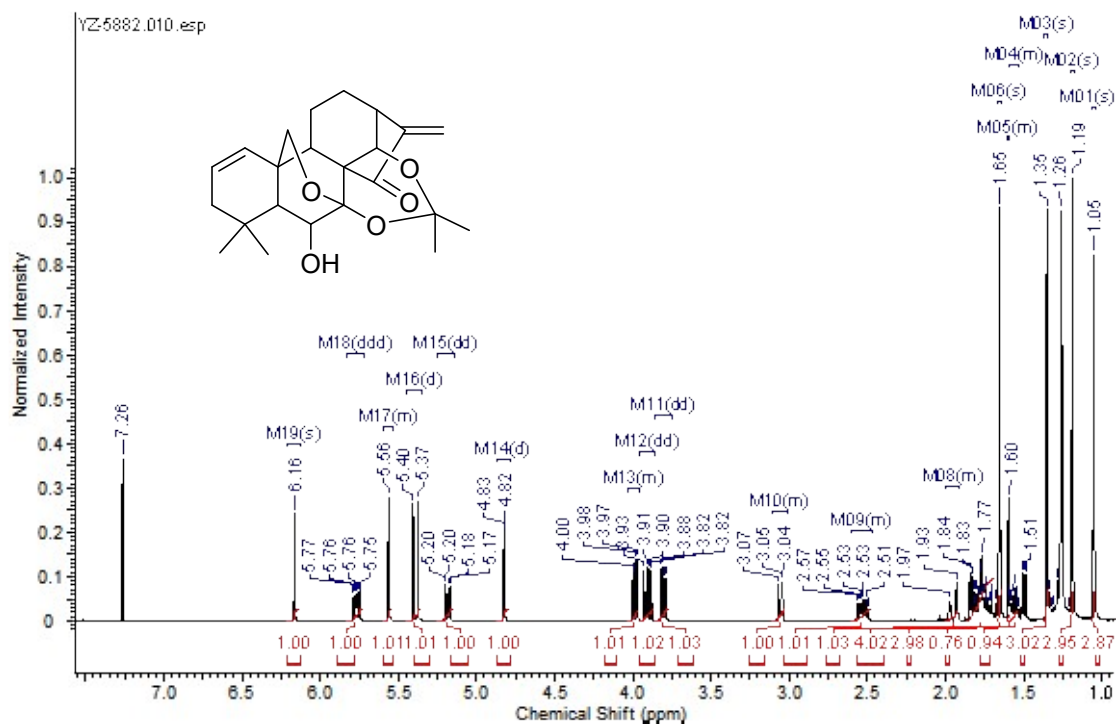

**Figure S20.**  $^1\text{H}$  and  $^{13}\text{C}$  NMR spectra of **5,6,14-trihydroxy-4,4-dimethyl-8-methylene-4,4a,5,6,9,10,11,11a-octahydro-3H-6,11b-(epoxymethano)-6a,9-methanocyclohepta[a]naphthalen-7(8H)-one (6)**

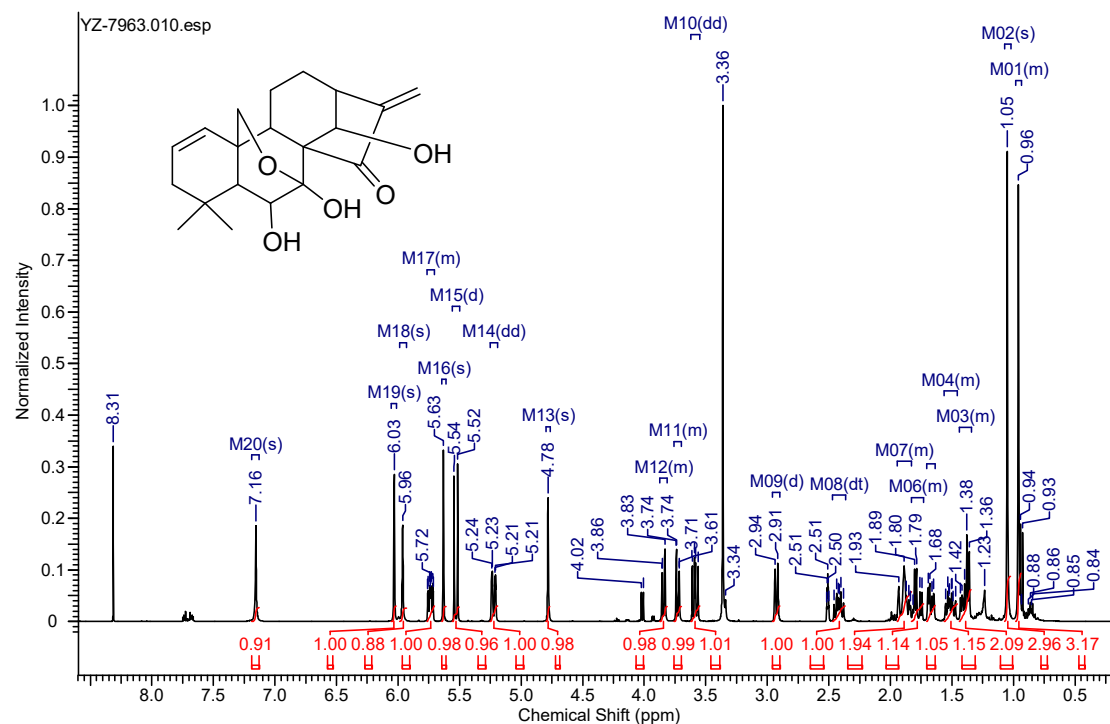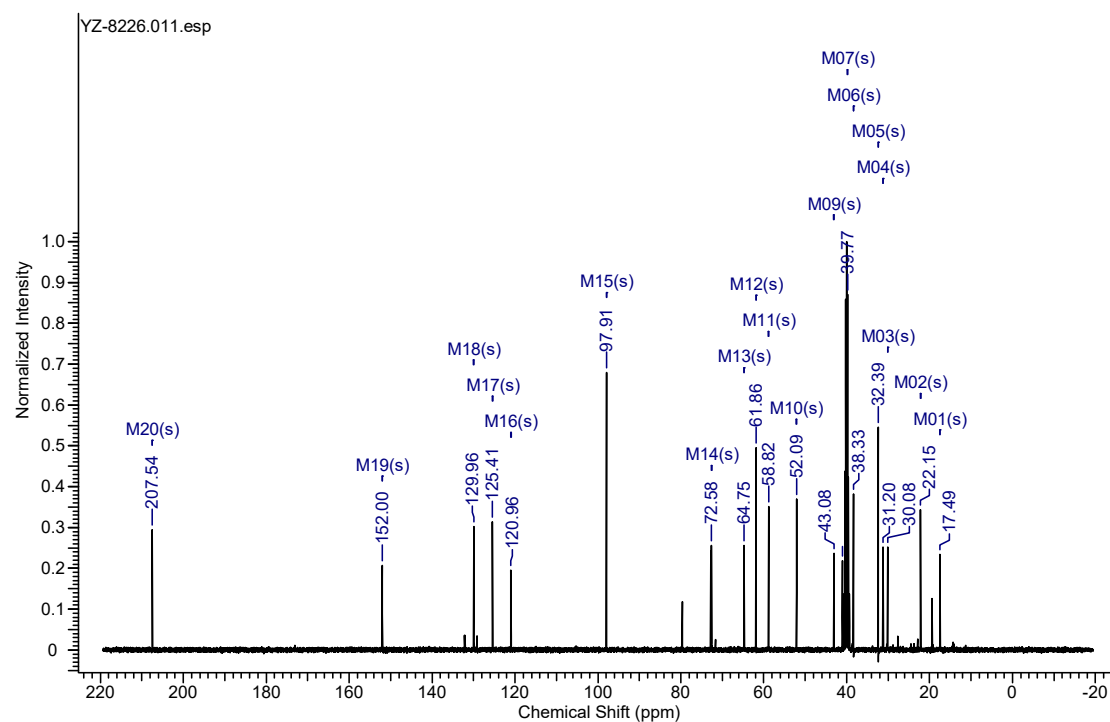



**Figure S21.**  $^1\text{H}$  and  $^{13}\text{C}$  NMR spectra of **5,6-dihydroxy-4,4-dimethyl-8-methylene-7-oxo-4,4a,5,6,7,8,9,10,11,11a-decahydro-3H-6,11b-(epoxymethano)-6a,9-methanocyclohepta[a]naphthalen-14-yl 2-(3,4,5-trimethoxyphenyl)acetate (6a)**

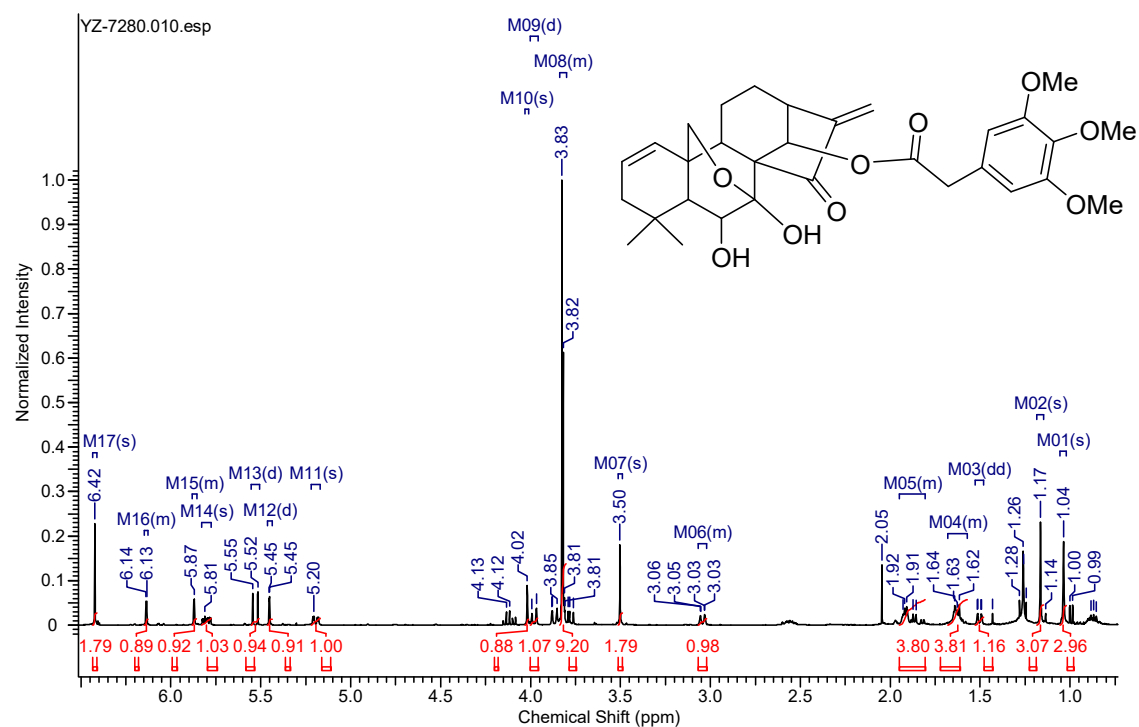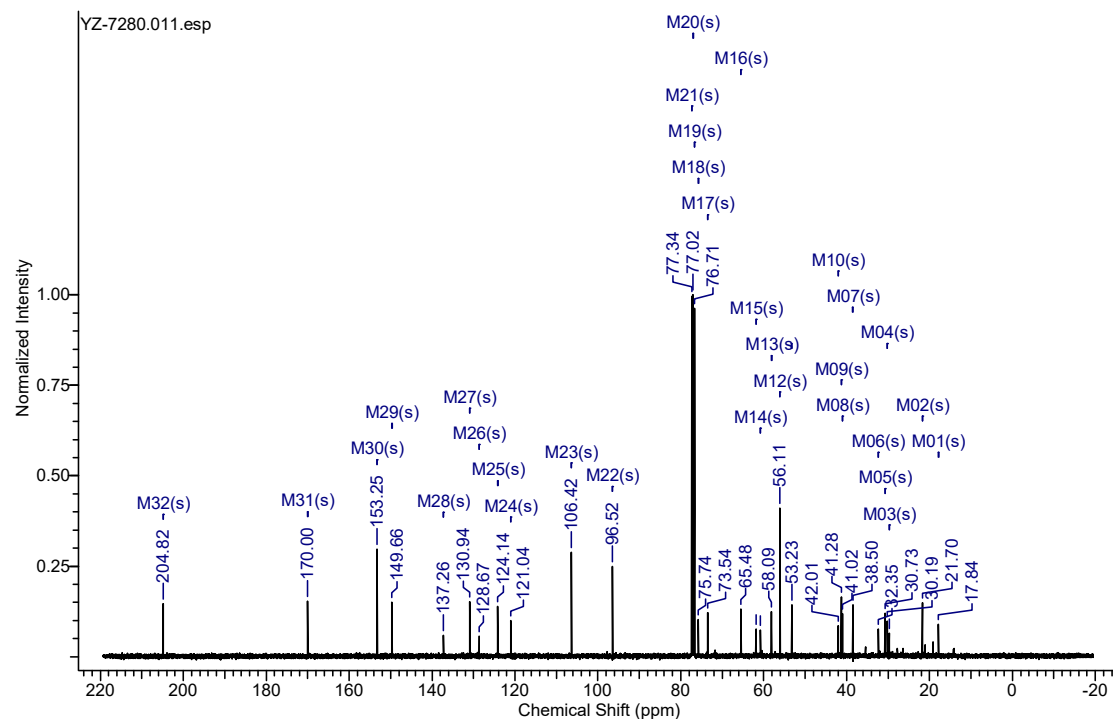



**Figure S22.**  $^1\text{H}$  and  $^{13}\text{C}$  NMR spectra of **5,6-dihydroxy-4,4-dimethyl-8-methylene-7-oxo-4,4a,5,6,7,8,9,10,11,11a-decahydro-3H-6,11b-(epoxymethano)-6a,9-methanocyclohepta[a]naphthalen-14-yl 2-(3,4-dimethoxyphenyl)acetate (6b)**

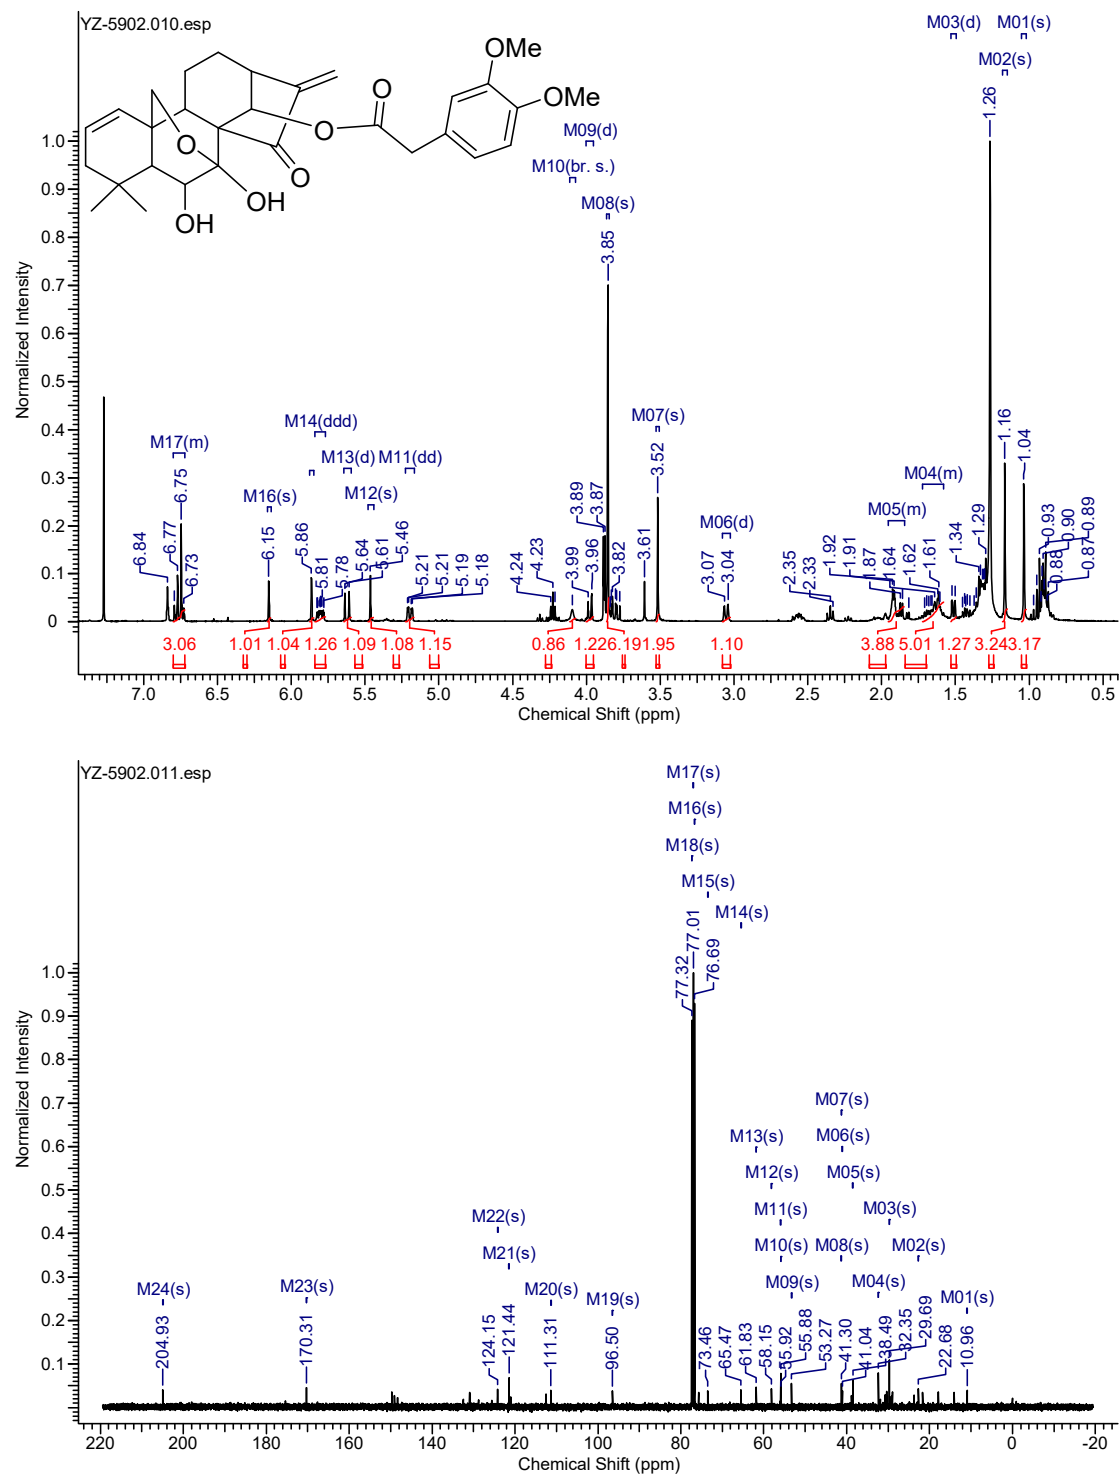

**Figure S23.**  $^1\text{H}$  and  $^{13}\text{C}$  NMR spectra of **5,6-dihydroxy-4,4-dimethyl-8-methylene-7-oxo-4,4a,5,6,7,8,9,10,11,11a-decahydro-3H-6,11b-(epoxymethano)-6a,9-methanocyclohepta[a]naphthalen-14-yl 2-(4-methoxyphenyl)acetate (6c)**

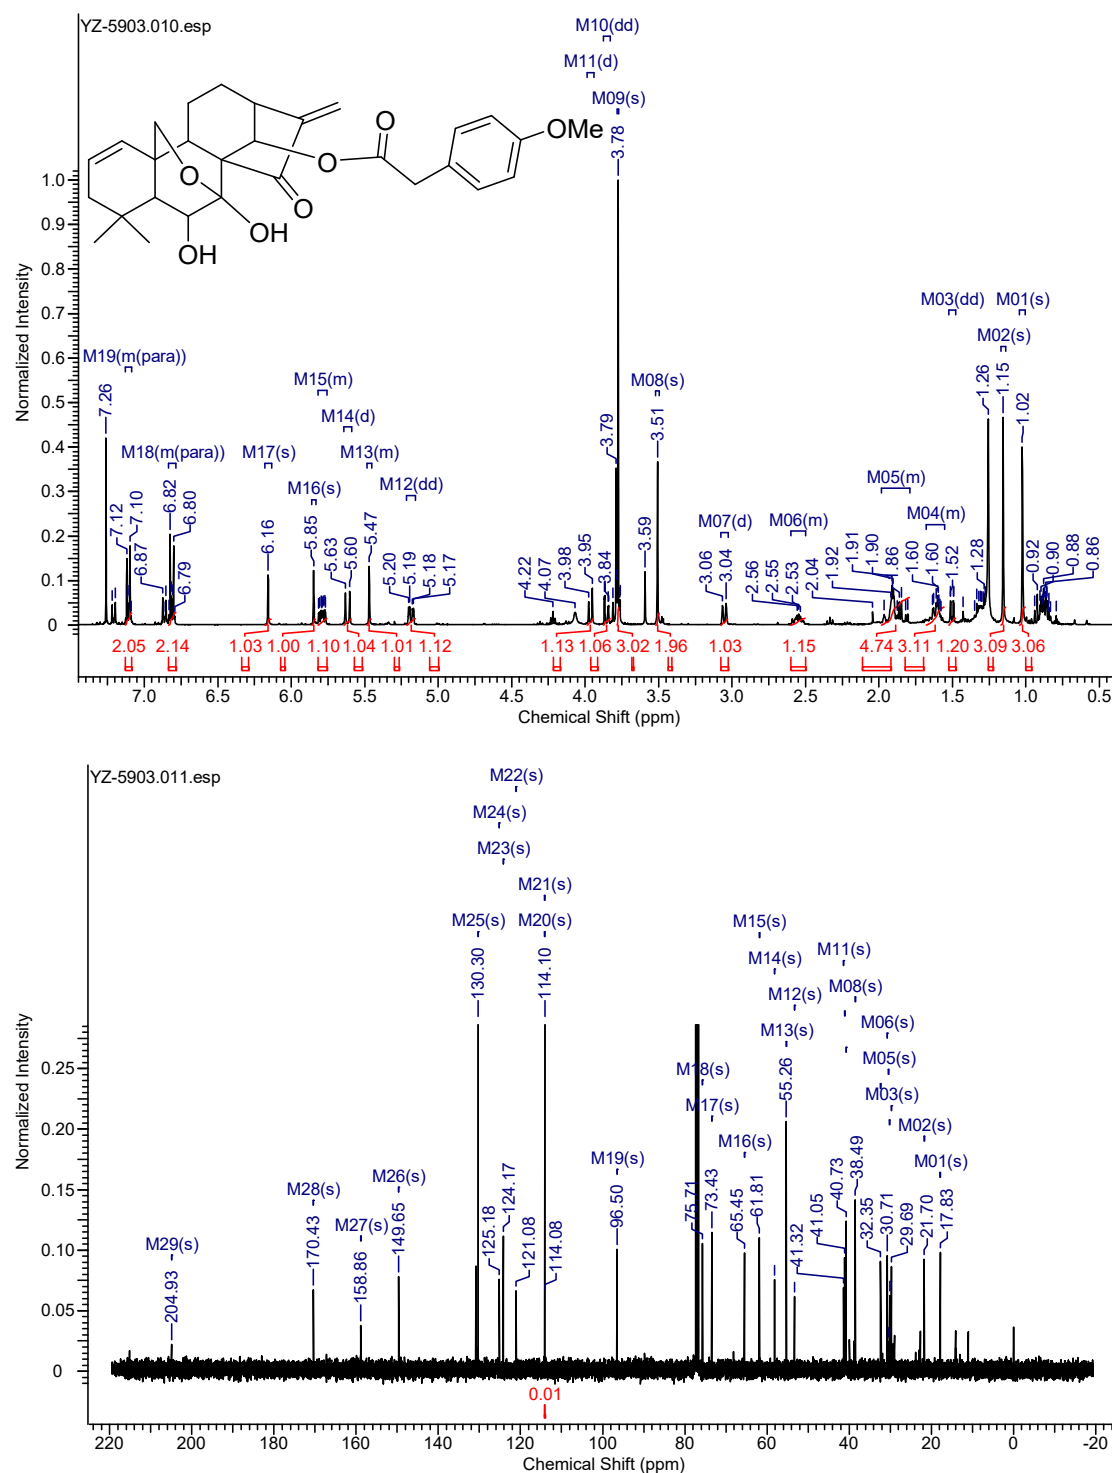

**Figure S24.**  $^1\text{H}$  and  $^{13}\text{C}$  NMR spectra of **5,6-dihydroxy-4,4-dimethyl-8-methylene-7-oxo-4,4a,5,6,7,8,9,10,11,11a-decahydro-3H-6,11b-(epoxymethano)-6a,9-methanocyclohepta[a]naphthalen-14-yl adamantane-1-carboxylate (6d)**

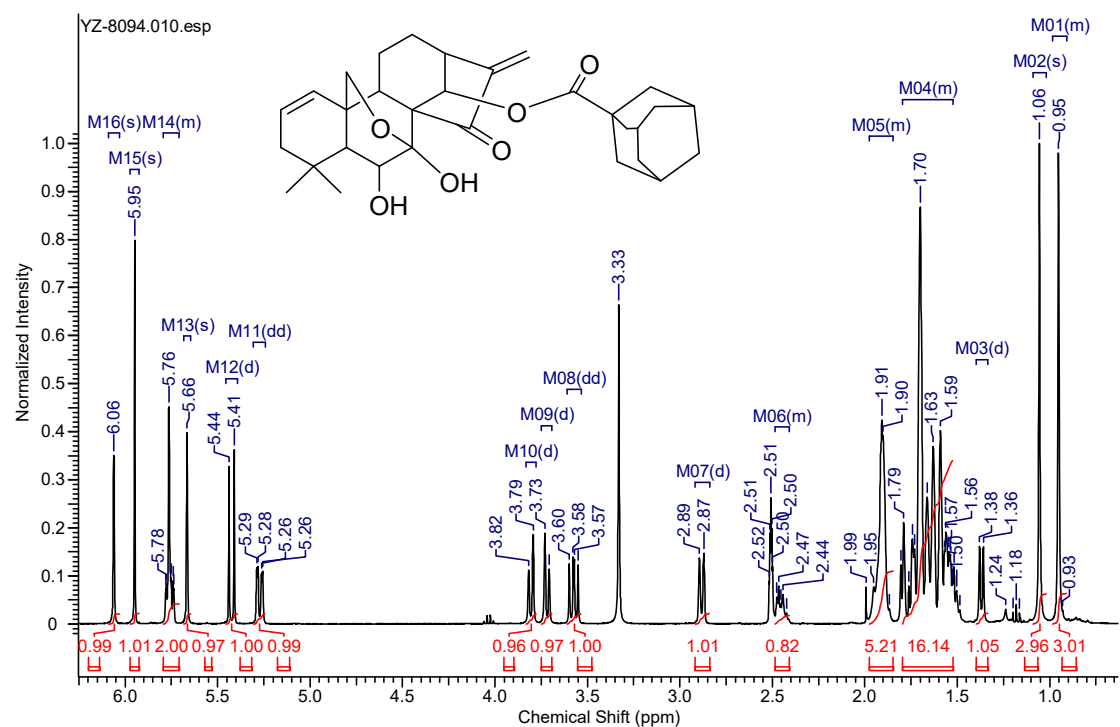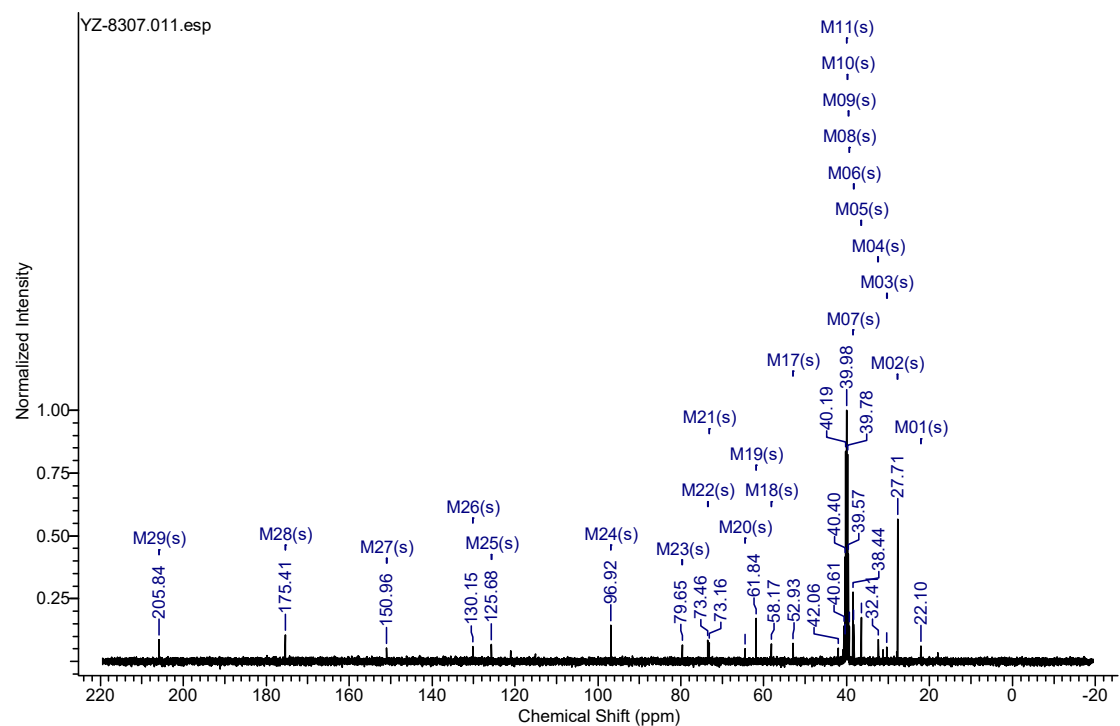

**Figure S25.**  $^1\text{H}$  and  $^{13}\text{C}$  NMR spectra of **5,6-dihydroxy-4,4-dimethyl-8-methylene-7-oxo-4,4a,5,6,7,8,9,10,11,11a-decahydro-3H-6,11b-(epoxymethano)-6a,9-methanocyclohepta[a]naphthalen-14-yl 4-(bis(2-chloroethyl)amino)benzoate (6e).**

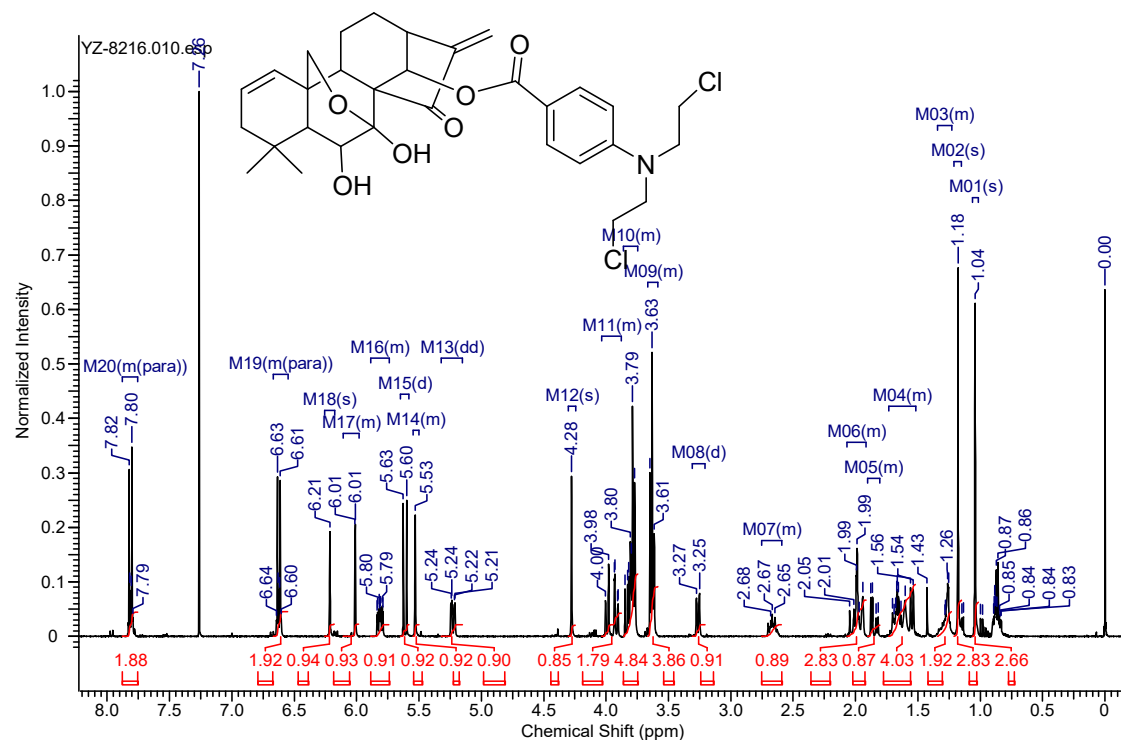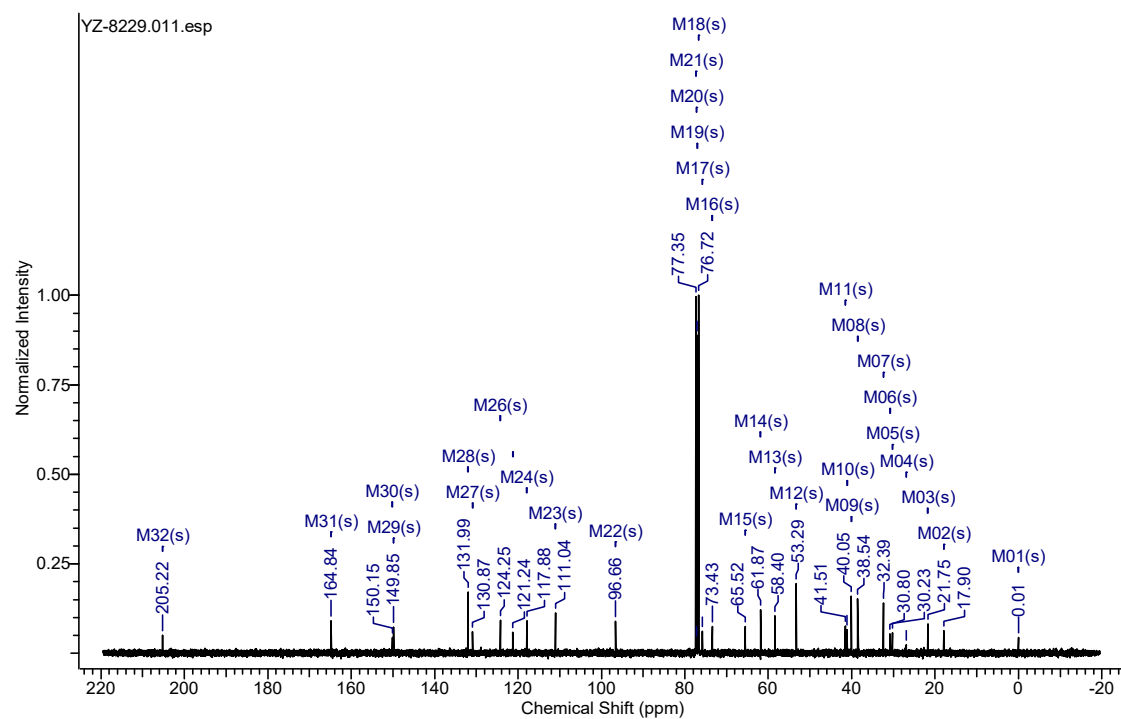

**Figure S26.**  $^1\text{H}$  and  $^{13}\text{C}$  NMR spectra of **14-hydroxy-4,4-dimethyl-8-methylene-3,4,4a,5,9,10,11,11a-octahydro-6H-5,11b-(epoxymethano)-6a,9-methanocyclohepta[a]naphthalene-6,7(8H)-dione (7)**.

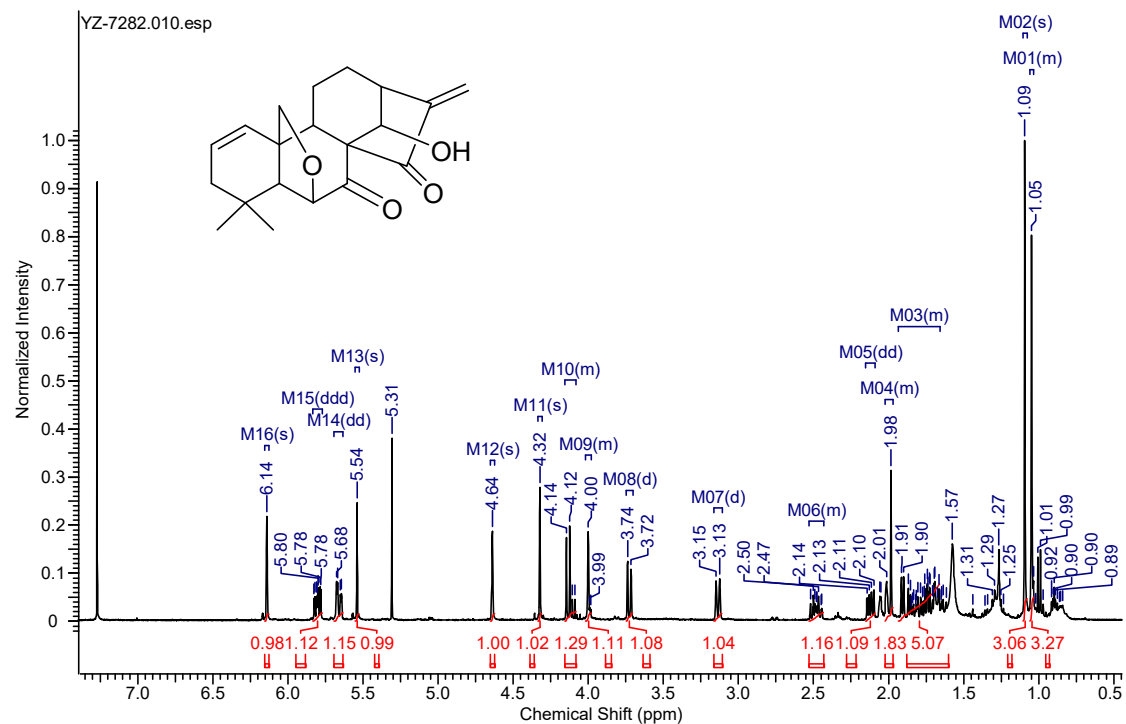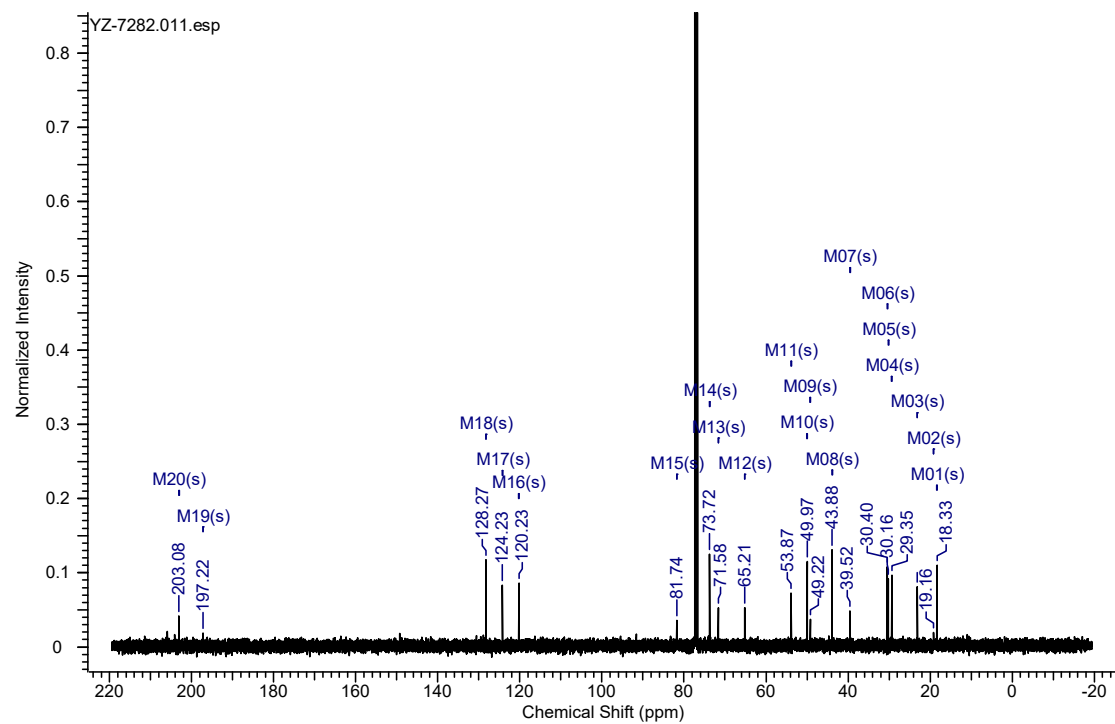

**Figure S27.**  $^1\text{H}$  and  $^{13}\text{C}$  NMR spectra of **4,4-dimethyl-8-methylene-6,7-dioxo-4,4a,5,6,7,8,9,10,11,11a-decahydro-3H-5,11b-(epoxymethano)-6a,9-methanocyclohepta[a]naphthalen-14-yl 2-(3,4,5-trimethoxyphenyl)acetate (7a)**

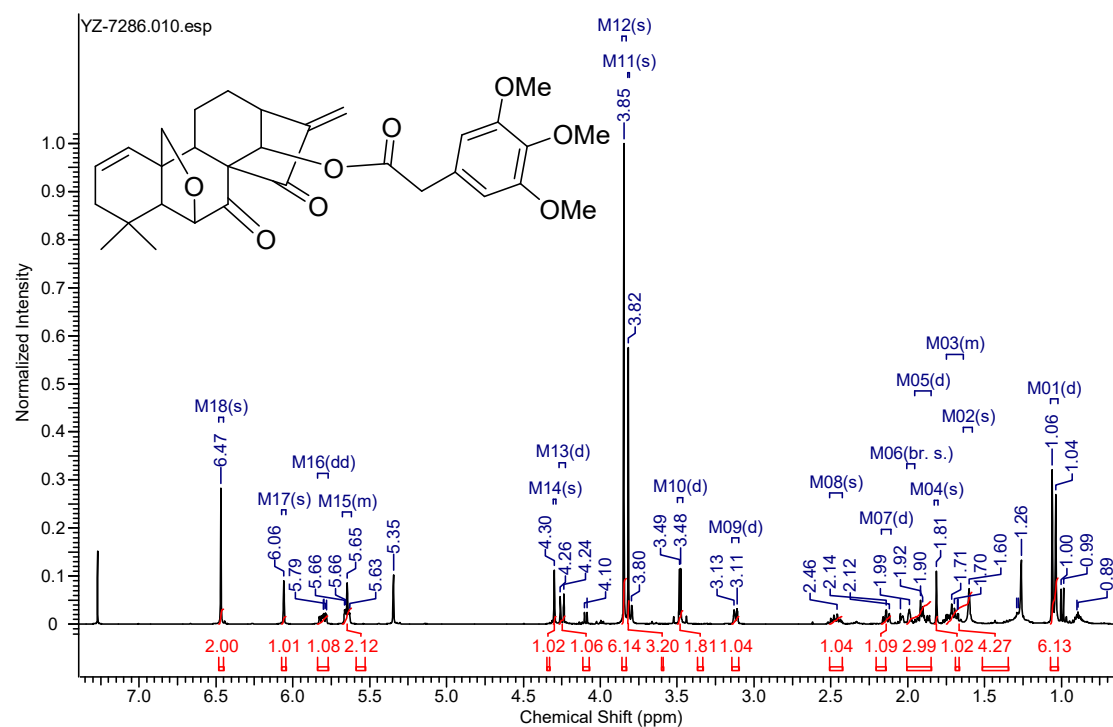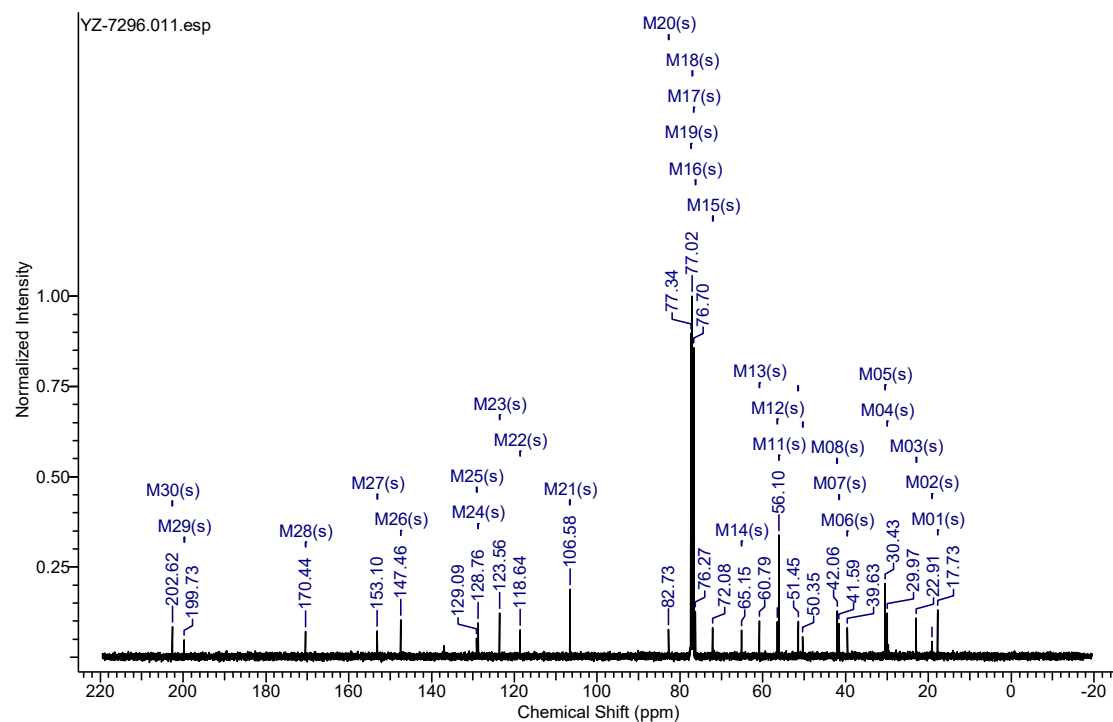



**Figure S28.**  $^1\text{H}$  and  $^{13}\text{C}$  NMR spectra of **4,4-dimethyl-8-methylene-6,7-dioxo-4,4a,5,6,7,8,9,10,11,11a-decahydro-3H-5,11b-(epoxymethano)-6a,9-methanocyclohepta[a]naphthalen-14-yl adamantane-1-carboxylate (7d).**

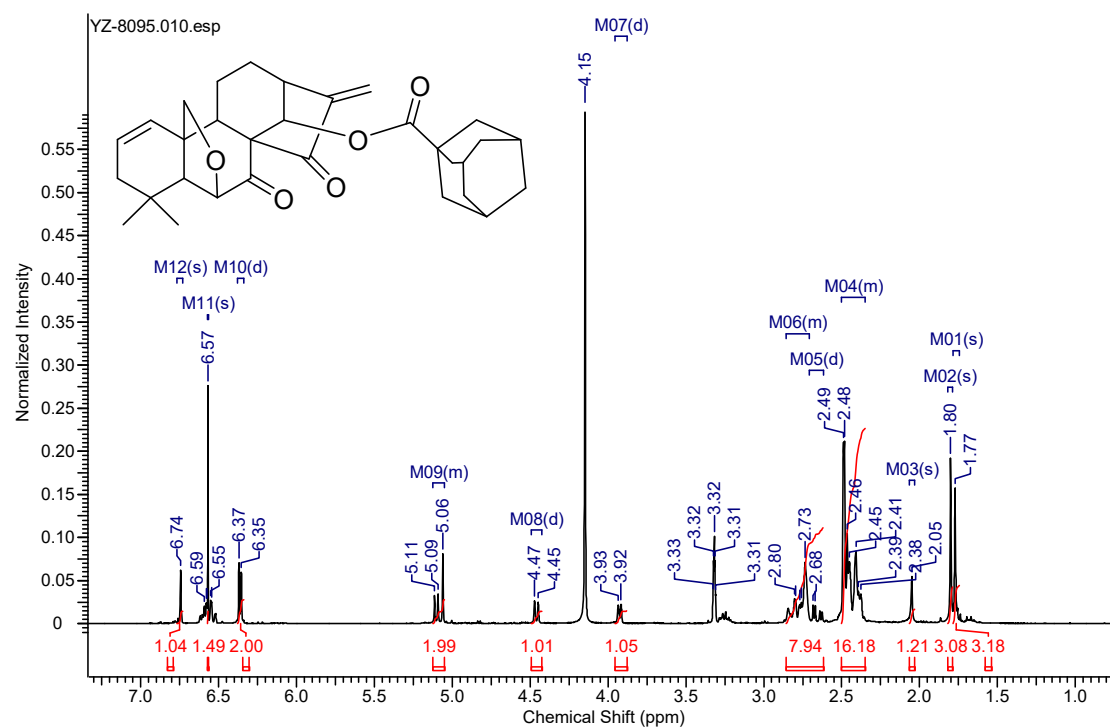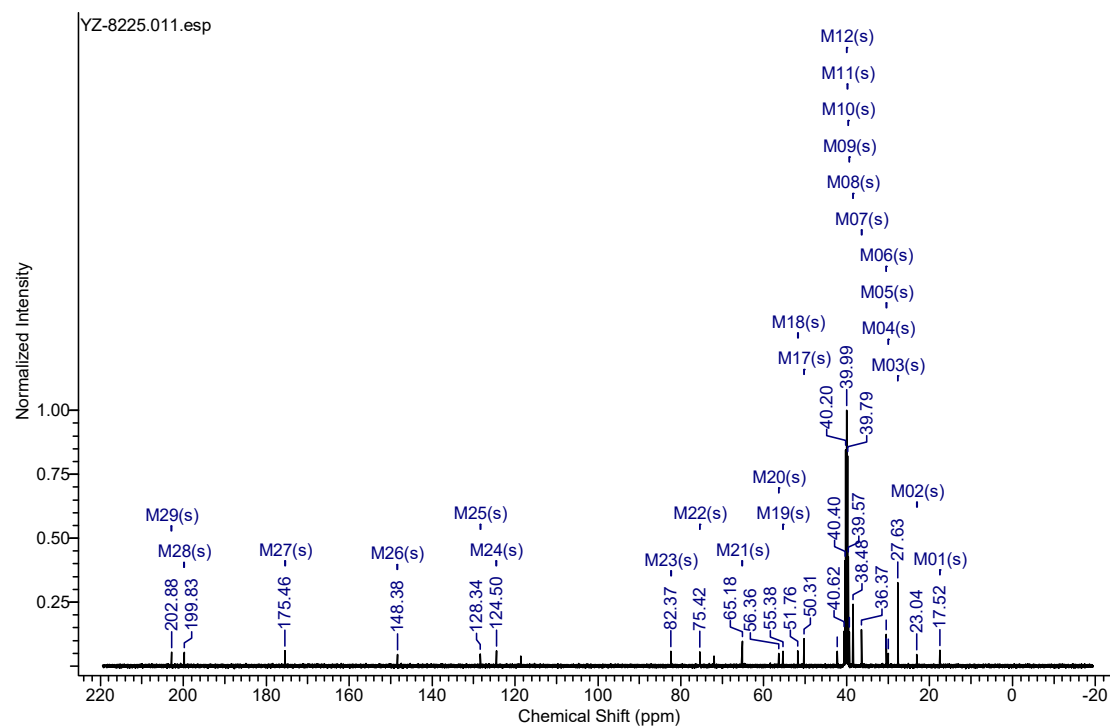

**Figure S29.**  $^1\text{H}$  and  $^{13}\text{C}$  NMR spectra of **4,4-dimethyl-8-methylene-6,7-dioxo-4,4a,5,6,7,8,9,10,11,11a-decahydro-3H-5,11b-(epoxymethano)-6a,9-methanocyclohepta[a]naphthalen-14-yl 4-(bis(2-chloroethyl)amino)benzoate (7e)**

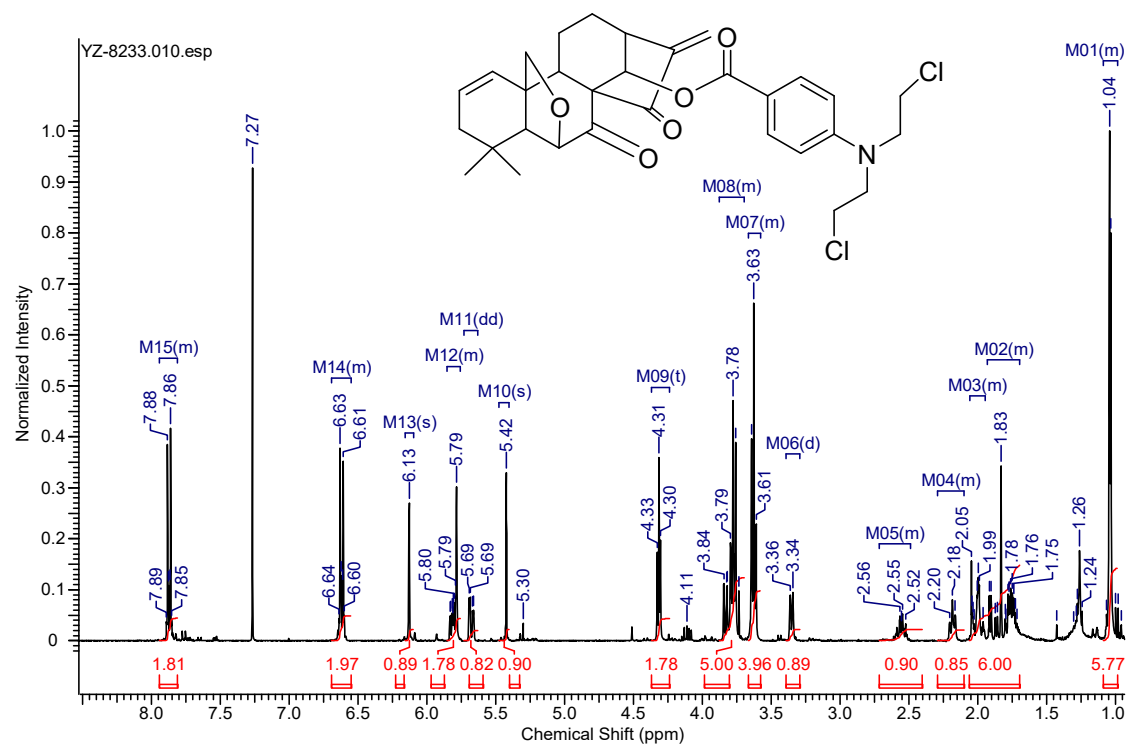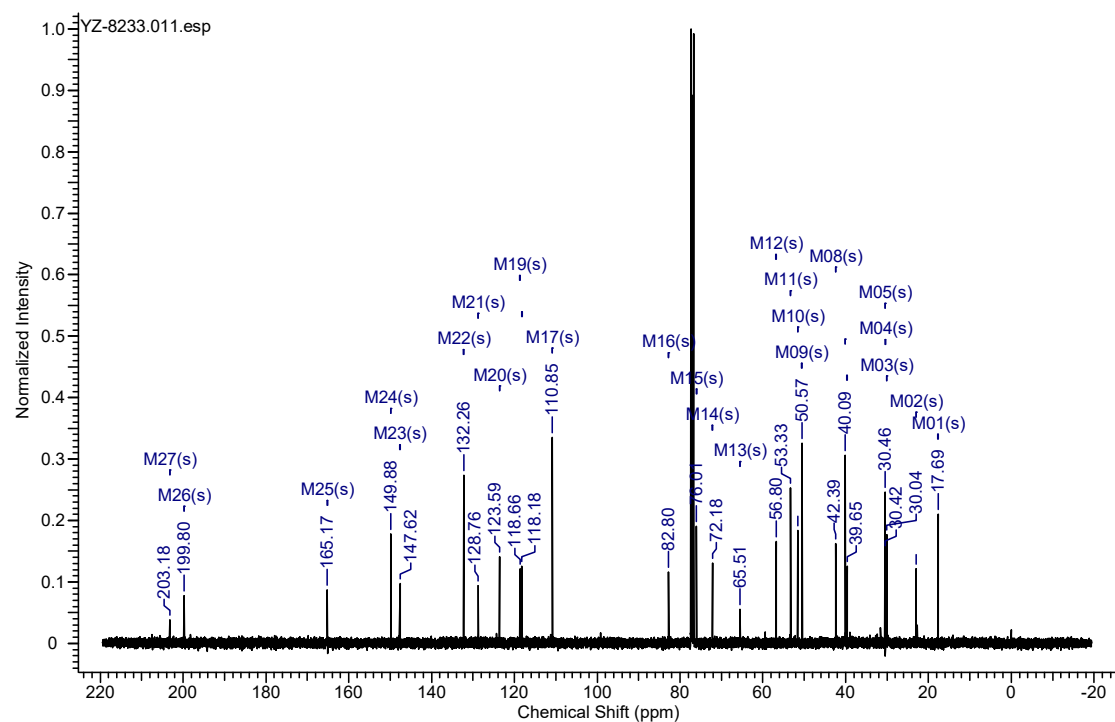



**Figure S30.**  $^1\text{H}$  and  $^{13}\text{C}$  NMR spectra of **5,6,14-trihydroxy-4,4-dimethyl-8-methylene-7-oxododecahydro-1H-6,11b-(epoxymethano)-6a,9-methanocyclohepta[a]naphthalen-1-yl acetate (9)**.

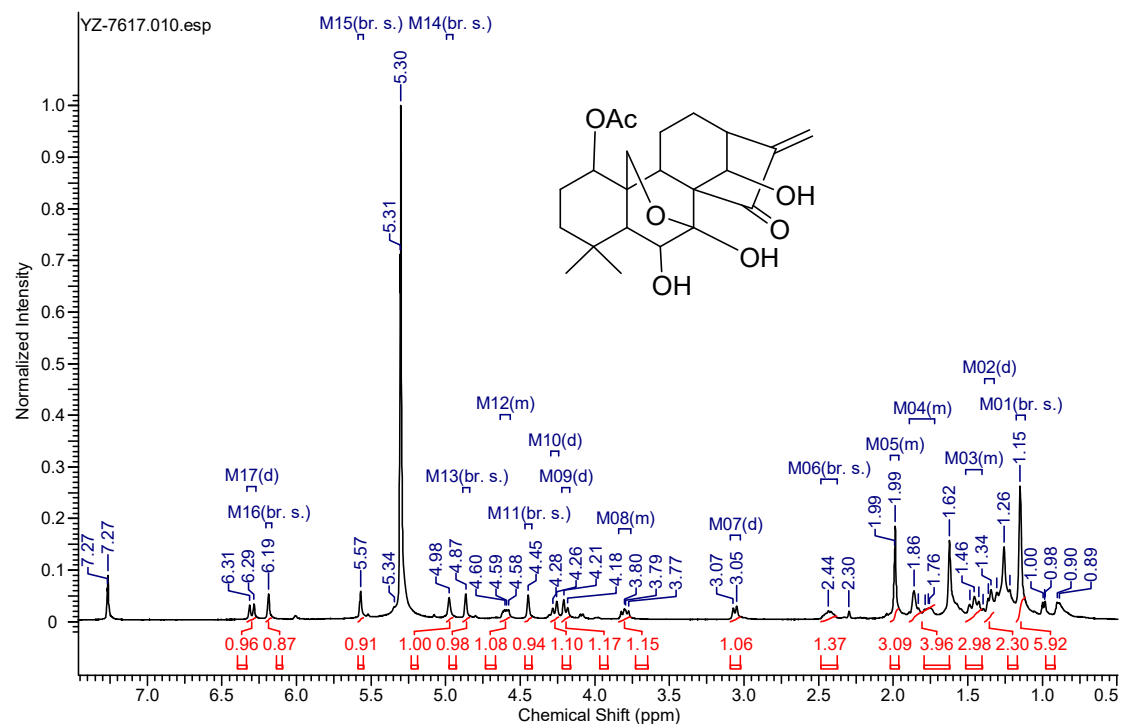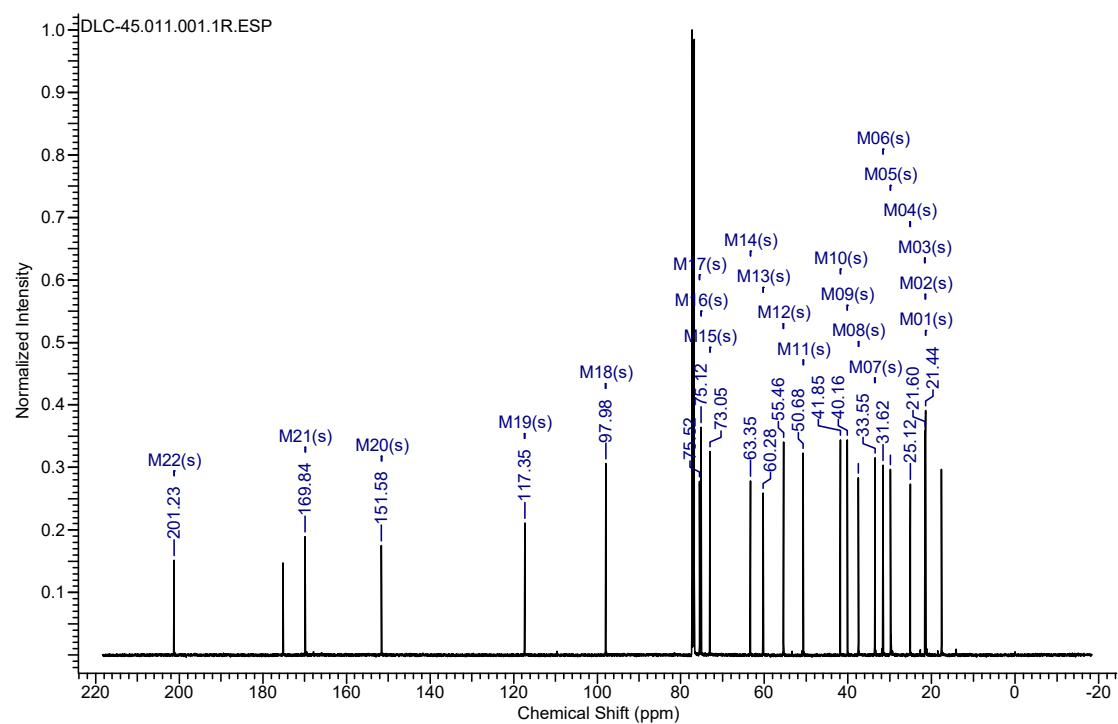

**Figure S31.**  $^1\text{H}$  and  $^{13}\text{C}$  NMR spectra of **1-acetoxy-5,6-dihydroxy-4,4-dimethyl-8-methylene-7-oxododecahydro-1H-6,11b-(epoxymethano)-6a,9-methanocyclohepta[a]naphthalen-14-yl adamantane-1-carboxylate (9a)**

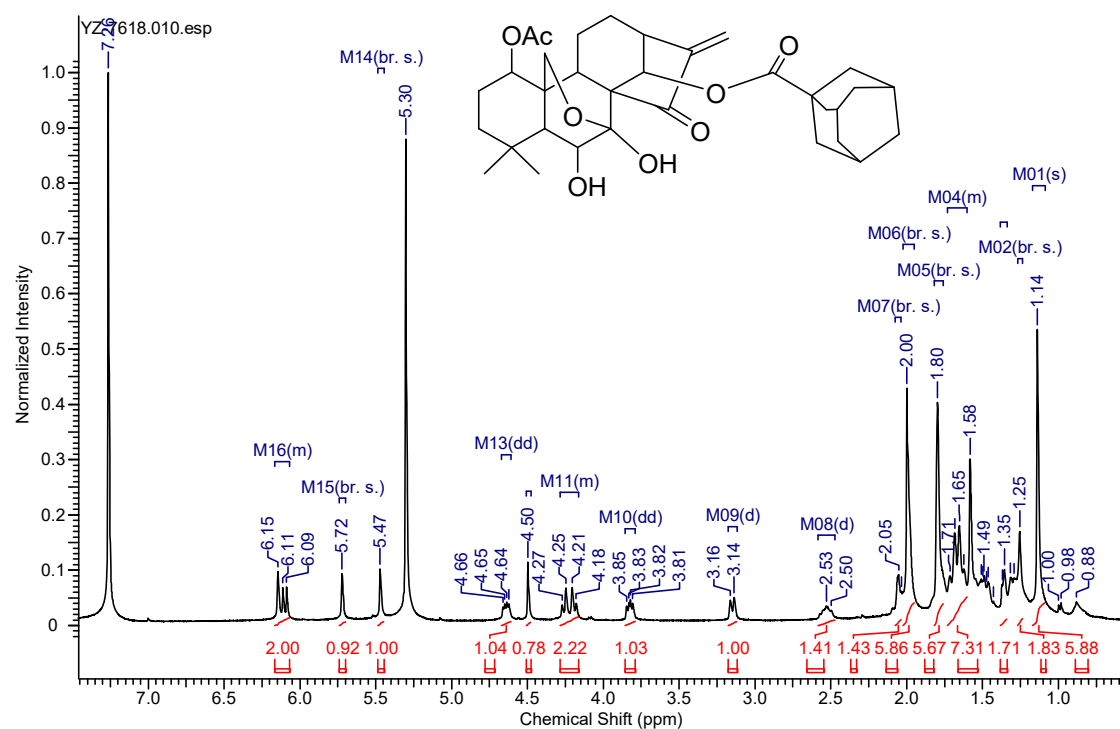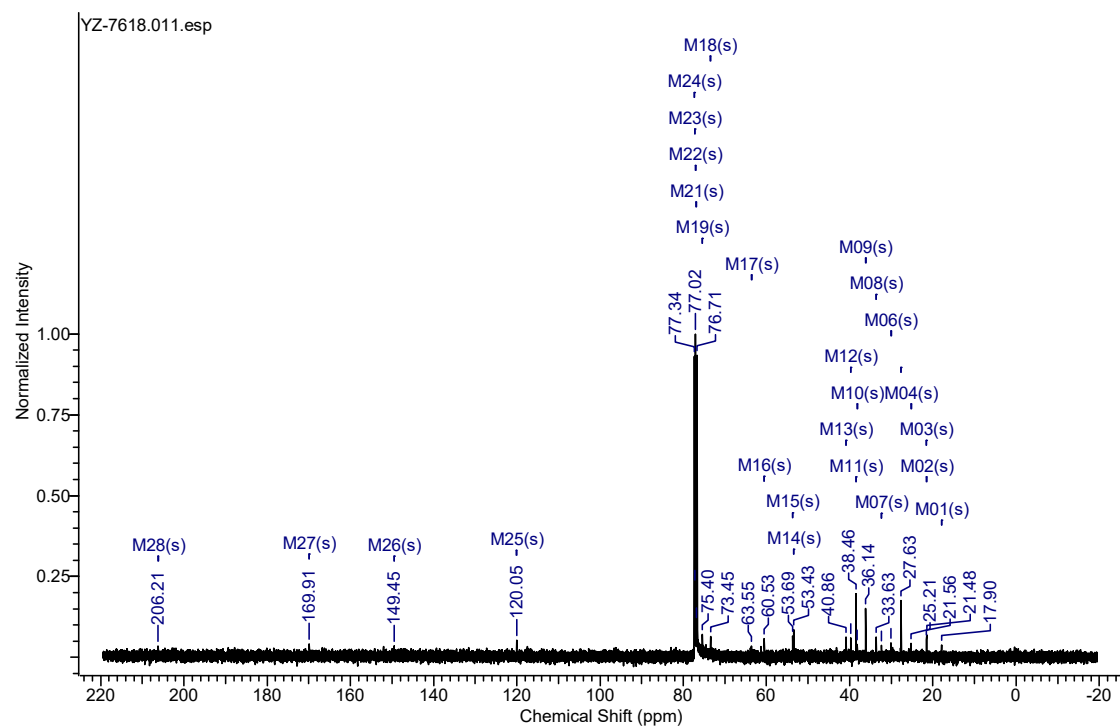



**Figure S33.**  $^1\text{H}$  and  $^{13}\text{C}$  NMR spectra of **1,5,6-Trihydroxy-4,4-dimethyl-8-methylene-7-oxododecahydro-1H-6,11b-(epoxymethano)-6a,9-methanocyclohepta[a]naphthalen-14-yl adamantane-1-carboxylate (11a)**

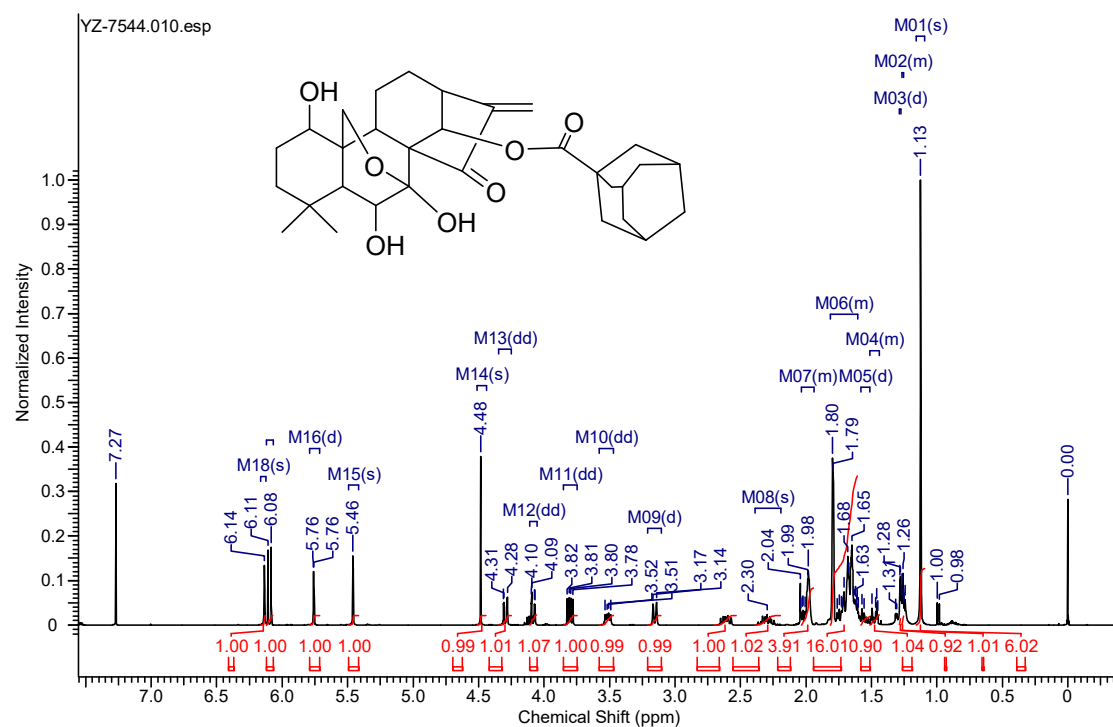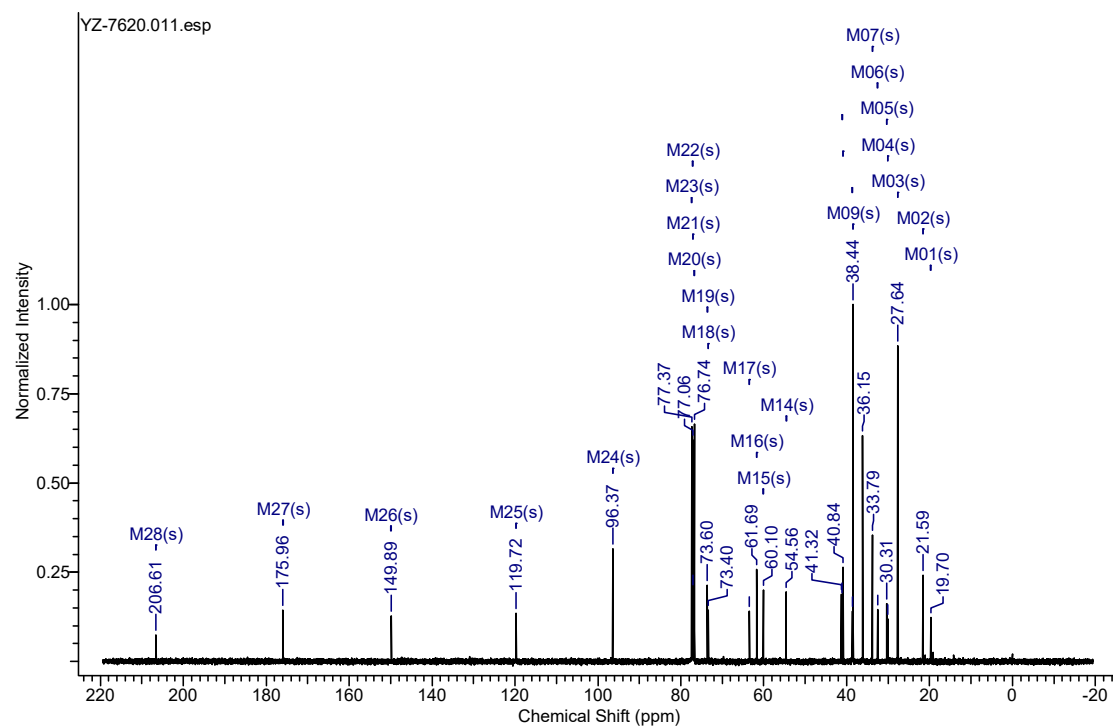

**Figure S34.**  $^1\text{H}$  and  $^{13}\text{C}$  NMR spectra of **1,5,6-trihydroxy-4,4-dimethyl-8-methylene-7-oxododecahydro-1H-6,11b-(epoxymethano)-6a,9-methanocyclohepta[a]naphthalen-14-yl 4-(bis(2-chloroethyl)amino)benzoate (11b)**

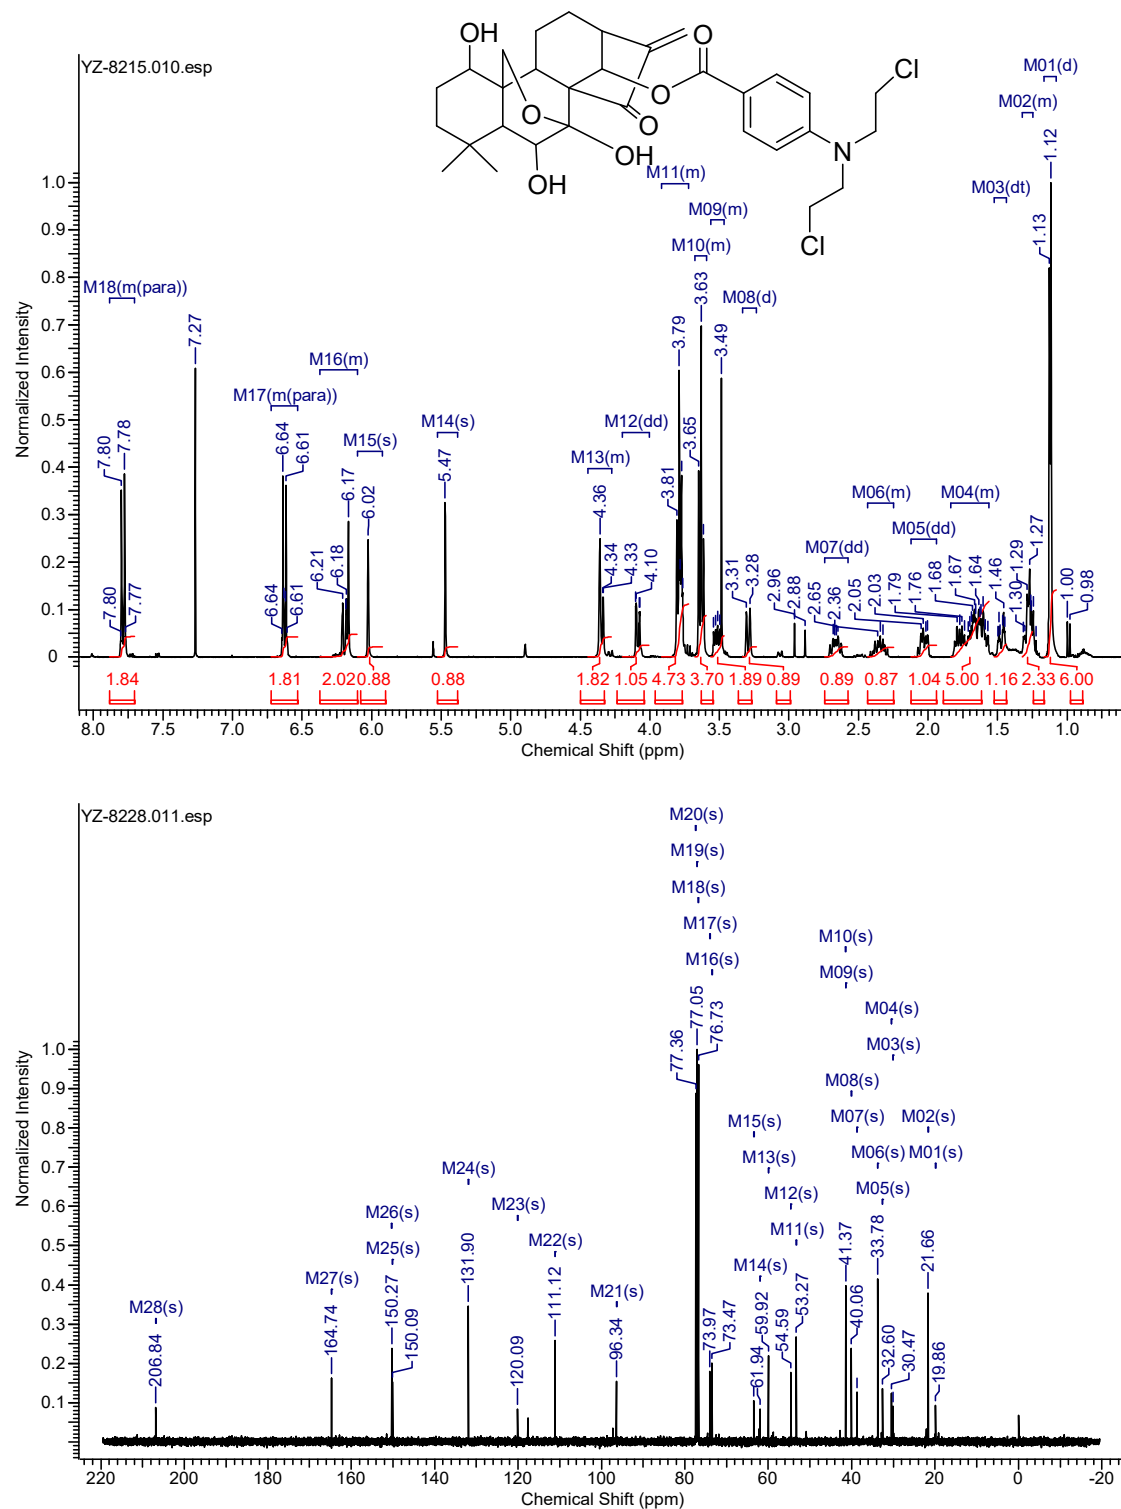



**Figure S35.**  $^1\text{H}$  and  $^{13}\text{C}$  NMR spectra of **1-hydroxy-4,4-dimethyl-8-methylene-6,7-dioxododecahydro-1H-5,11b-(epoxymethano)-6a,9-methanocyclohepta[a]naphthalen-14-yl adamantane-1-carboxylate (12a)**

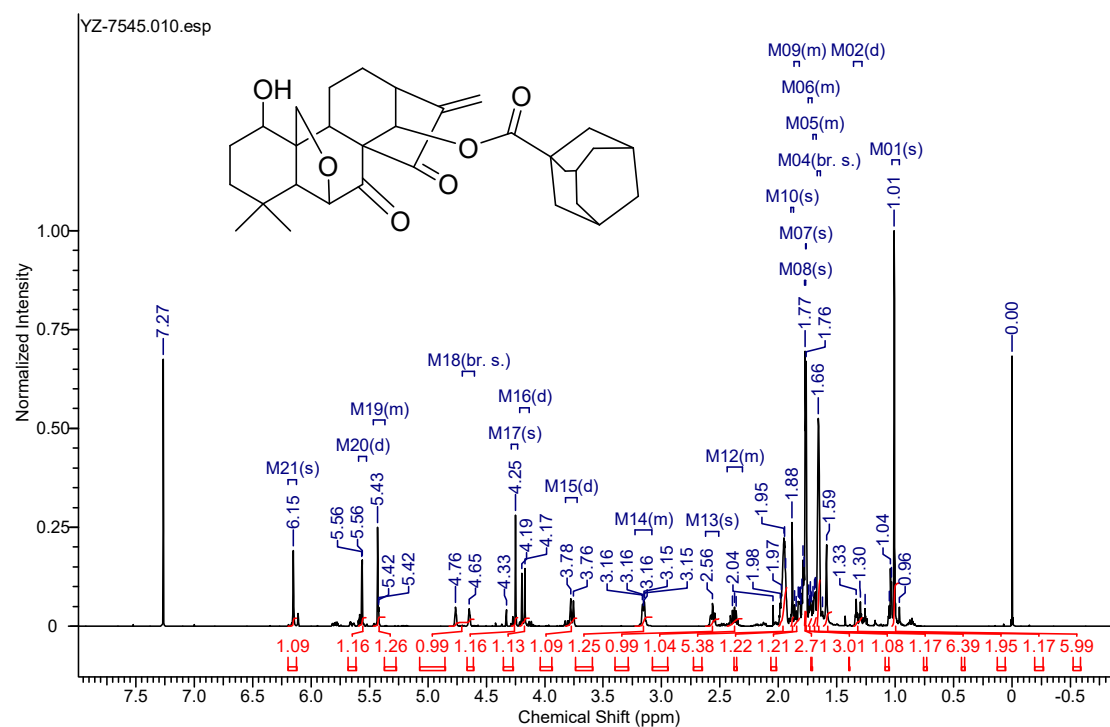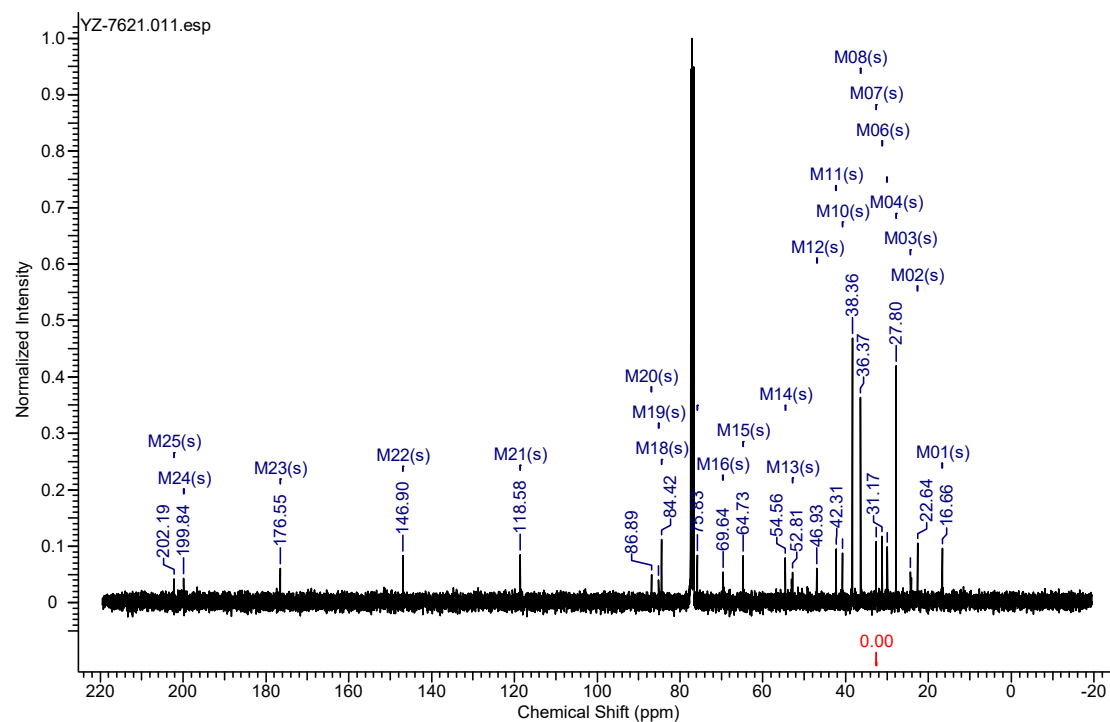

**Figure S36.**  $^1\text{H}$  and  $^{13}\text{C}$  NMR spectra of **1-hydroxy-4,4-dimethyl-8-methylene-6,7-dioxododecahydro-1H-5,11b-(epoxymethano)-6a,9-methanocyclohepta[a]naphthalen-14-yl 4-(bis(2-chloroethyl)amino)benzoate (12b)**

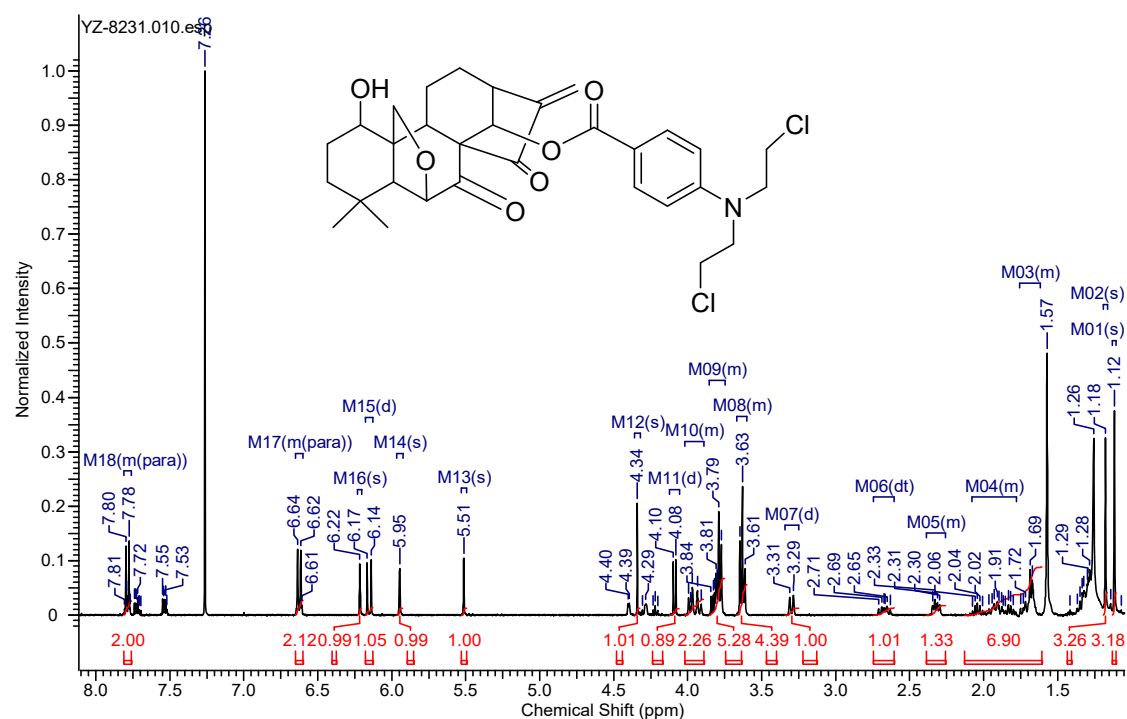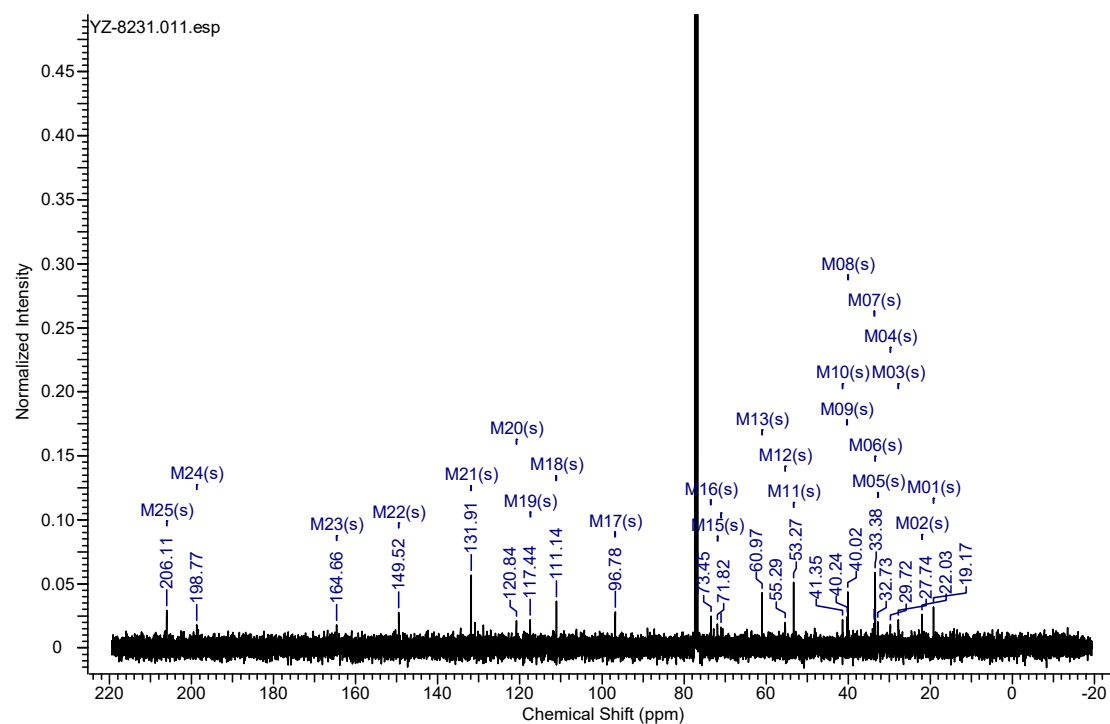

**Figure S37.** HRMS spectra of **5,6,14-trihydroxy-4,4-dimethyl-8-methylenedecahydro-1H-6,11b-(epoxymethano)-6a,9-methanocyclohepta[a]naphthalene-1,7(8H)-dione (1)**

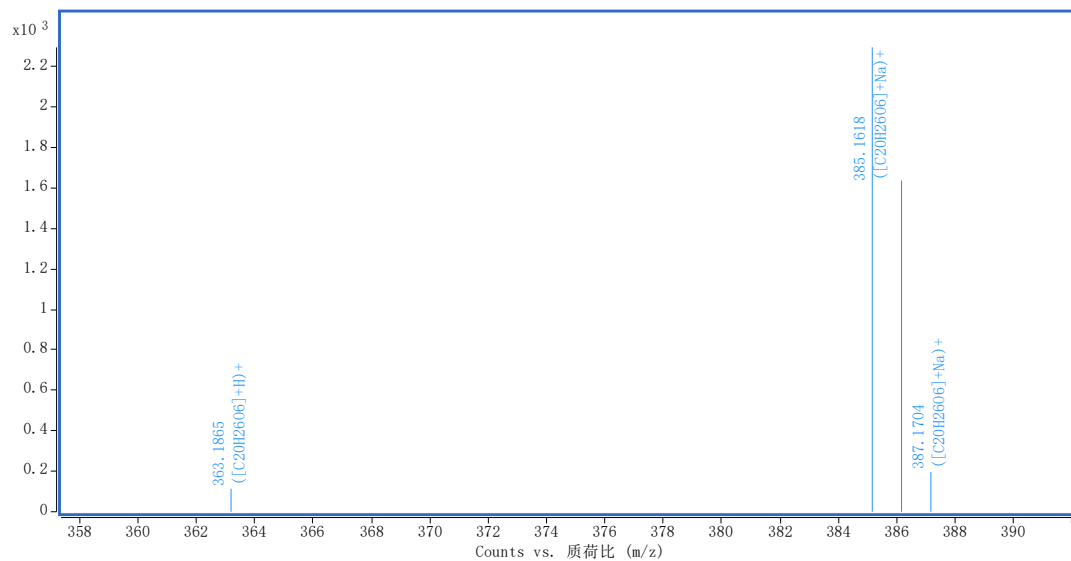

**Figure S38.** HRMS spectra of **5,6-dihydroxy-4,4-dimethyl-8-methylene-1,7-dioxododecahydro-1H-6,11b-(epoxymethano)-6a,9-methanocyclohepta[a]naphthalen-14-yl 2-(3,4,5-trimethoxyphenyl)acetate (1a)**

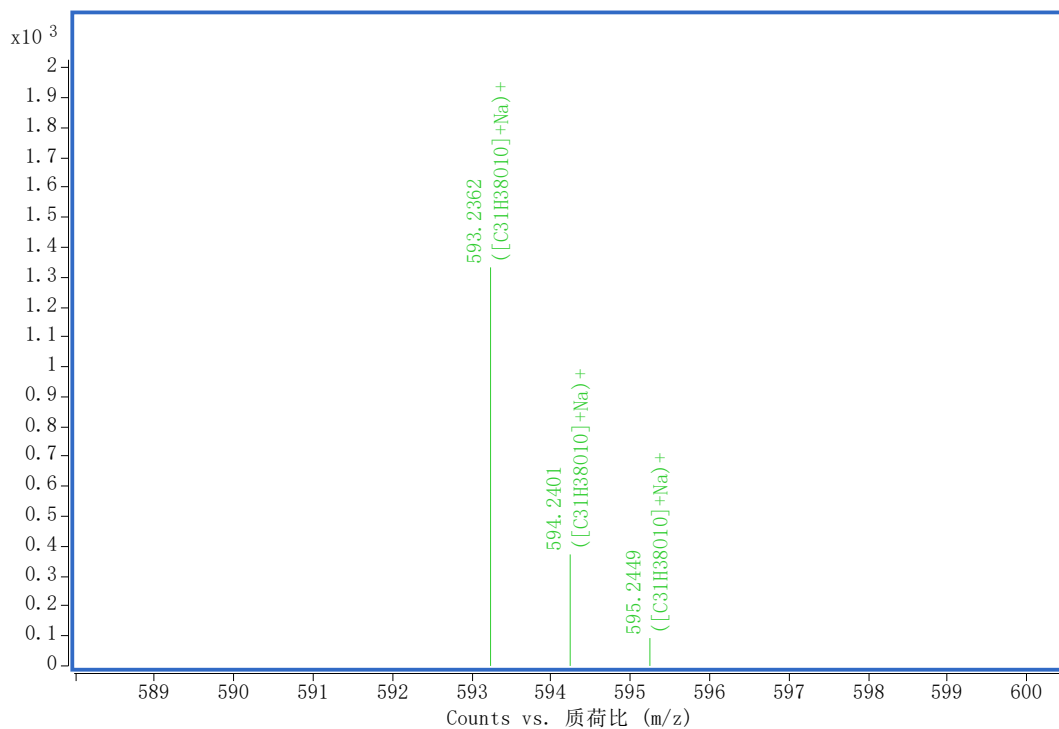

**Figure S39.** HRMS spectra of **5,6-dihydroxy-4,4-dimethyl-8-methylene-1,7-dioxododecahydro-1H-6,11b-(epoxymethano)-6a,9-methanocyclohepta[a]naphthalen-14-yl 2-(3,4-dimethoxyphenyl)acetate (1b)**

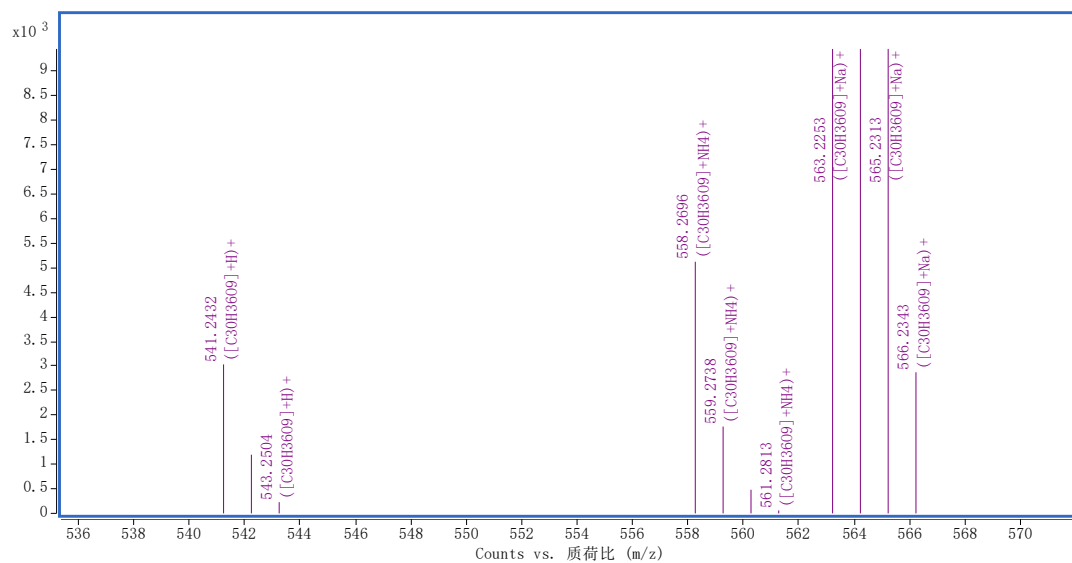

**Figure S40.** HRMS spectra of **5,6-dihydroxy-4,4-dimethyl-8-methylene-1,7-dioxododecahydro-1H-6,11b-(epoxymethano)-6a,9-methanocyclohepta[a]naphthalen-14-yl 2-(4-methoxyphenyl)acetate (1c)**

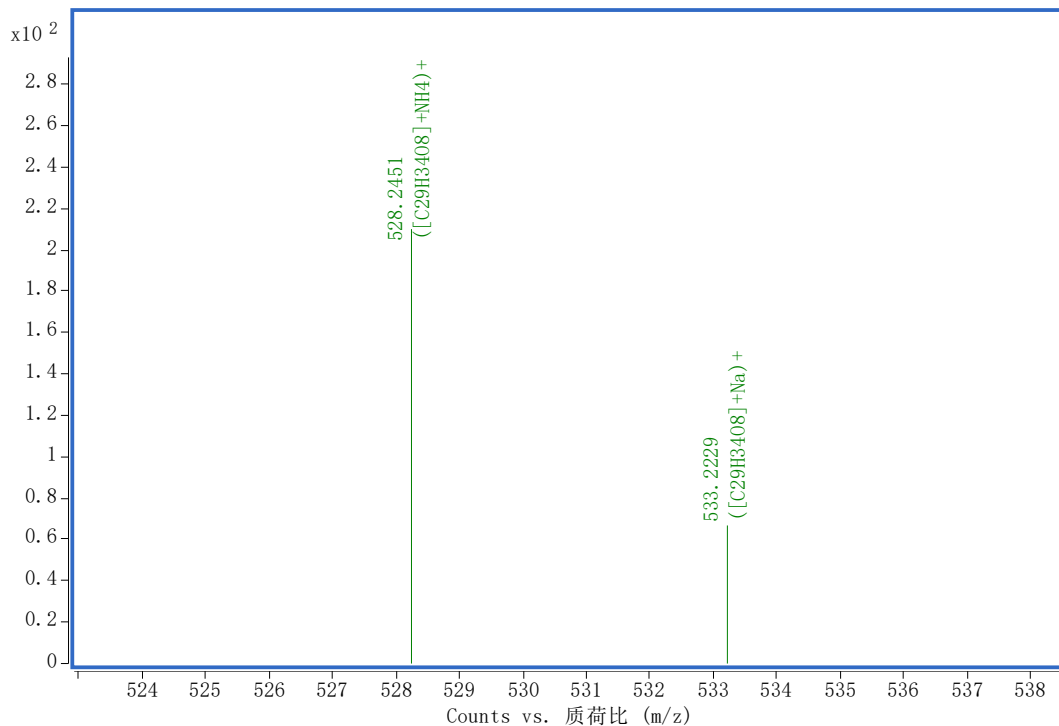

**Figure S41.** HRMS spectra of **5,6-dihydroxy-4,4-dimethyl-8-methylene-1,7-dioxododecahydro-1H-6,11b-(epoxymethano)-6a,9-methanocyclohepta[a]naphthalen-14-yl 2-(2-bromophenyl)acetate (1d)**

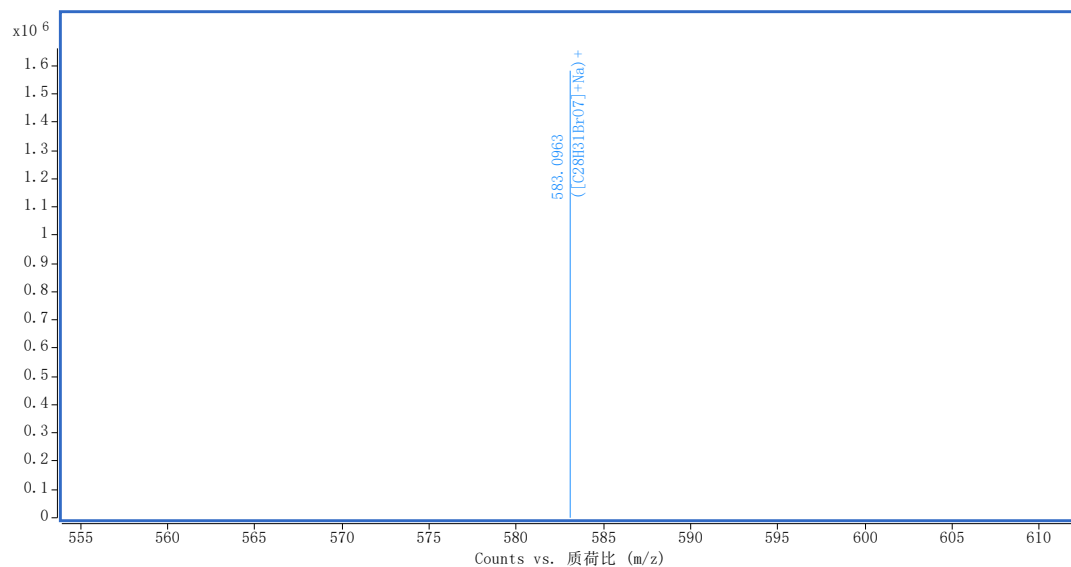

**Figure S42.** HRMS spectra of **5,6-dihydroxy-4,4-dimethyl-8-methylene-1,7-dioxododecahydro-1H-6,11b-(epoxymethano)-6a,9-methanocyclohepta[a]naphthalen-14-yl 4-(bis(2-chloroethyl)amino)benzoate (1e)**

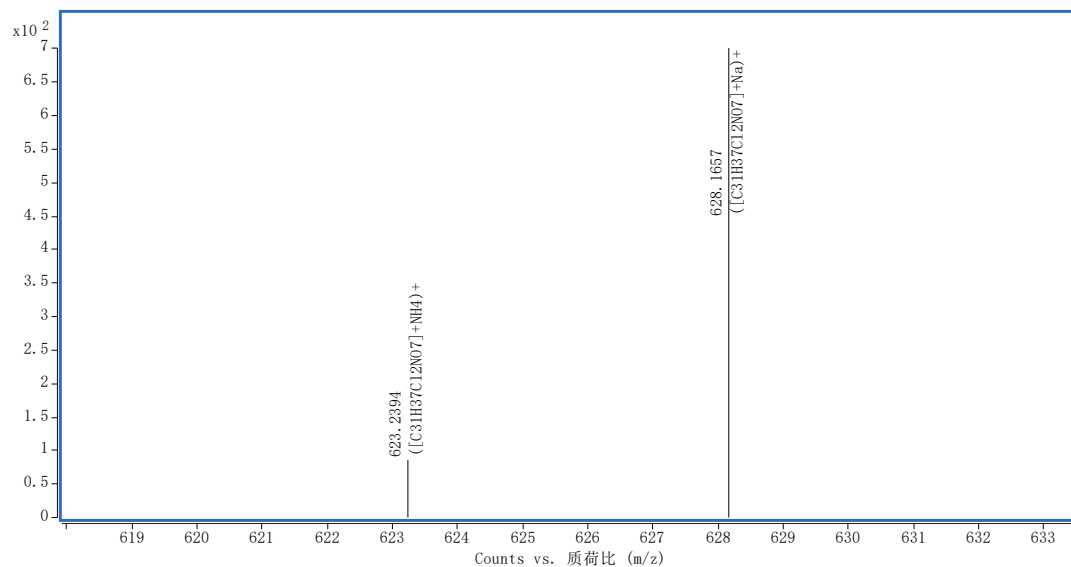

**Figure S43. HRMS spectra of**  
**5,6-dihydroxy-4,4-dimethyl-8-methylene-1,7-dioxododecahydro-1H-6,11b-**  
**(epoxymethano)-6a,9-methanocyclohepta[a]naphthalen-14-yl 2-(4-(bis(2-**  
**chloroethyl)amino)phenyl)acetate (1f)**

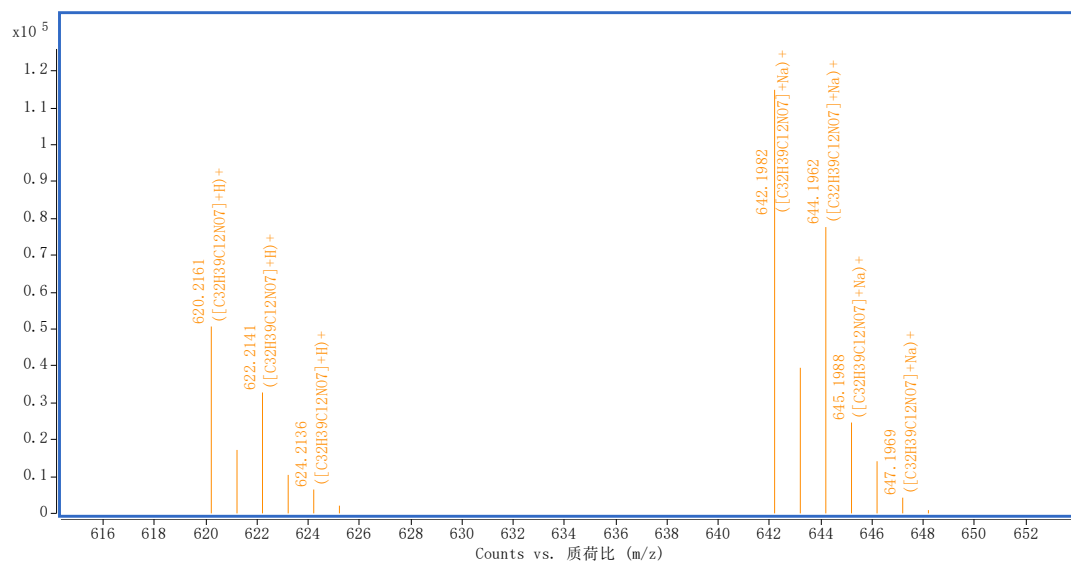

**Figure S44. HRMS spectra of**  
**5,6-dihydroxy-4,4-dimethyl-8-methylene-1,7-dioxododecahydro-1H-6,11b-**  
**(epoxymethano)-6a,9-methanocyclohepta[a]naphthalen-14-yl adamantane-1-**  
**carboxylate (1g)**

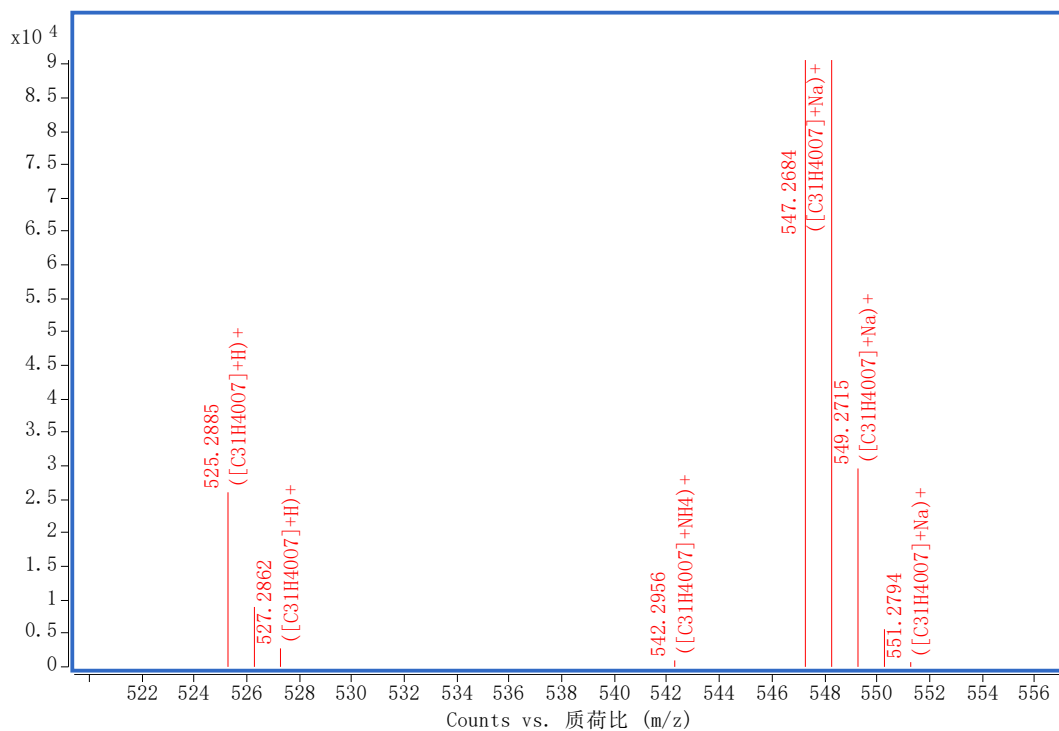

**Figure S45.** HRMS spectra of  
**5,6-dihydroxy-4,4-dimethyl-8-methylene-1,7-dioxododecahydro-1H-6,11b-**  
**(epoxymethano)-6a,9-methanocyclohepta[a]naphthalen-14-yl (E)-3-(4-**  
**(dimethylamino)phenyl)acrylate (1h)**

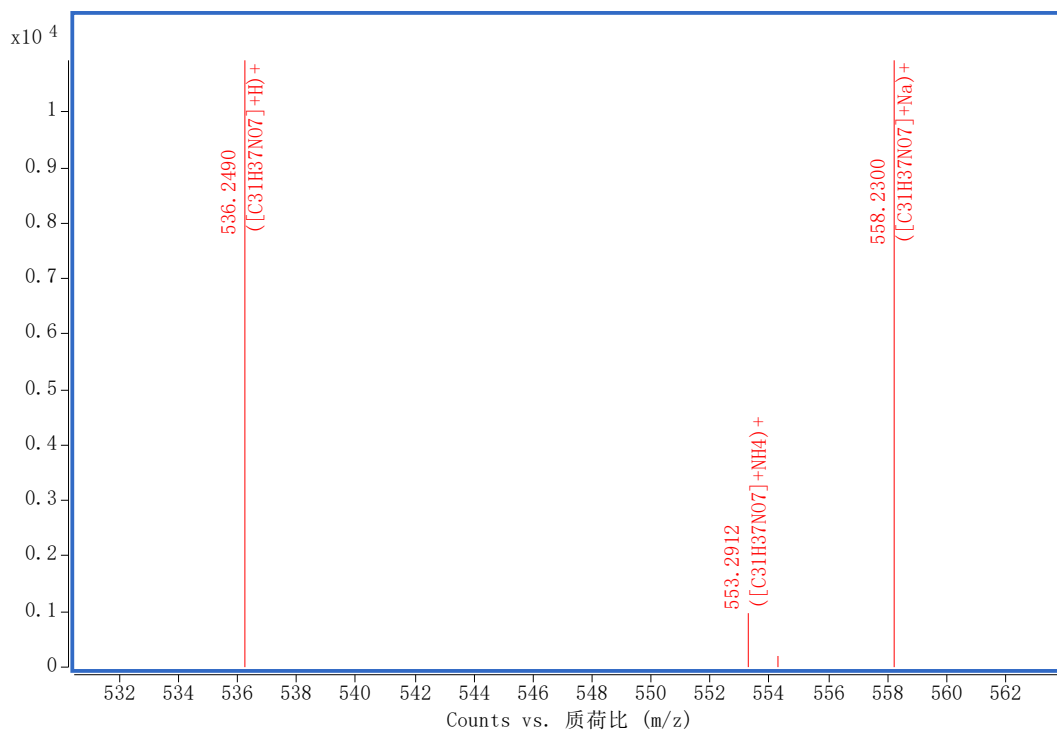

**Figure S46.** HRMS spectra of  
**4,4-dimethyl-8-methylene-1,6,7-trioxododecahydro-1H-5,11b-(epoxymethano)-**  
**6a,9-methanocyclohepta[a]naphthalen-14-yl 2-(3,4,5-trimethoxyphenyl)acetate**  
**(2a)**

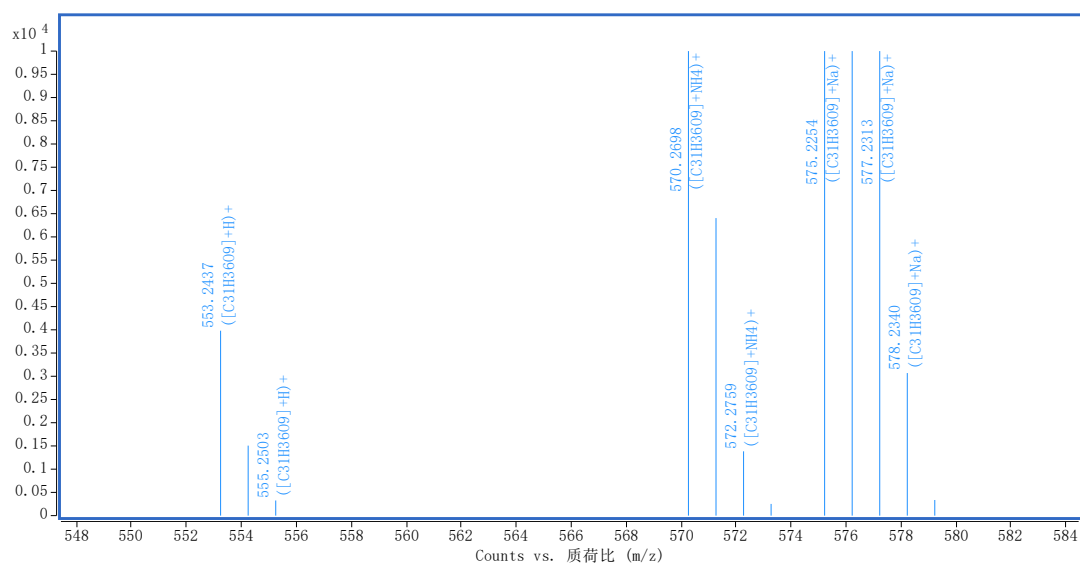

**Figure S47.** HRMS spectra of **4,4-dimethyl-8-methylene-1,6,7-trioxododecahydro-1H-5,11b-(epoxymethano)-6a,9-methanocyclohepta[a]naphthalen-14-yl 2-(3,4-dimethoxyphenyl)acetate (2b)**

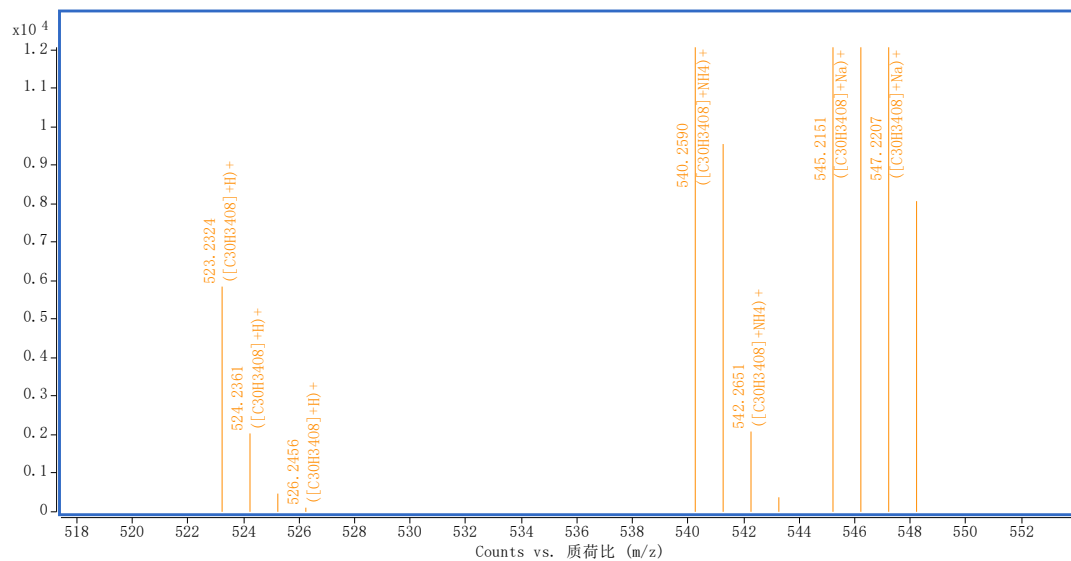

**Figure S48.** HRMS spectra of **4,4-dimethyl-8-methylene-1,6,7-trioxododecahydro-1H-5,11b-(epoxymethano)-6a,9-methanocyclohepta[a]naphthalen-14-yl 2-(4-methoxyphenyl)acetate (2c)**

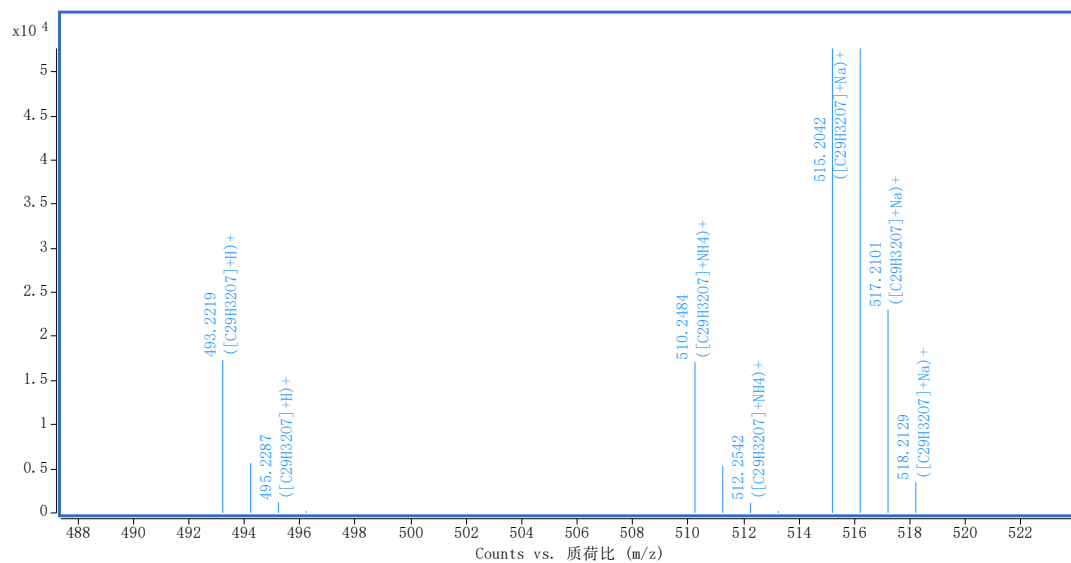



**Figure S49.** HRMS spectra of  
**4,4-dimethyl-8-methylene-1,6,7-trioxododecahydro-1H-5,11b-(epoxymethano)-6a,9-methanocyclohepta[a]naphthalen-14-yl 2-(2-bromophenyl)acetate (2d)**

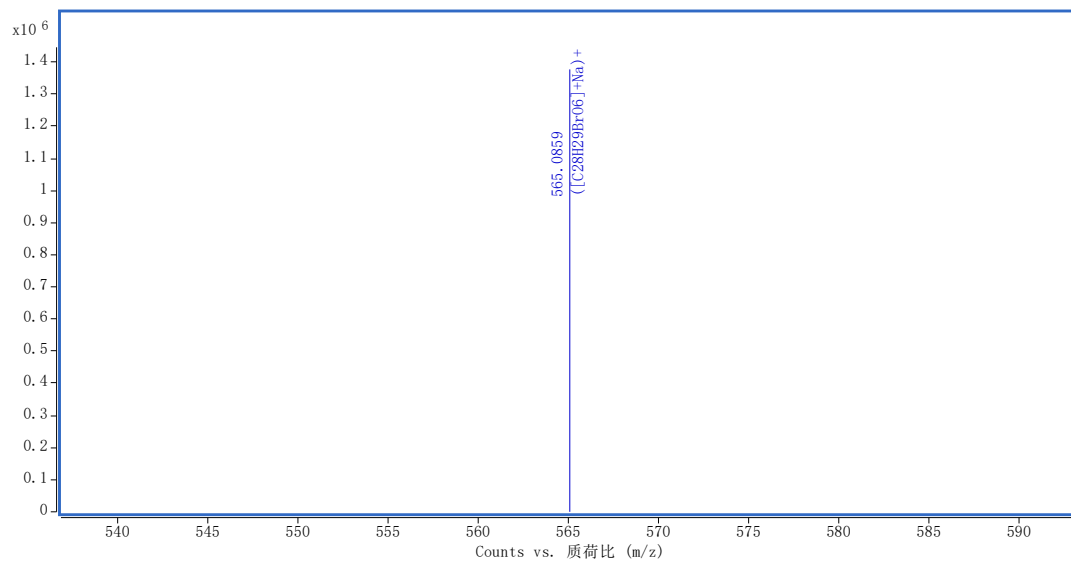

**Figure S50.** HRMS spectra of  
**4,4-dimethyl-8-methylene-1,6,7-trioxododecahydro-1H-5,11b-(epoxymethano)-6a,9-methanocyclohepta[a]naphthalen-14-yl 4-(bis(2-chloroethyl)amino)benzoate (2e)**

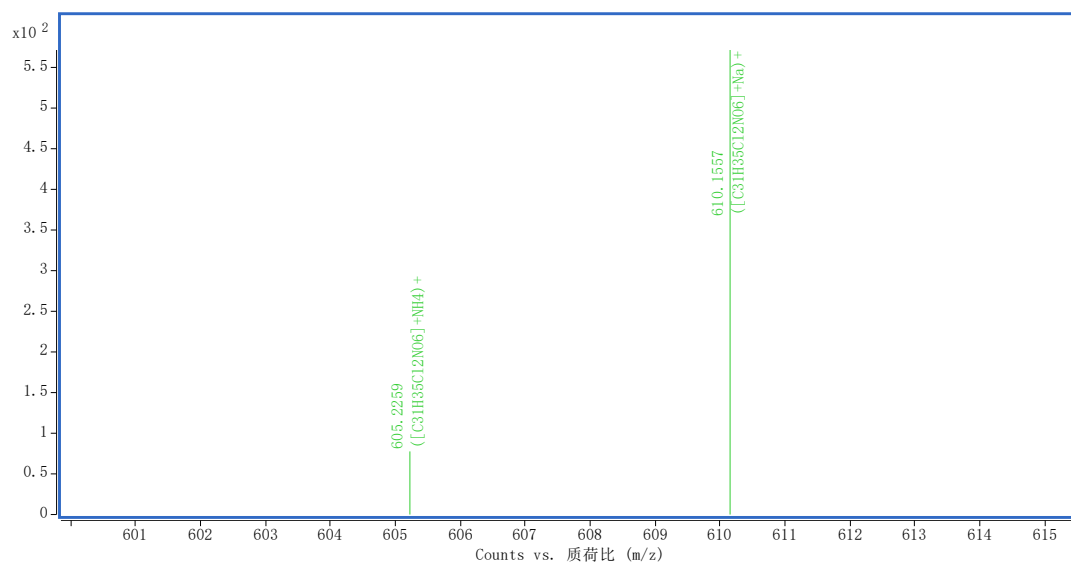

**Figure S51.** HRMS spectra of **4,4-dimethyl-8-methylene-1,6,7-trioxododecahydro-1H-5,11b-(epoxymethano)-6a,9-methanocyclohepta[a]naphthalen-14-yl 2-(4-(bis(2-chloroethyl)amino)phenyl)acetate (2f)**

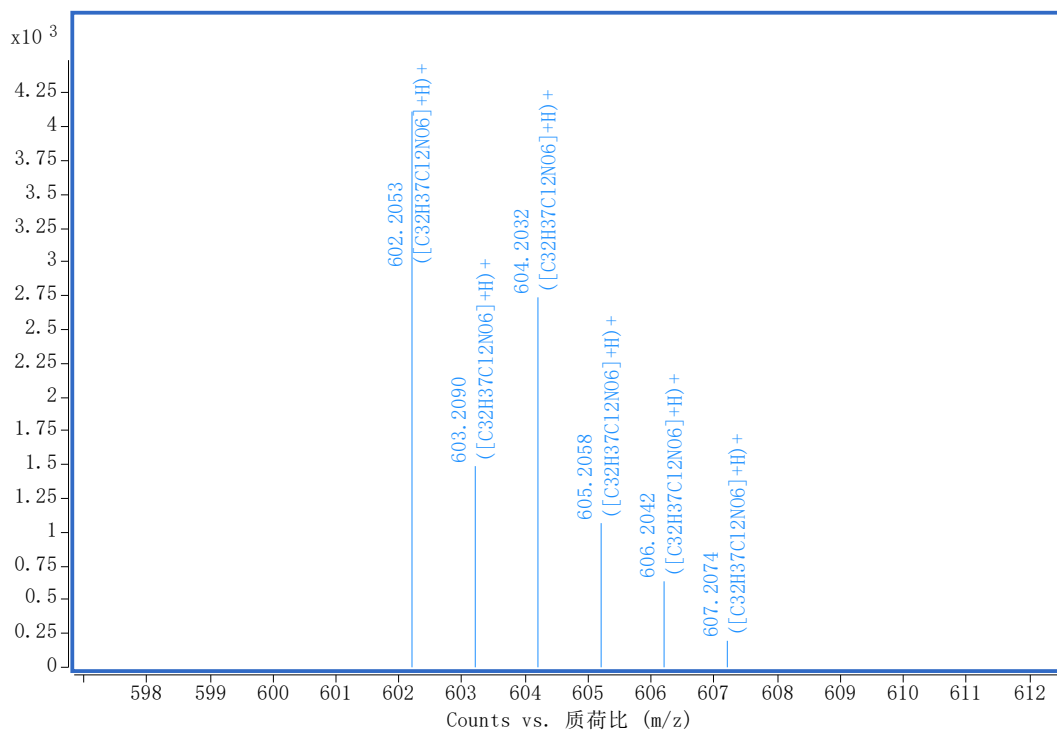

**Figure S52.** HRMS spectra of **4,4-dimethyl-8-methylene-1,6,7-trioxododecahydro-1H-5,11b-(epoxymethano)-6a,9-methanocyclohepta[a]naphthalen-14-yl adamantane-1-carboxylate (2g)**

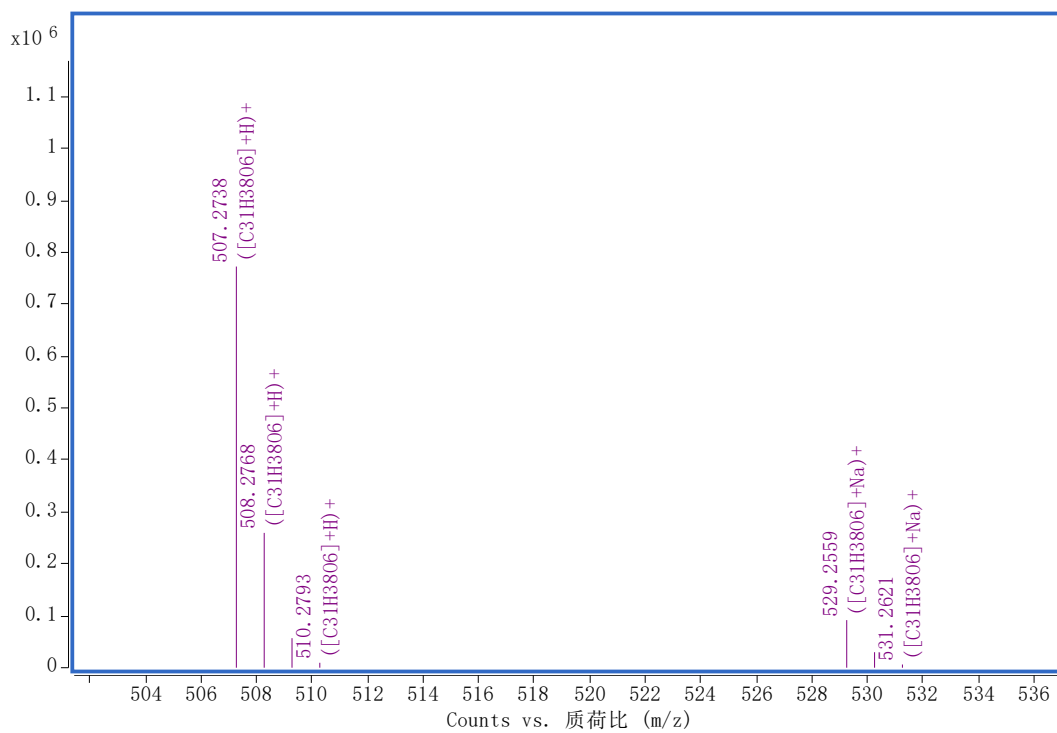

**Figure S53.** HRMS spectra of **5,6,14-trihydroxy-4,4-dimethyl-8-methylene-4,4a,5,6,9,10,11,11a-octahydro-3H-6,11b-(epoxymethano)-6a,9-methanocyclohepta[a]naphthalen-7(8H)-one (6)**

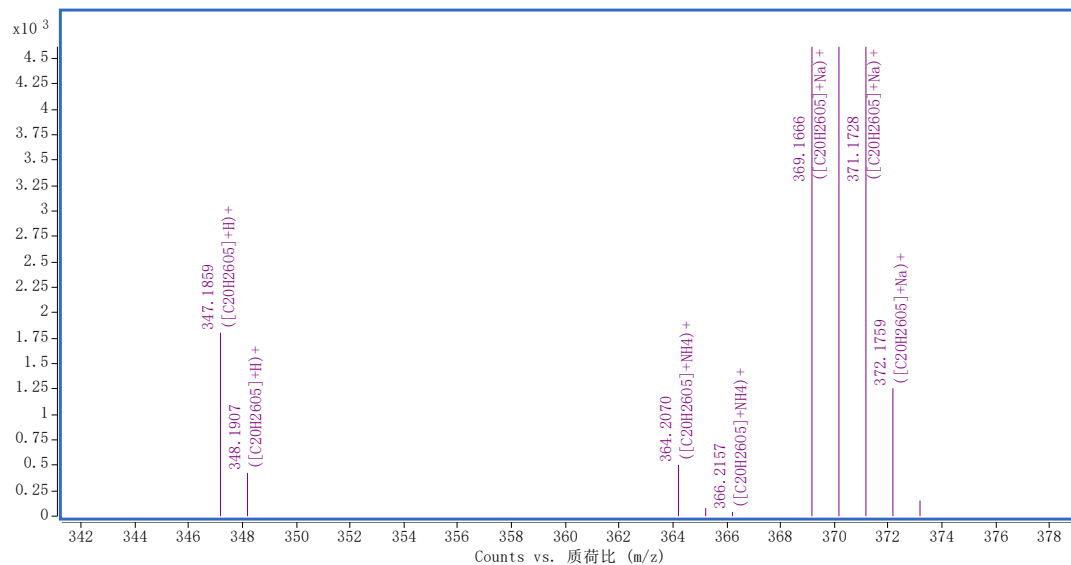

**Figure S54.** HRMS spectra of **5,6-dihydroxy-4,4-dimethyl-8-methylene-7-oxo-4,4a,5,6,7,8,9,10,11,11a-decahydro-3H-6,11b-(epoxymethano)-6a,9-methanocyclohepta[a]naphthalen-14-yl 2-(3,4,5-trimethoxyphenyl)acetate (6a)**

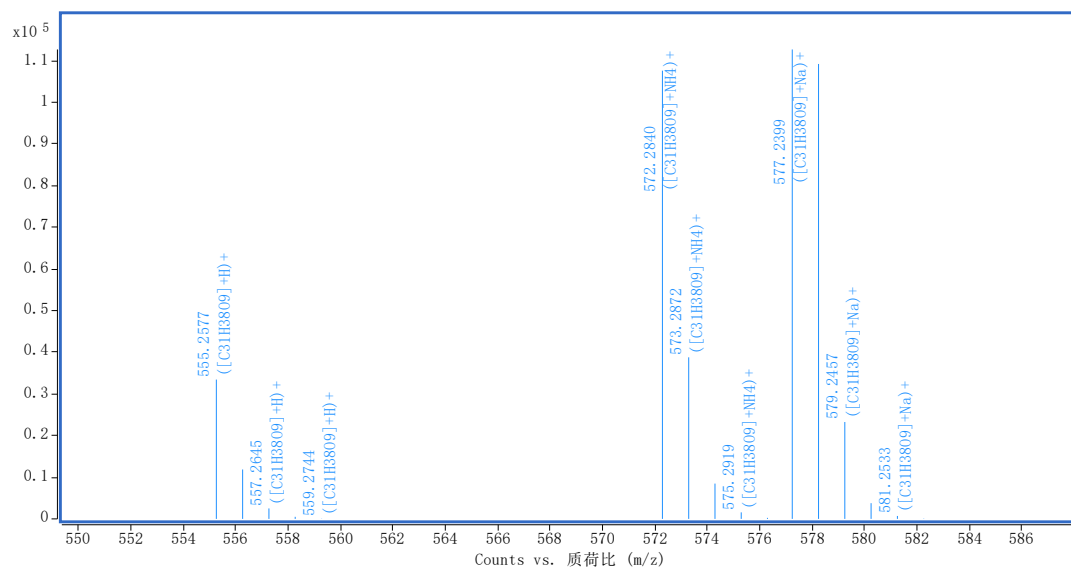

**Figure S55.** HRMS spectra of **5,6-dihydroxy-4,4-dimethyl-8-methylene-7-oxo-4,4a,5,6,7,8,9,10,11,11a-decahydro-3H-6,11b-(epoxymethano)-6a,9-methanocyclohepta[a]naphthalen-14-yl 2-(3,4-dimethoxyphenyl)acetate (6b)**

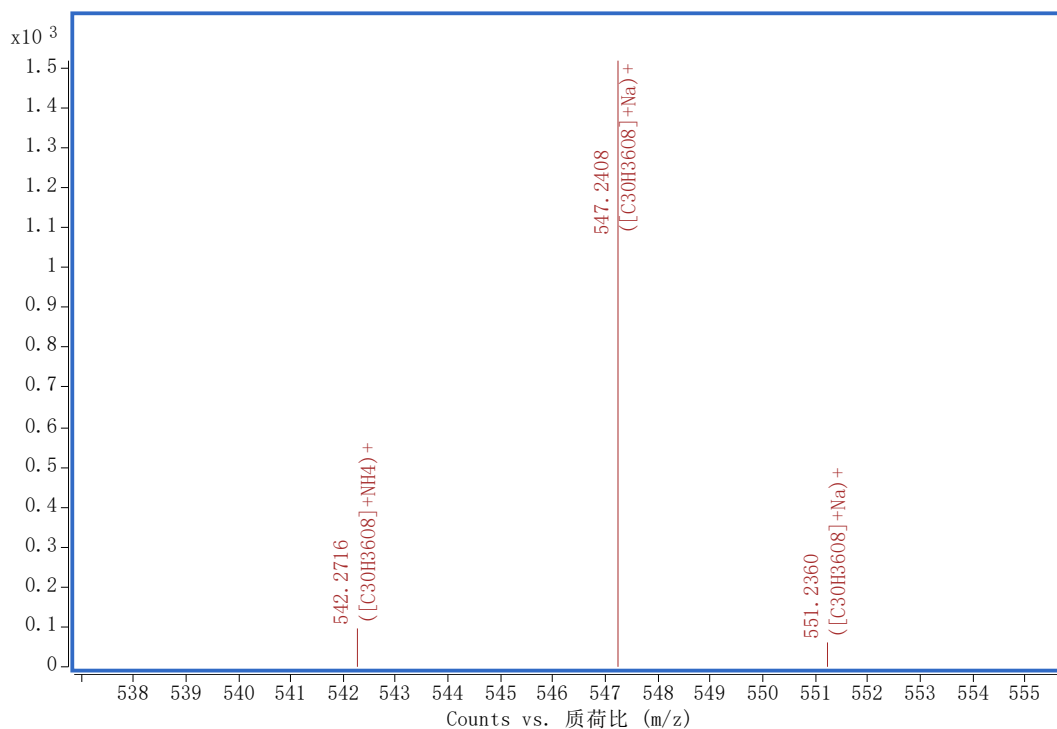

**Figure S56.** HRMS spectra of **5,6-dihydroxy-4,4-dimethyl-8-methylene-7-oxo-4,4a,5,6,7,8,9,10,11,11a-decahydro-3H-6,11b-(epoxymethano)-6a,9-methanocyclohepta[a]naphthalen-14-yl 2-(4-methoxyphenyl)acetate (6c)**

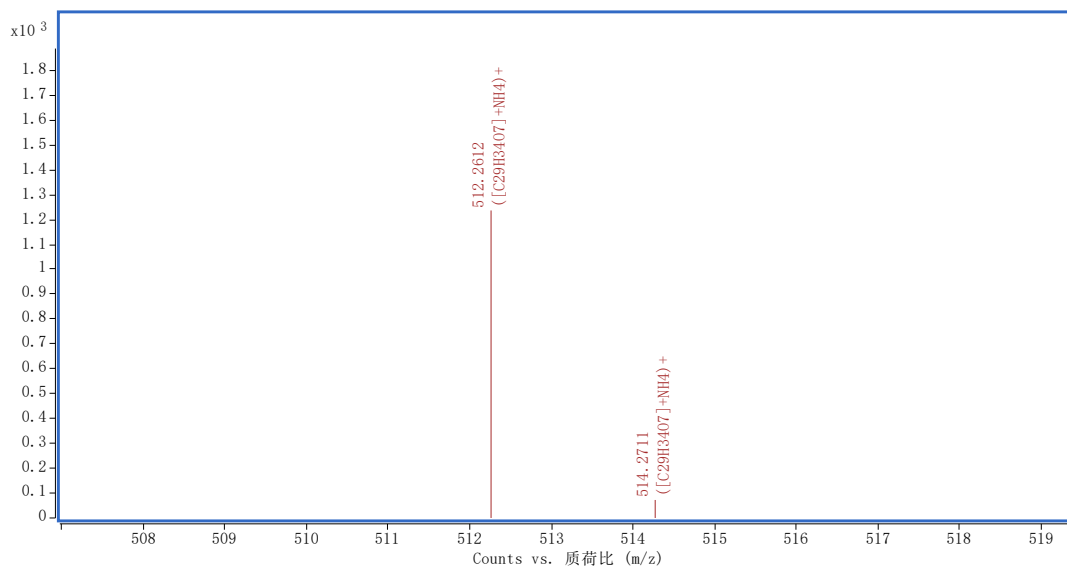

**Figure S57.** HRMS spectra of **5,6-dihydroxy-4,4-dimethyl-8-methylene-7-oxo-4,4a,5,6,7,8,9,10,11,11a-decahydro-3H-6,11b-(epoxymethano)-6a,9-methanocyclohepta[a]naphthalen-14-yl adamantane-1-carboxylate (6d)**

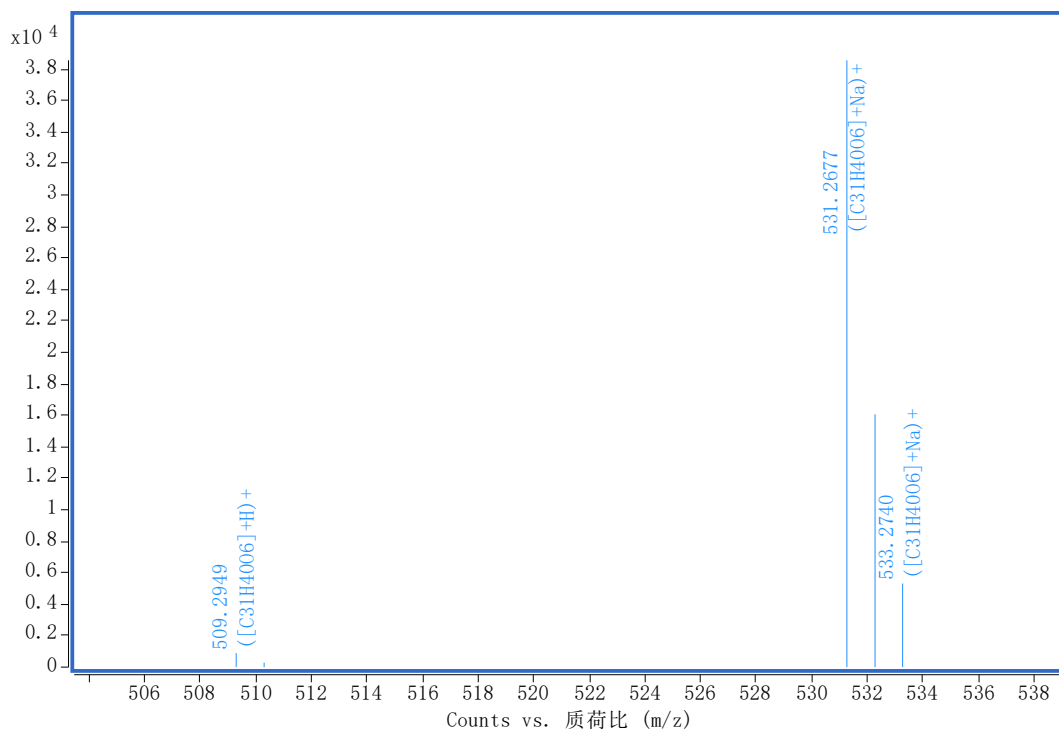

**Figure S58.** HRMS spectra of **5,6-dihydroxy-4,4-dimethyl-8-methylene-7-oxo-4,4a,5,6,7,8,9,10,11,11a-decahydro-3H-6,11b-(epoxymethano)-6a,9-methanocyclohepta[a]naphthalen-14-yl 4-(bis(2-chloroethyl)amino)benzoate (6e).**

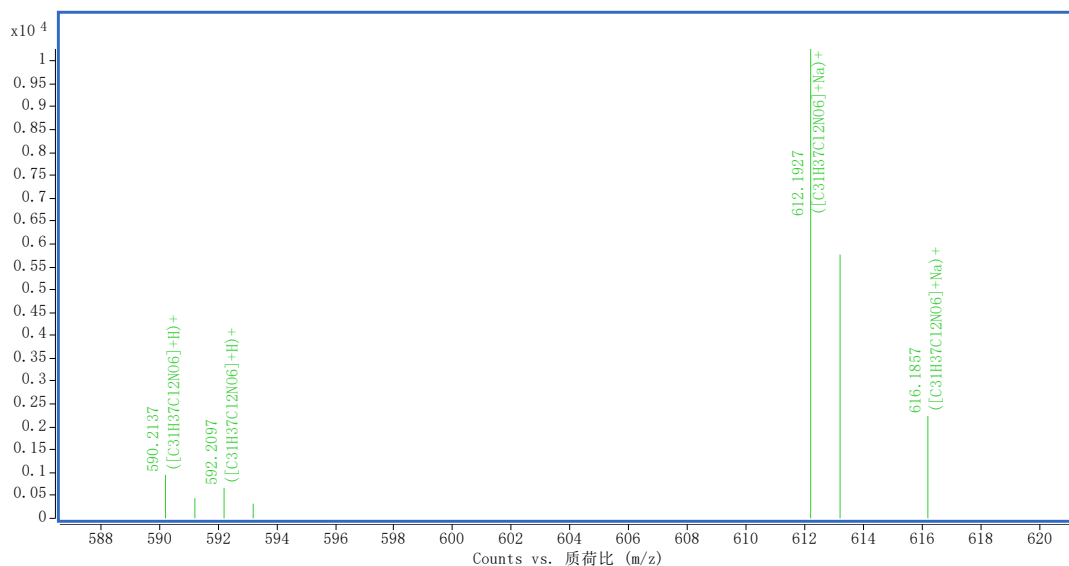

**Figure S59.** HRMS spectra of  
**14-hydroxy-4,4-dimethyl-8-methylene-3,4,4a,5,9,10,11,11a-octahydro-6H-5,11b-(epoxymethano)-6a,9-methanocyclohepta[a]naphthalene-6,7(8H)-dione (7)**

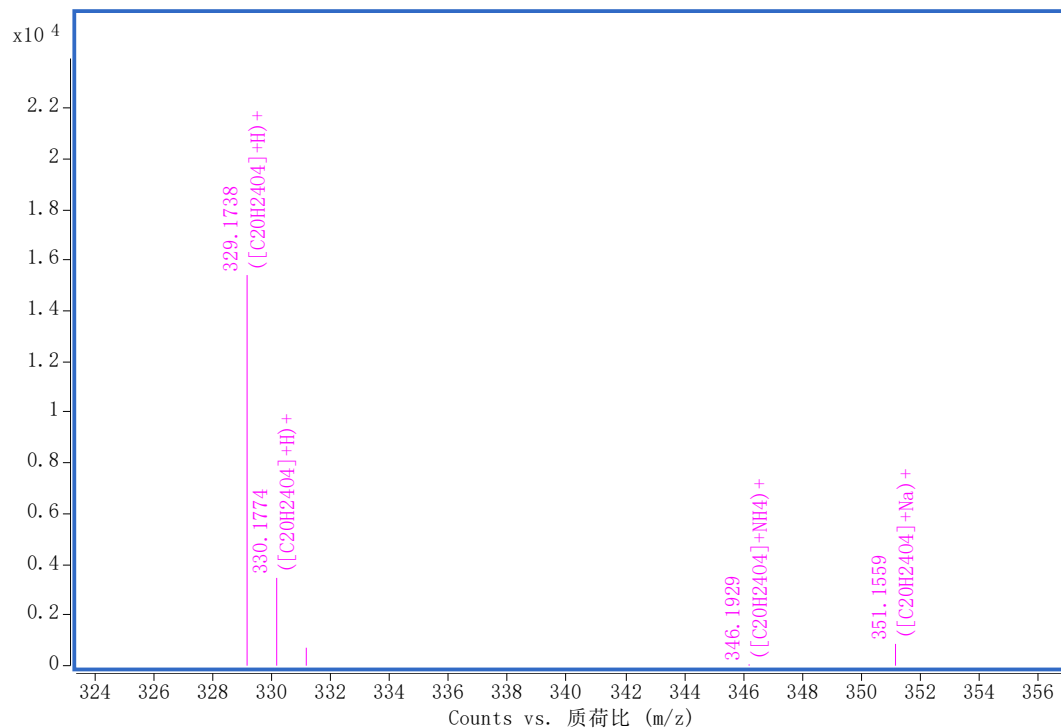

**Figure S60.** HRMS spectra of  
**4,4-dimethyl-8-methylene-6,7-dioxo-4,4a,5,6,7,8,9,10,11,11a-decahydro-3H-5,11b-(epoxymethano)-6a,9-methanocyclohepta[a]naphthalen-14-yl 2-(3,4,5-trimethoxyphenyl)acetate (7a)**

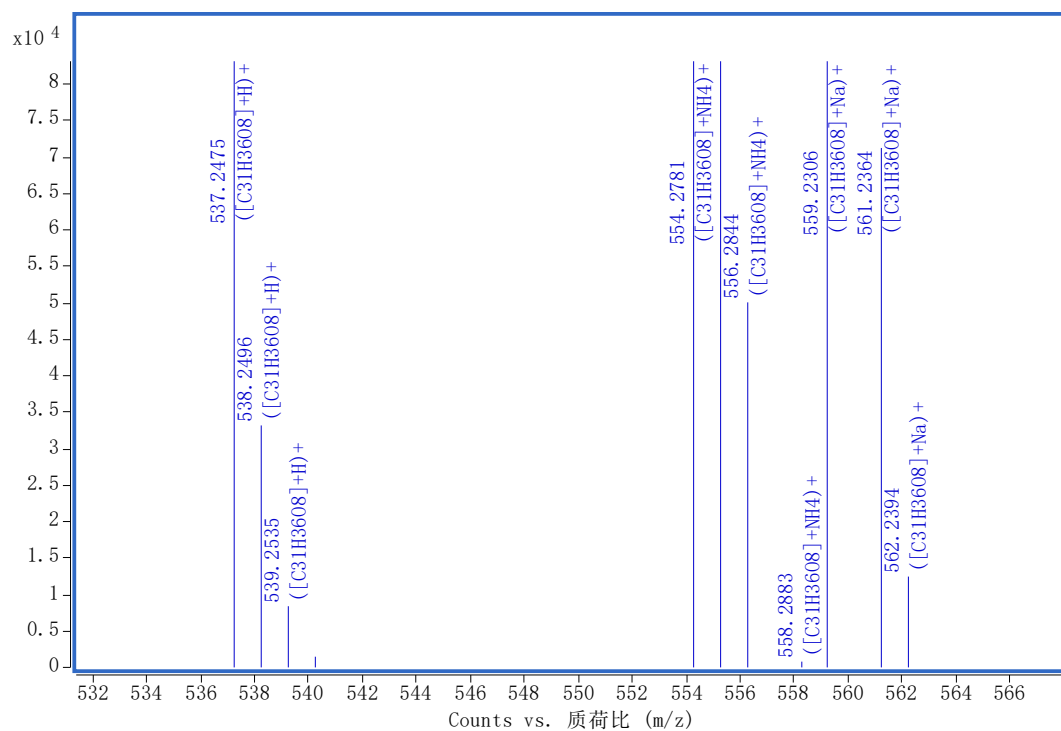

**Figure S61.** HRMS spectra of **4,4-dimethyl-8-methylene-6,7-dioxo-4,4a,5,6,7,8,9,10,11,11a-decahydro-3H-5,11b-(epoxymethano)-6a,9-methanocyclohepta[a]naphthalen-14-yl adamantane-1-carboxylate (7d).**

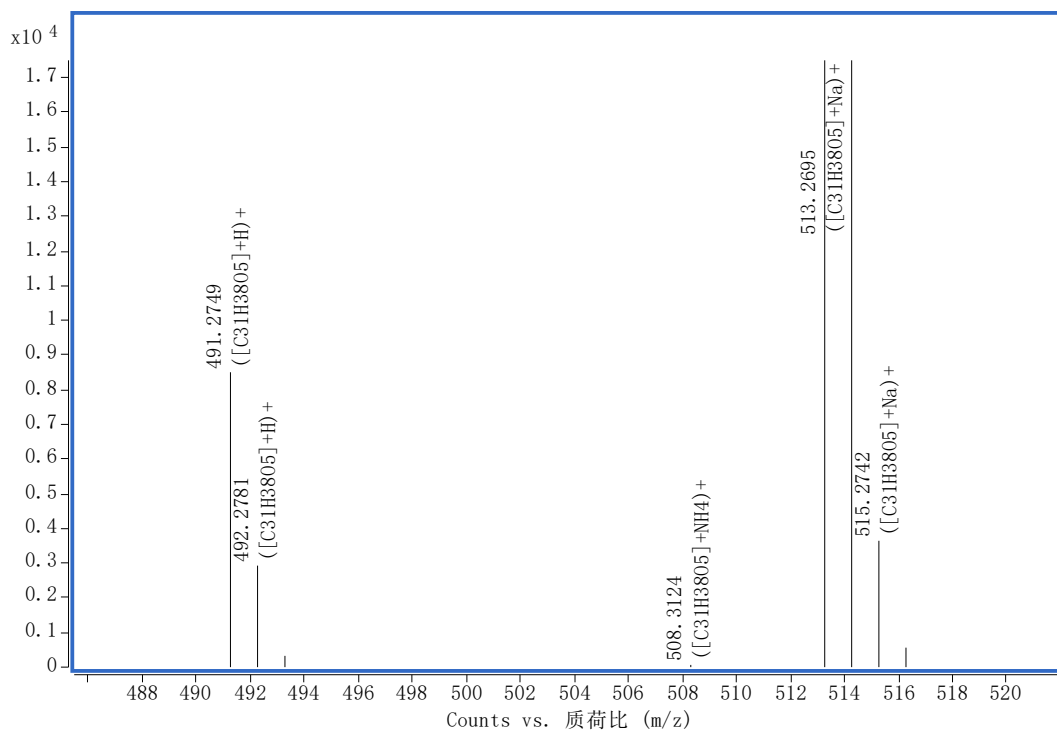

**Figure S62.** HRMS spectra of **4,4-dimethyl-8-methylene-6,7-dioxo-4,4a,5,6,7,8,9,10,11,11a-decahydro-3H-5,11b-(epoxymethano)-6a,9-methanocyclohepta[a]naphthalen-14-yl 4-(bis(2-chloroethyl)amino)benzoate (7e)**

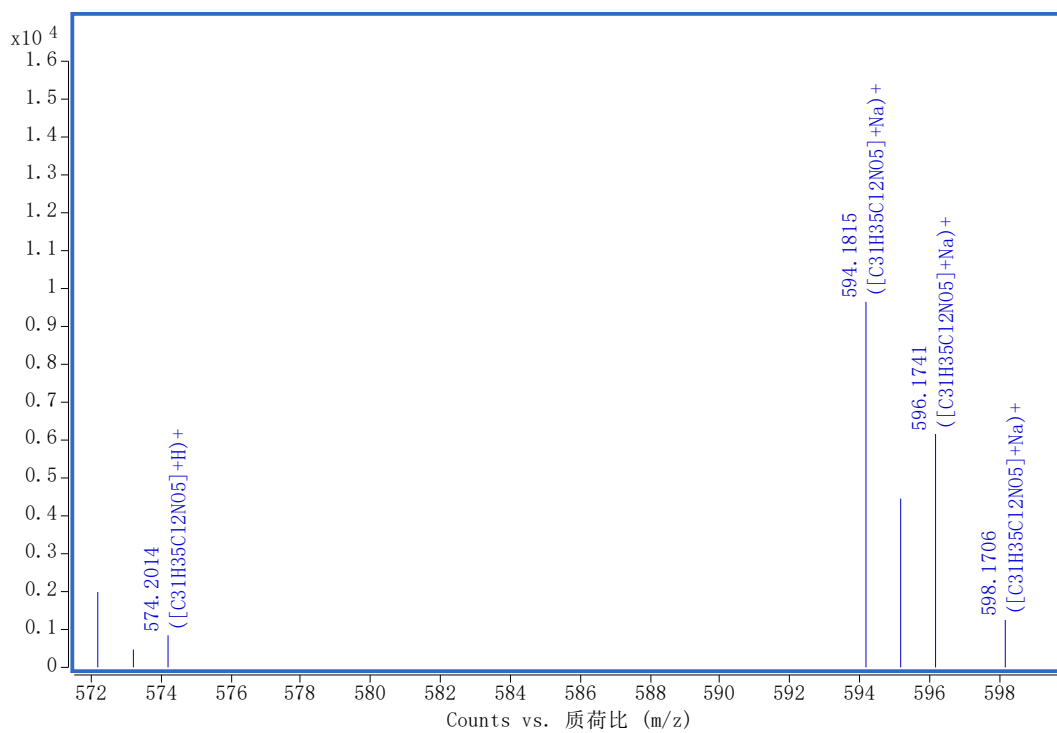

**Figure S63.** HRMS spectra of **5,6,14-trihydroxy-4,4-dimethyl-8-methylene-7-oxododecahydro-1H-6,11b-(epoxymethano)-6a,9-methanocyclohepta[a]naphthalen-1-yl acetate (9)**.

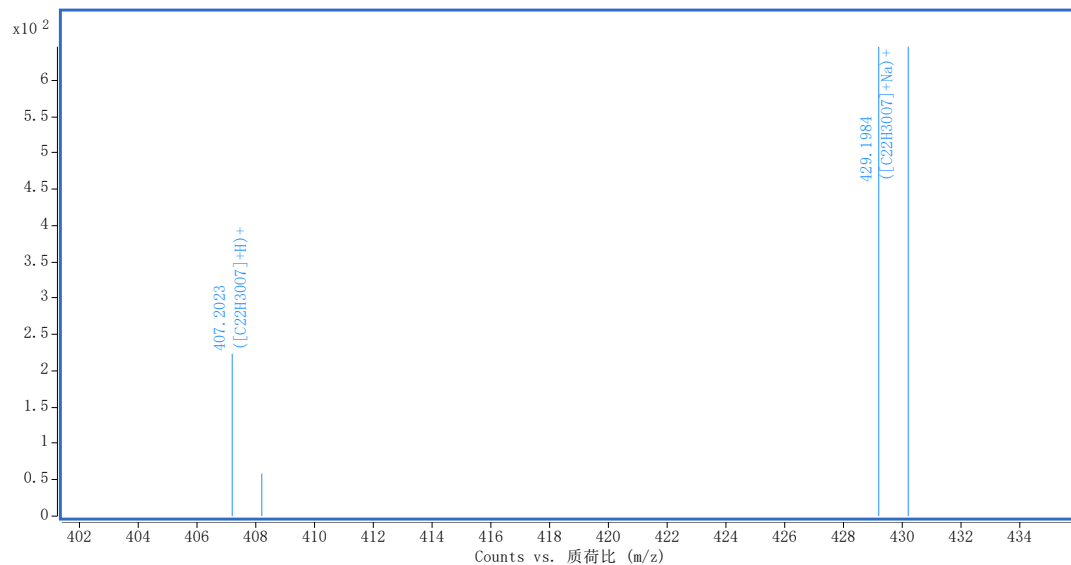

**Figure S64.** HRMS spectra of **1-acetoxy-5,6-dihydroxy-4,4-dimethyl-8-methylene-7-oxododecahydro-1H-6,11b-(epoxymethano)-6a,9-methanocyclohepta[a]naphthalen-14-yl adamantane-1-carboxylate (9a)**.

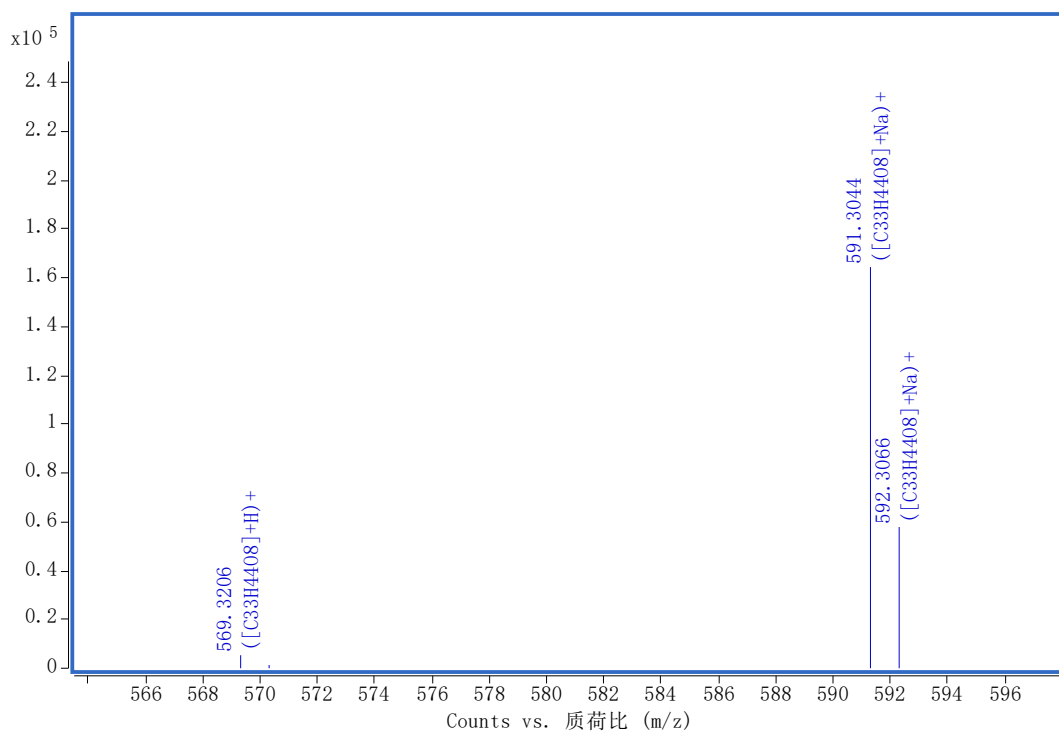



**Figure S65.** HRMS spectra of  
**1-acetoxy-4,4-dimethyl-8-methylene-6,7-dioxododecahydro-1H-5,11b-**  
**(epoxymethano)-6a,9-methanocyclohepta[a]naphthalen-14-yl adamantane-1-**  
**carboxylate (10a)**

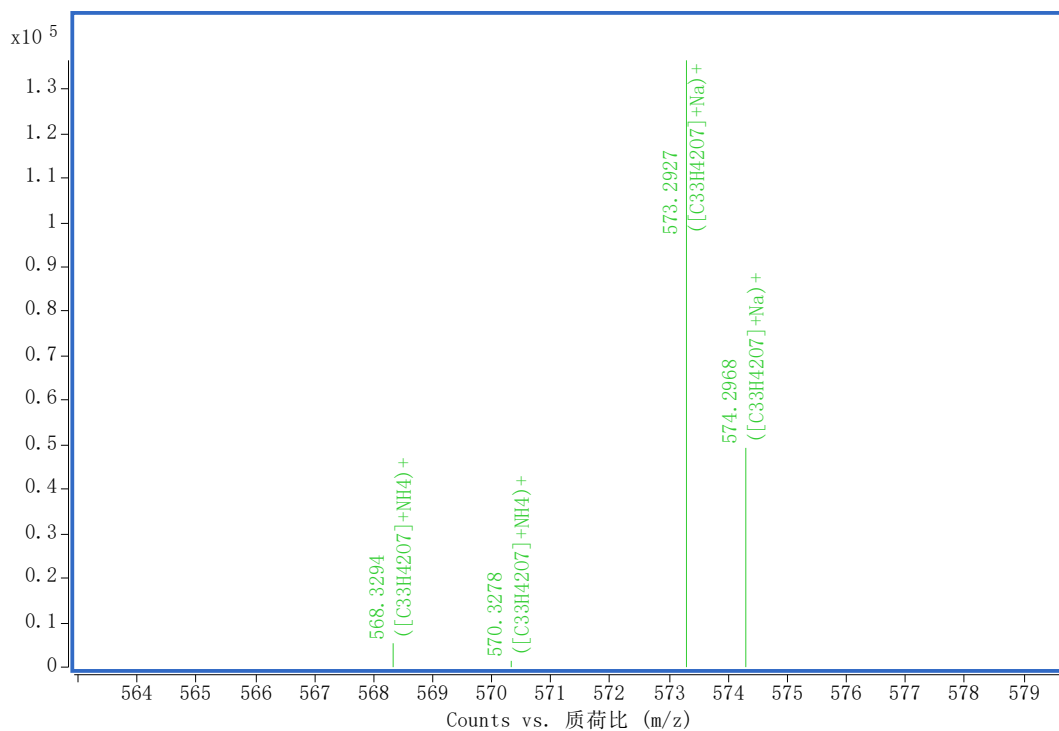

**Figure S66.** HRMS spectra of  
**1,5,6-Trihydroxy-4,4-dimethyl-8-methylene-7-oxododecahydro-1H-6,11b-**  
**(epoxymethano)-6a,9-methanocyclohepta[a]naphthalen-14-yl adamantane-1-**  
**carboxylate (11a)**

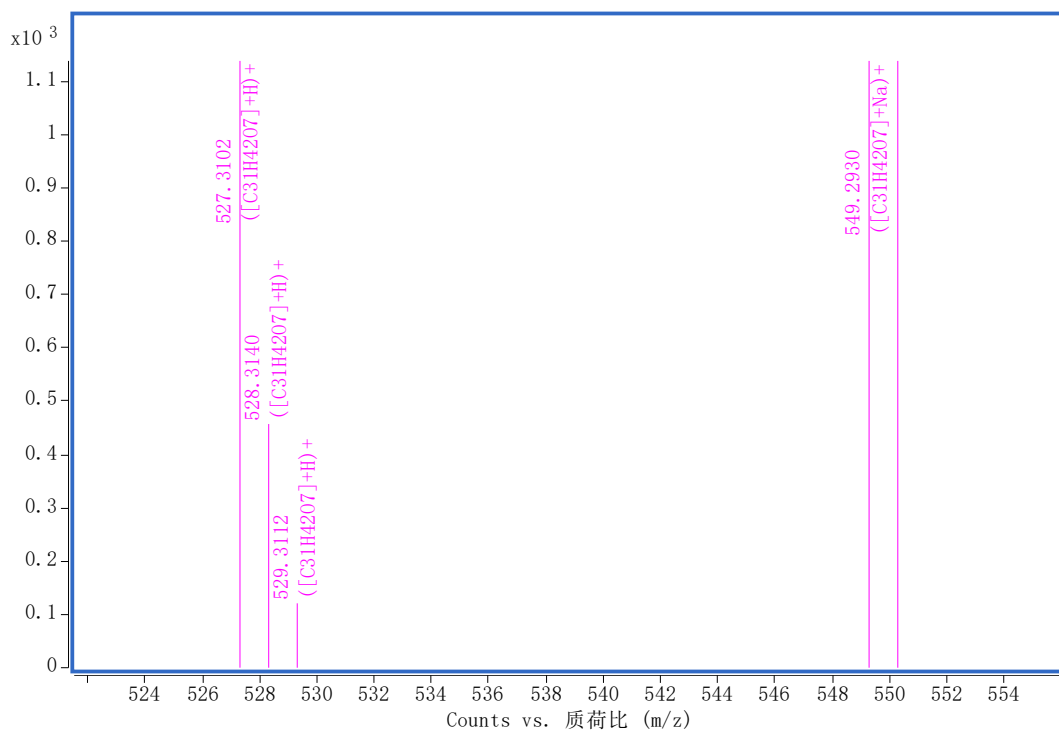

**Figure S67.** HRMS spectra of  
**1,5,6-trihydroxy-4,4-dimethyl-8-methylene-7-oxododecahydro-1H-6,11b-**  
**(epoxymethano)-6a,9-methanocyclohepta[a]naphthalen-14-yl 4-(bis(2-**  
**chloroethyl)amino)benzoate (11b)**

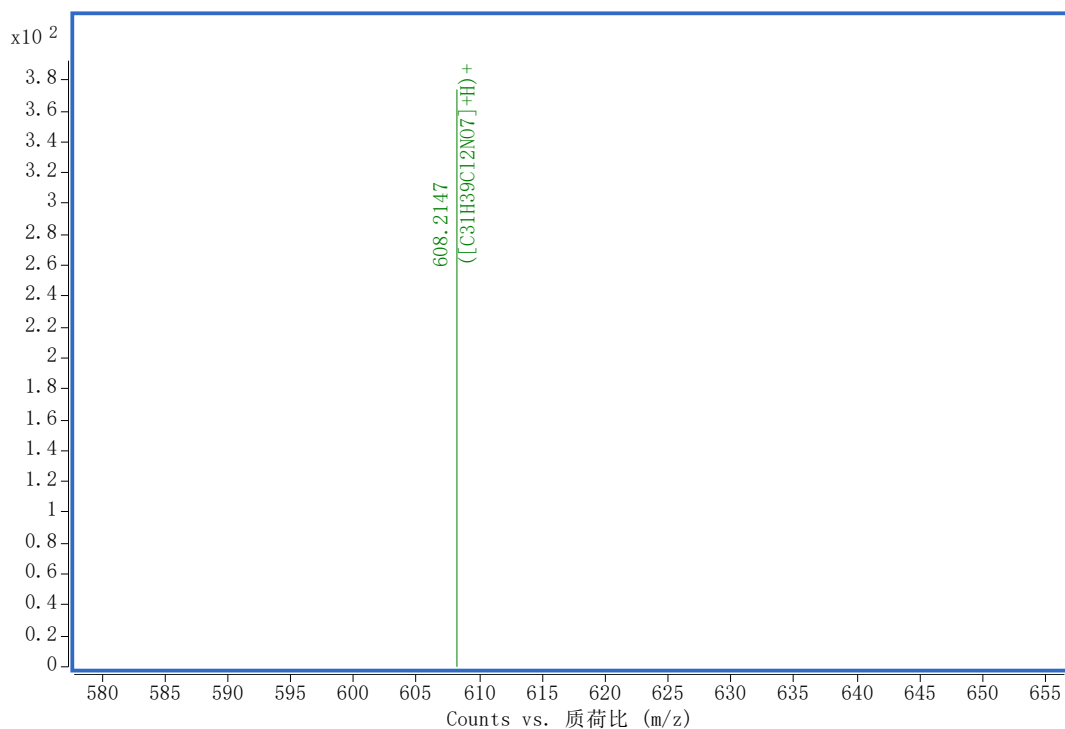

**Figure S68.** HRMS spectra of  
**1-hydroxy-4,4-dimethyl-8-methylene-6,7-dioxododecahydro-1H-5,11b-**  
**(epoxymethano)-6a,9-methanocyclohepta[a]naphthalen-14-yl adamantane-1-**  
**carboxylate (12a)**

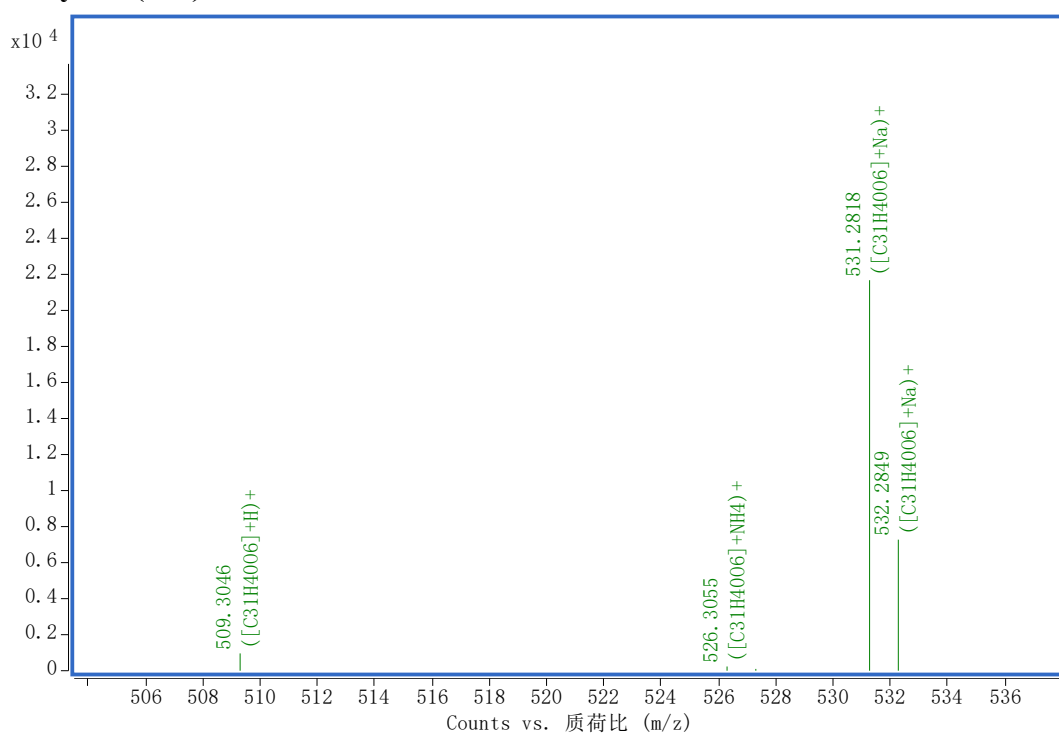

**Figure S69.** HRMS spectra of **1-hydroxy-4,4-dimethyl-8-methylene-6,7-dioxododecahydro-1H-5,11b-(epoxymethano)-6a,9-methanocyclohepta[a]naphthalen-14-yl 4-(bis(2-chloroethyl)amino)benzoate (12b)**

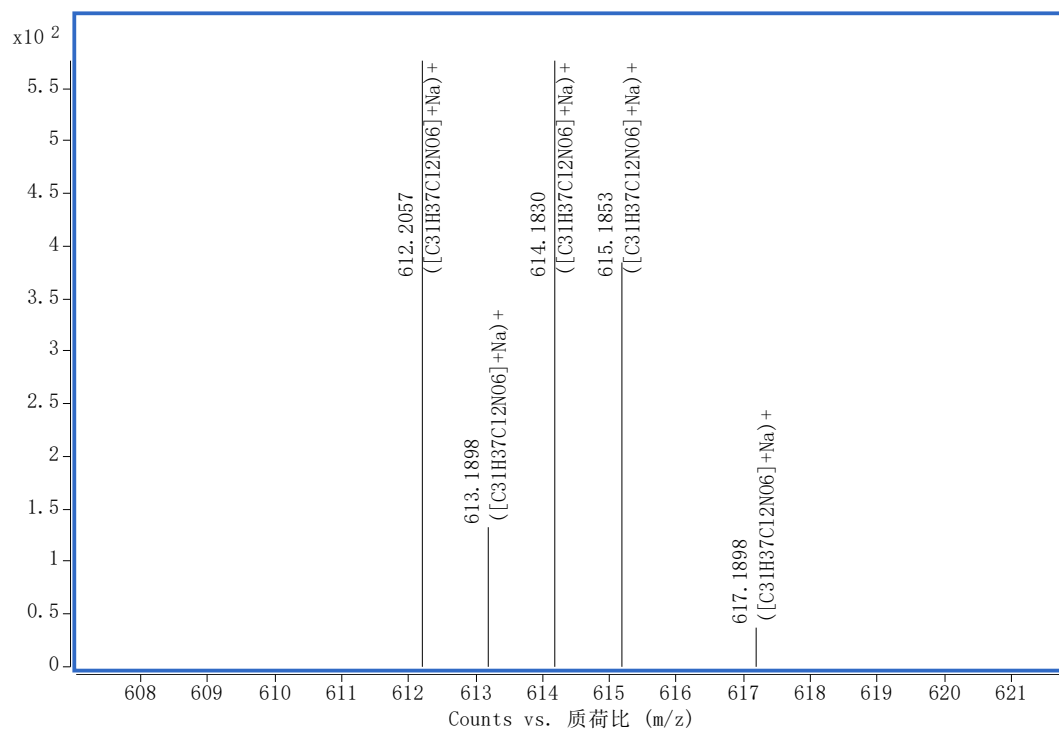

**Figure S70.** HPLC-purity spectra of **5,6,14-trihydroxy-4,4-dimethyl-8-methylene-4,4a,5,6,9,10,11,11a-octahydro-3H-6,11b-(epoxymethano)-6a,9-methanocyclohepta[a]naphthalen-7(8H)-one (6)**

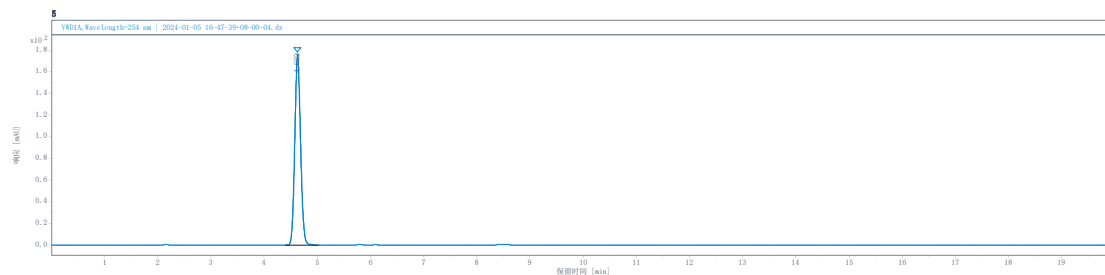

| RT (min) | A (mAU·s) | A %     | H (mAU) | H%     |
|----------|-----------|---------|---------|--------|
| 4.622    | 1331.522  | 100.000 | 176.940 | 100.00 |

**Figure S71.** HPLC-purity spectra of **1-acetoxy-5,6-dihydroxy-4,4-dimethyl-8-methylene-7-oxododecahydro-1H-6,11b-(epoxymethano)-6a,9-methanocyclohepta[a]naphthalen-14-yl adamantane-1-carboxylate (9a)**

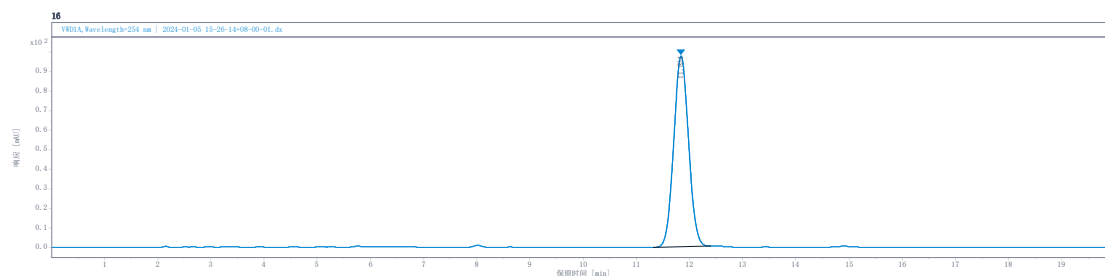

| RT (min) | A (mAU·s) | A %     | H (mAU) | H%     |
|----------|-----------|---------|---------|--------|
| 11.834   | 1897.914  | 100.000 | 97.914  | 100.00 |

**Figure S72.** HPLC-purity spectra of **1,5,6-Trihydroxy-4,4-dimethyl-8-methylene-7-oxododecahydro-1H-6,11b-(epoxymethano)-6a,9-methanocyclohepta[a]naphthalen-14-yl adamantane-1-carboxylate (11a)**

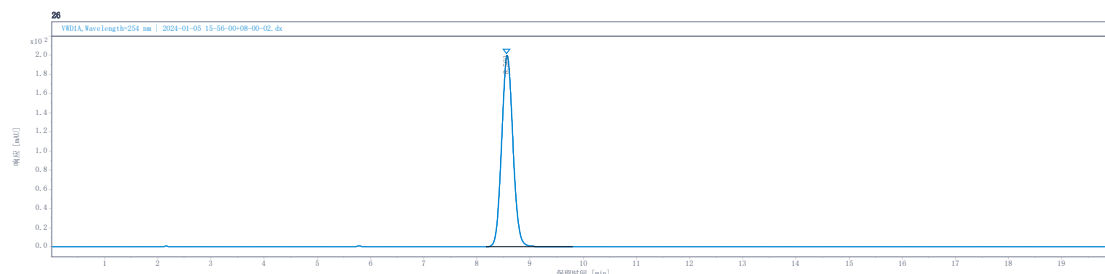

| RT (min) | A (mAU·s) | A %     | H (mAU) | H%     |
|----------|-----------|---------|---------|--------|
| 8.563    | 2941.279  | 100.000 | 200.100 | 100.00 |

**Table S1 Plasma stability of oridonin and compound 11a**

| Summary               |                  |             |                        |
|-----------------------|------------------|-------------|------------------------|
| Compound ID           | Time Point (min) | % Remaining | T <sub>1/2</sub> (min) |
|                       |                  | Human       | Human                  |
| Oridonin              | 0                | 100.0       | 143.8                  |
|                       | 10               | 60.6        |                        |
|                       | 30               | 47.5        |                        |
|                       | 60               | 39.8        |                        |
|                       | 120              | 31.8        |                        |
| 11a                   | 0                | 100.0       | 143.8                  |
|                       | 10               | 96.3        |                        |
|                       | 30               | 85.6        |                        |
|                       | 60               | 64.6        |                        |
|                       | 120              | 58.0        |                        |
| Propantheline bromide | 0                | 100.0       | 9.7                    |
|                       | 10               | 74.2        |                        |
|                       | 30               | 25.2        |                        |
|                       | 60               | 2.2         |                        |
|                       | 120              | 0.0         |                        |

| The Initial Report in Human Plasma |            |                   |              |        |                    |                   |
|------------------------------------|------------|-------------------|--------------|--------|--------------------|-------------------|
| Sample_ID                          | Time (min) | Analyte Peak Area | IS Peak Area | Aa/Ai  | % Remainin g (n=2) | Ln (% Remainin g) |
| Oridonin_H_0                       | 0          | 1.95E+05          | 3.07E+05     | 0.6335 | 100.0              | 0.00              |
| Oridonin_H_0                       |            | 1.53E+05          | 2.78E+05     | 0.5525 |                    |                   |
| Oridonin_H_10                      | 10         | 1.01E+05          | 2.74E+05     | 0.3688 | 60.6               | -0.50             |
| Oridonin_H_10                      |            | 9.62E+04          | 2.75E+05     | 0.3497 |                    |                   |
| Oridonin_H_30                      | 30         | 7.65E+04          | 2.72E+05     | 0.2811 | 47.5               | -0.74             |
| Oridonin_H_30                      |            | 7.64E+04          | 2.71E+05     | 0.2820 |                    |                   |
| Oridonin_H_60                      | 60         | 6.62E+04          | 2.71E+05     | 0.2443 | 39.8               | -0.92             |
| Oridonin_H_60                      |            | 6.32E+04          | 2.78E+05     | 0.2273 |                    |                   |
| Oridonin_H_120                     | 120        | 5.45E+04          | 2.99E+05     | 0.1820 | 31.8               | -1.15             |
| Oridonin_H_120                     |            | 5.21E+04          | 2.68E+05     | 0.1949 |                    |                   |
| 11a_H_0                            | 0          | 2.27E+05          | 2.76E+04     | 8.2170 | 100.0              | 0.00              |
| 11a_H_0                            |            | 2.19E+05          | 2.86E+04     | 7.6775 |                    |                   |
| 11a_H_10                           | 10         | 2.13E+05          | 2.64E+04     | 8.0600 | 96.3               | -0.04             |
| 11a_H_10                           |            | 2.17E+05          | 2.99E+04     | 7.2530 |                    |                   |
| 11a_H_30                           | 30         | 2.02E+05          | 3.01E+04     | 6.7357 | 85.6               | -0.16             |
| 11a_H_30                           |            | 1.91E+05          | 2.78E+04     | 6.8758 |                    |                   |
| 11a_H_60                           | 60         | 1.32E+05          | 3.01E+04     | 4.3945 | 64.6               | -0.44             |
| 11a_H_60                           |            | 1.75E+05          | 2.98E+04     | 5.8710 |                    |                   |
| 11a_H_120                          | 120        | 1.43E+05          | 2.96E+04     | 4.8163 | 58.0               | -0.54             |
| 11a_H_120                          |            | 1.35E+05          | 3.07E+04     | 4.4073 |                    |                   |
| Propantheline bromide_H_0          | 0          | 6.66E+06          | 2.41E+06     | 2.7626 | 100.0              | 0.00              |
| Propantheline bromide_H_0          |            | 6.66E+06          | 2.41E+06     | 2.7660 |                    |                   |
| Propantheline bromide_H_10         | 10         | 4.53E+06          | 2.40E+06     | 1.8922 | 70.1               | -0.35             |
| Propantheline bromide_H_10         |            | 4.82E+06          | 2.43E+06     | 1.9858 |                    |                   |
| Propantheline bromide_H_30         | 30         | 1.16E+06          | 2.47E+06     | 0.4713 | 18.9               | -1.67             |
| Propantheline bromide_H_30         |            | 1.37E+06          | 2.40E+06     | 0.5708 |                    |                   |
| Propantheline bromide_H_60         | 60         | 1.03E+05          | 2.44E+06     | 0.0421 | 1.5                | -4.19             |
| Propantheline bromide_H_60         |            | 1.01E+05          | 2.42E+06     | 0.0416 |                    |                   |
| Propantheline bromide_H_120        | 120        | 0.00E+00          | 2.40E+06     | 0.0000 | 0.1                |                   |
| Propantheline bromide_H_120        |            | 1.00E+04          | 2.44E+06     | 0.0041 |                    |                   |
