# Supplementary figures and images for: In vitro identification of oridonin hybrids as potential anti-TNBC agents inducing cell cycle arrest and apoptosis by regulation of p21, γH2AX and cleaved PARP
Source: Royal Society of Chemistry journal article supplement (doi:10.1039/d4md00580e), 2024-01-01

MDA-MB-231

16 h

25kD —

p21 21kD →

15kD —

40kD —

GAPDH 36kD →

25kD —

Repeat 1

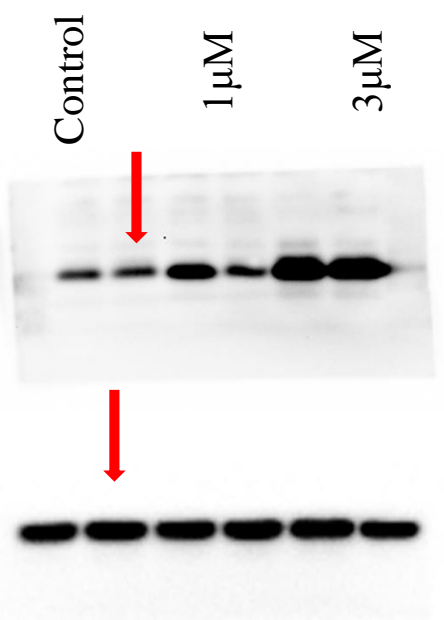

Repeat 2

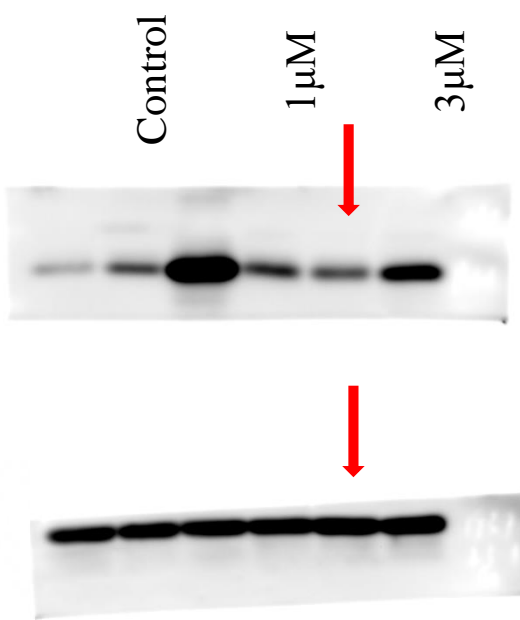

Repeat 3

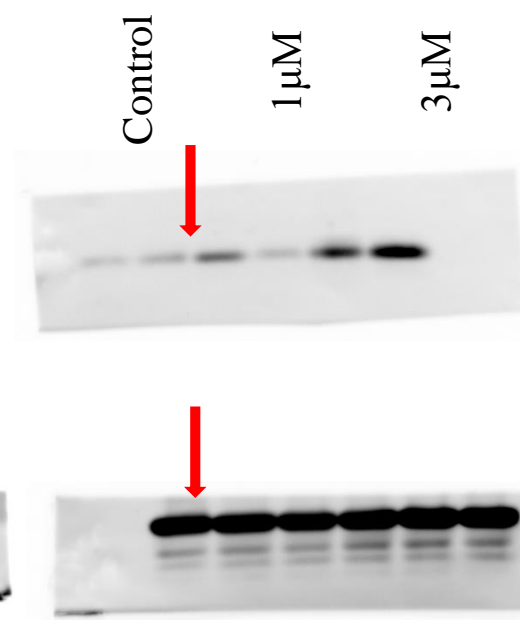

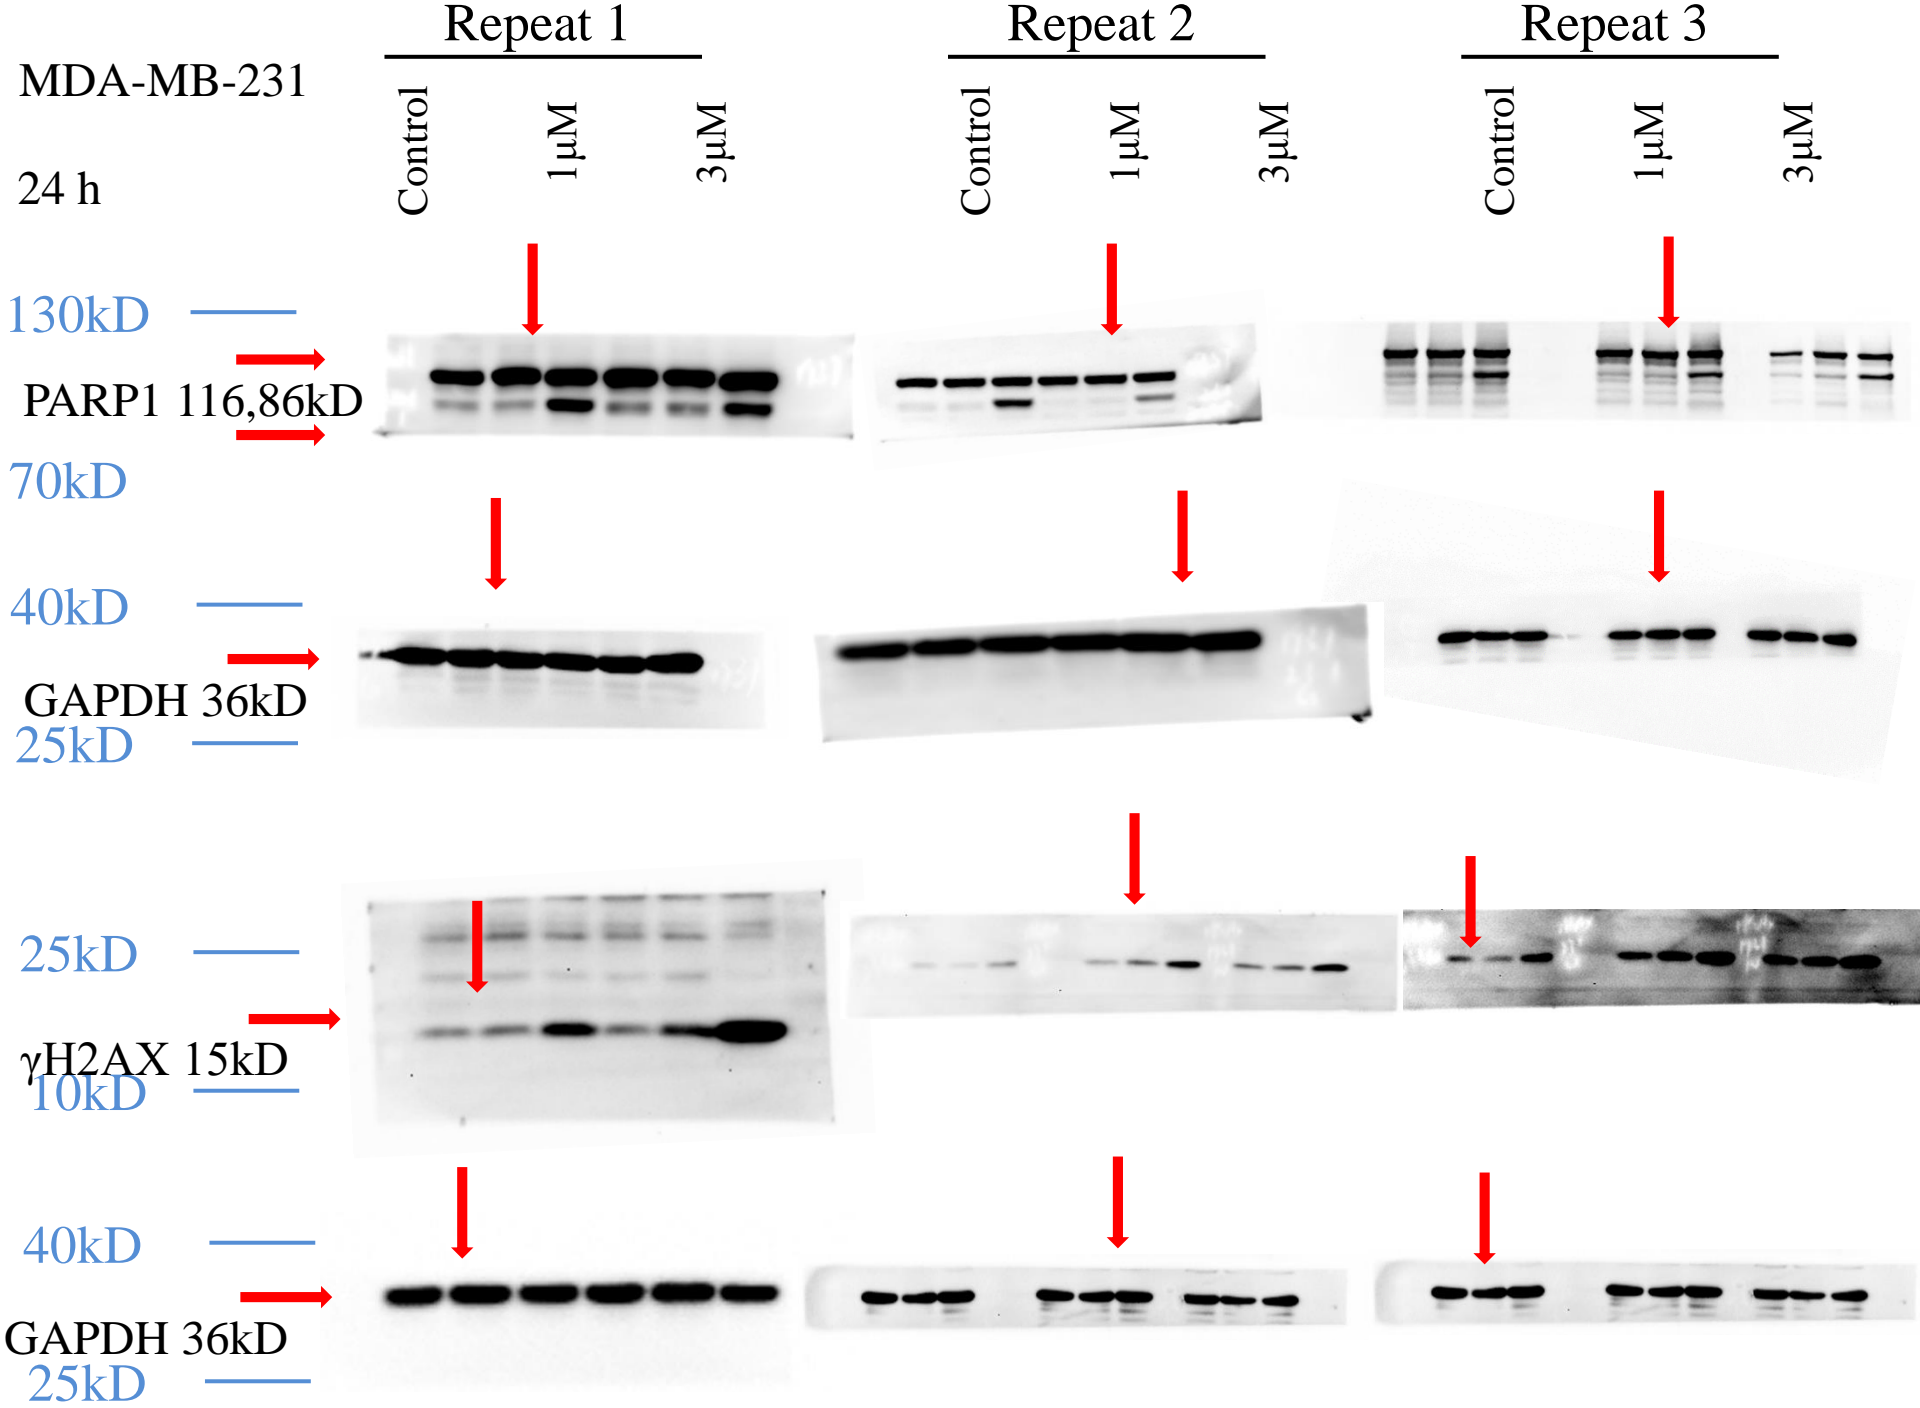

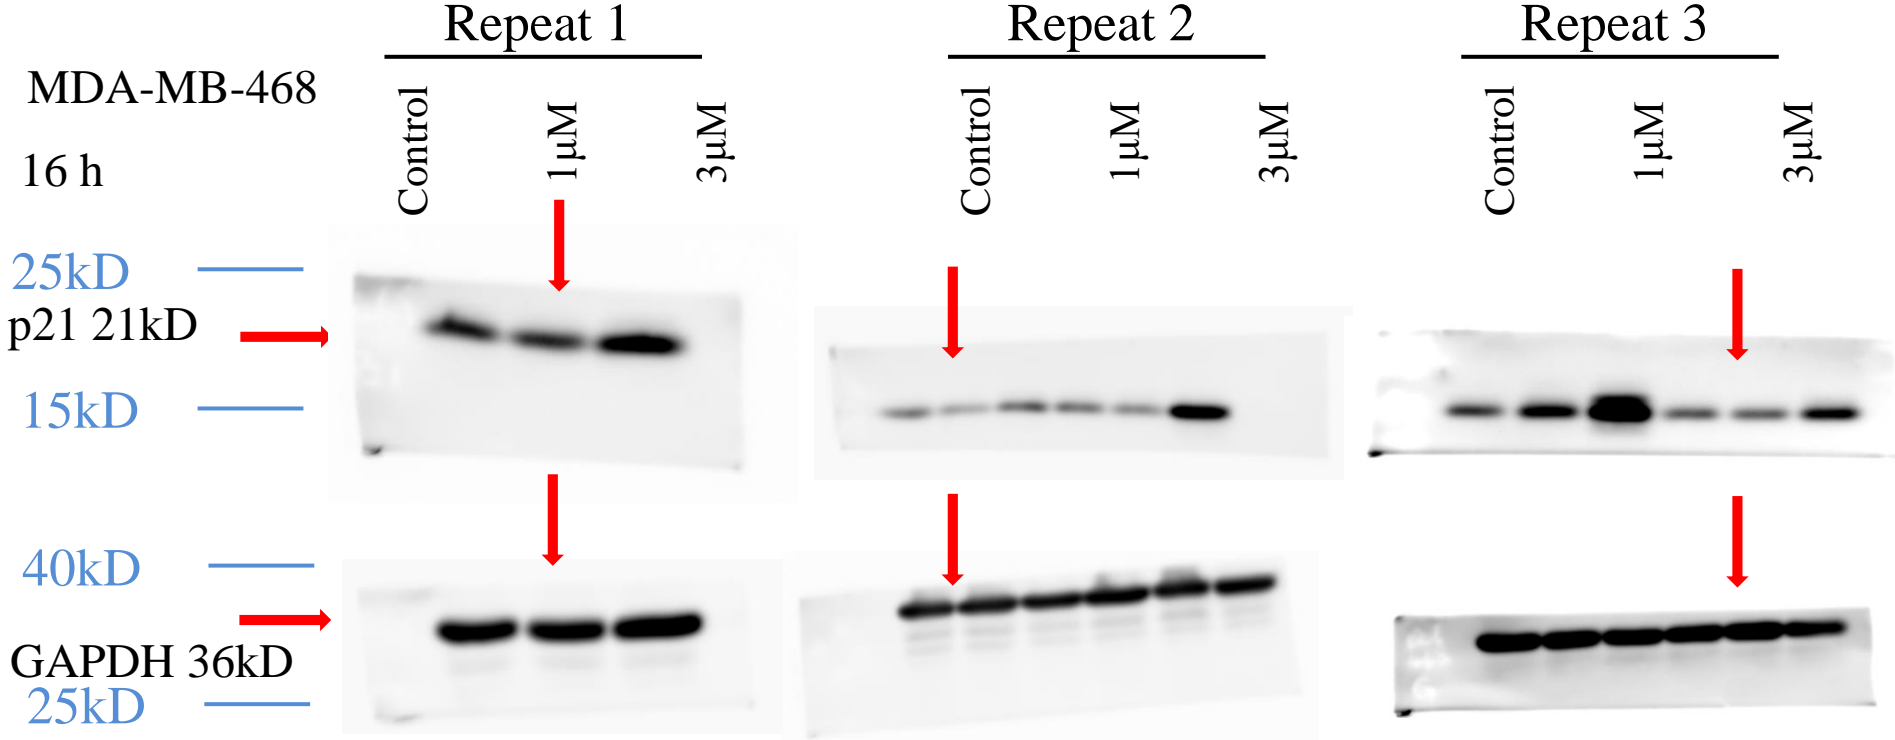

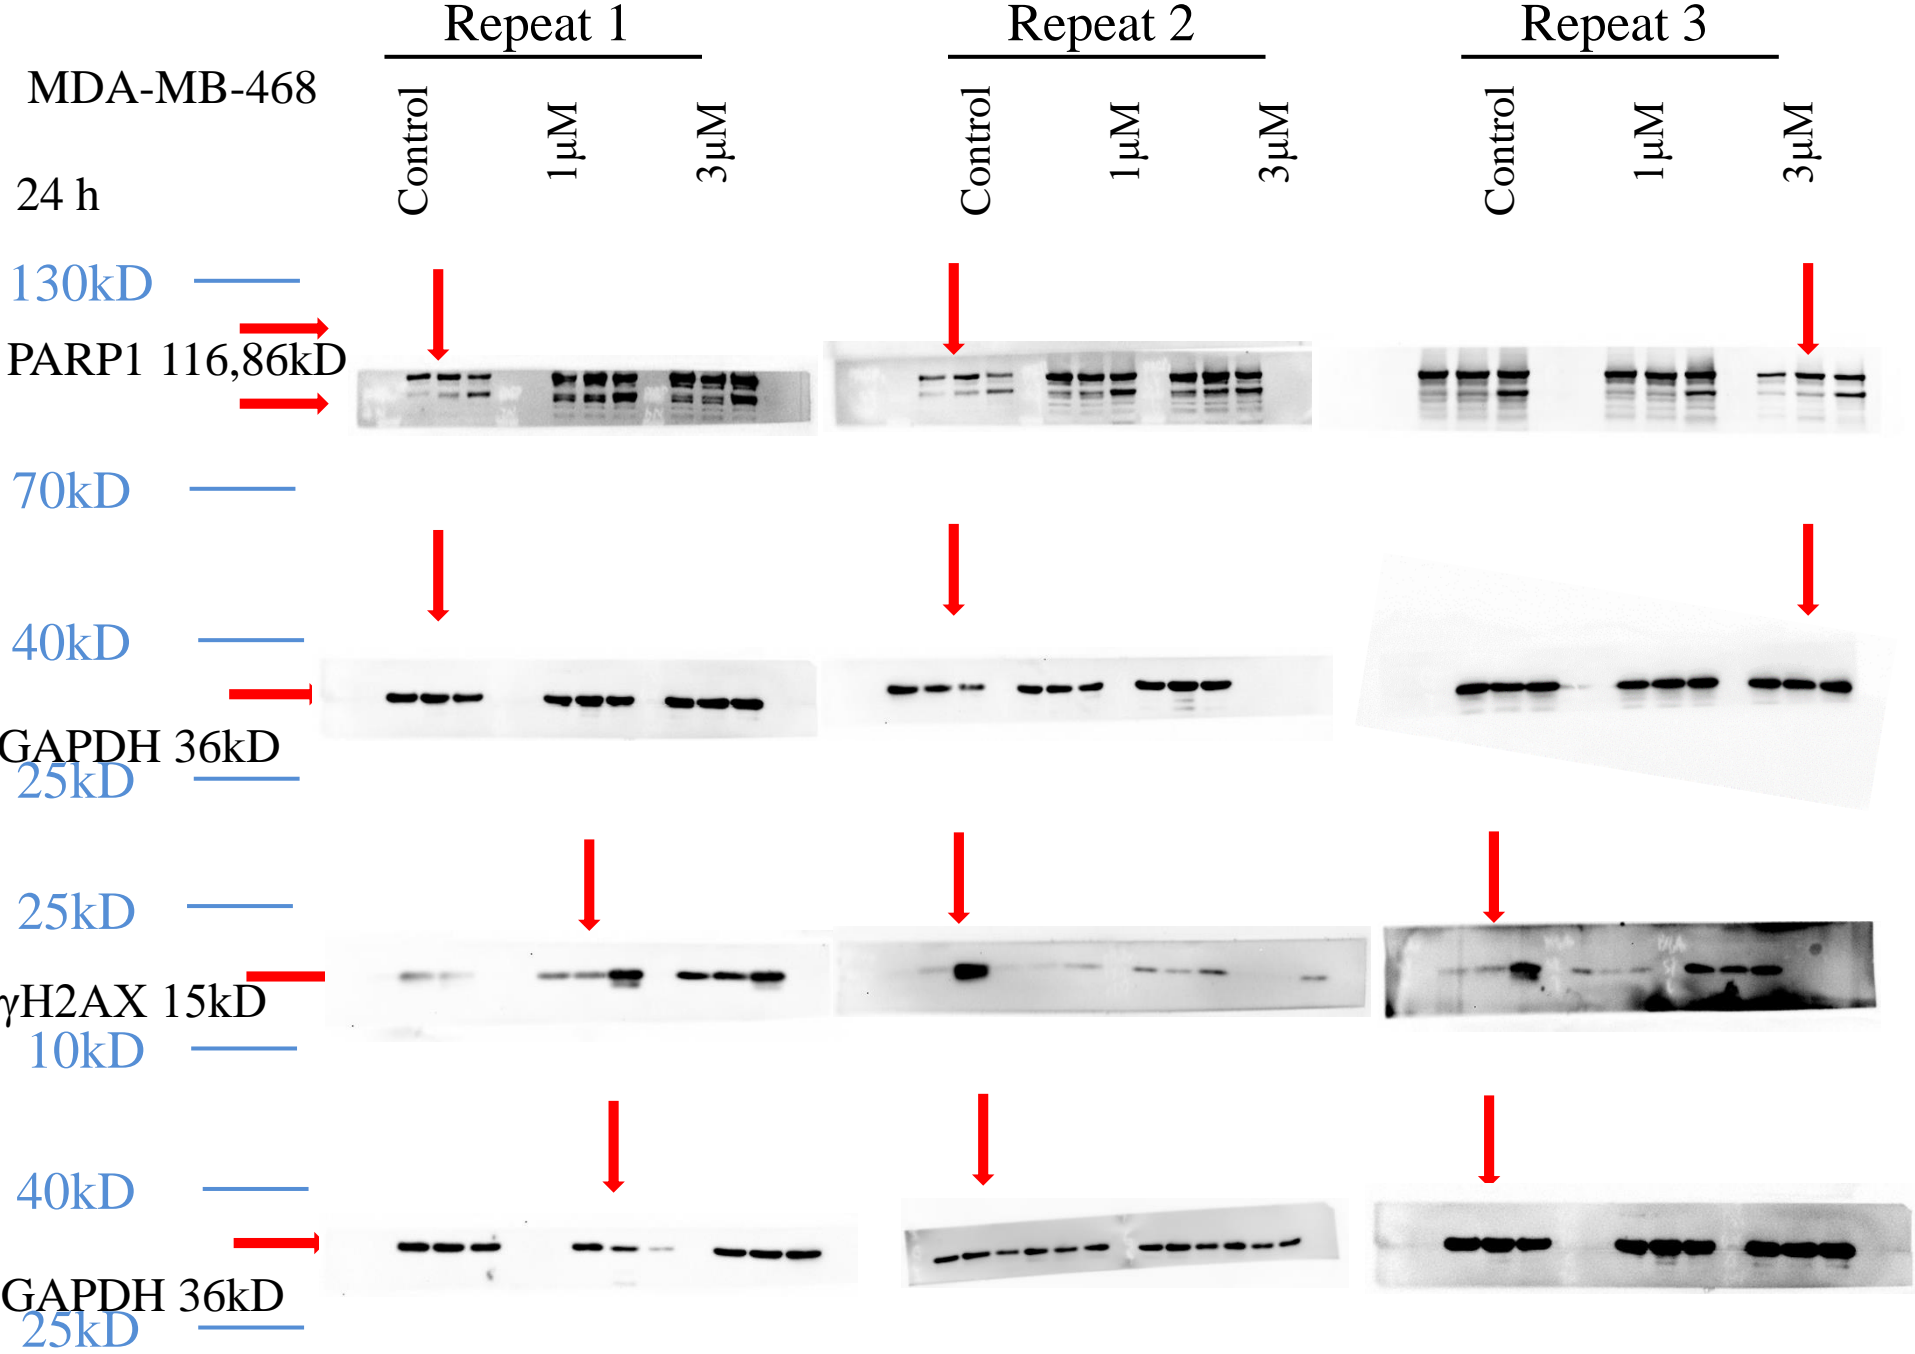

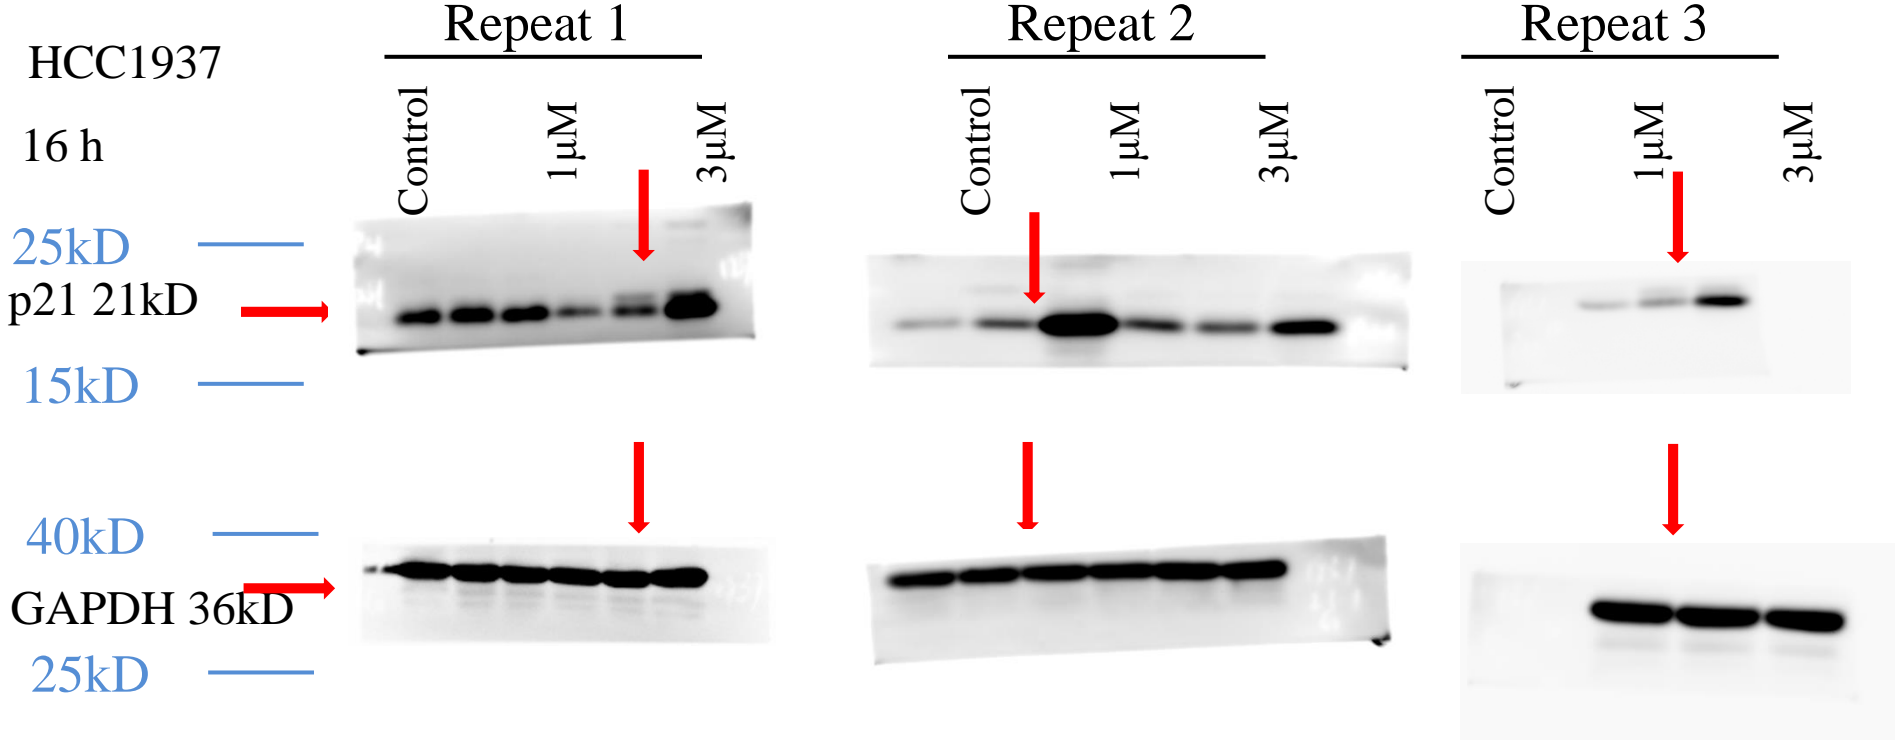

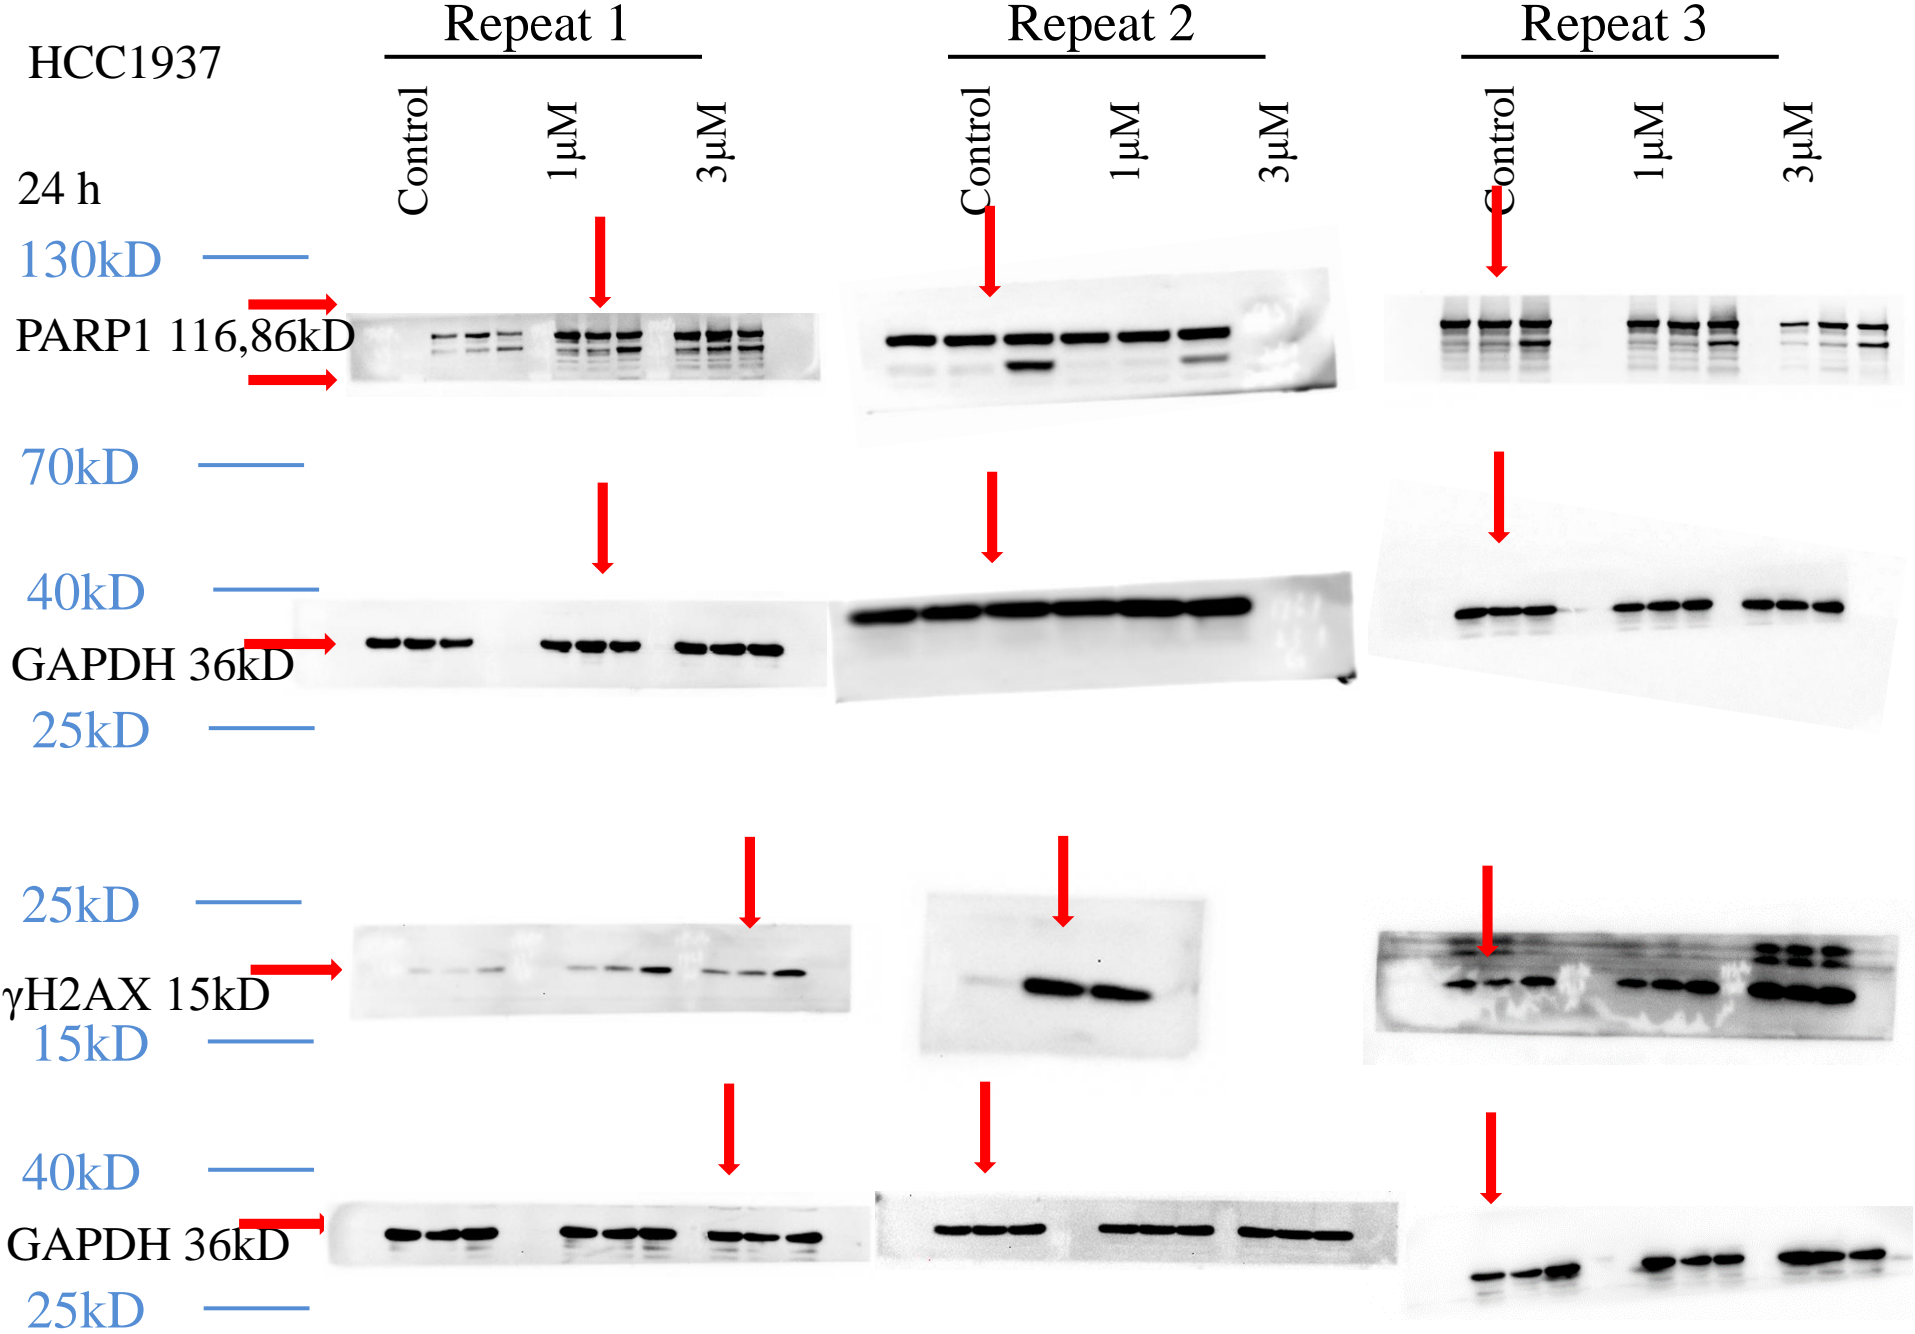

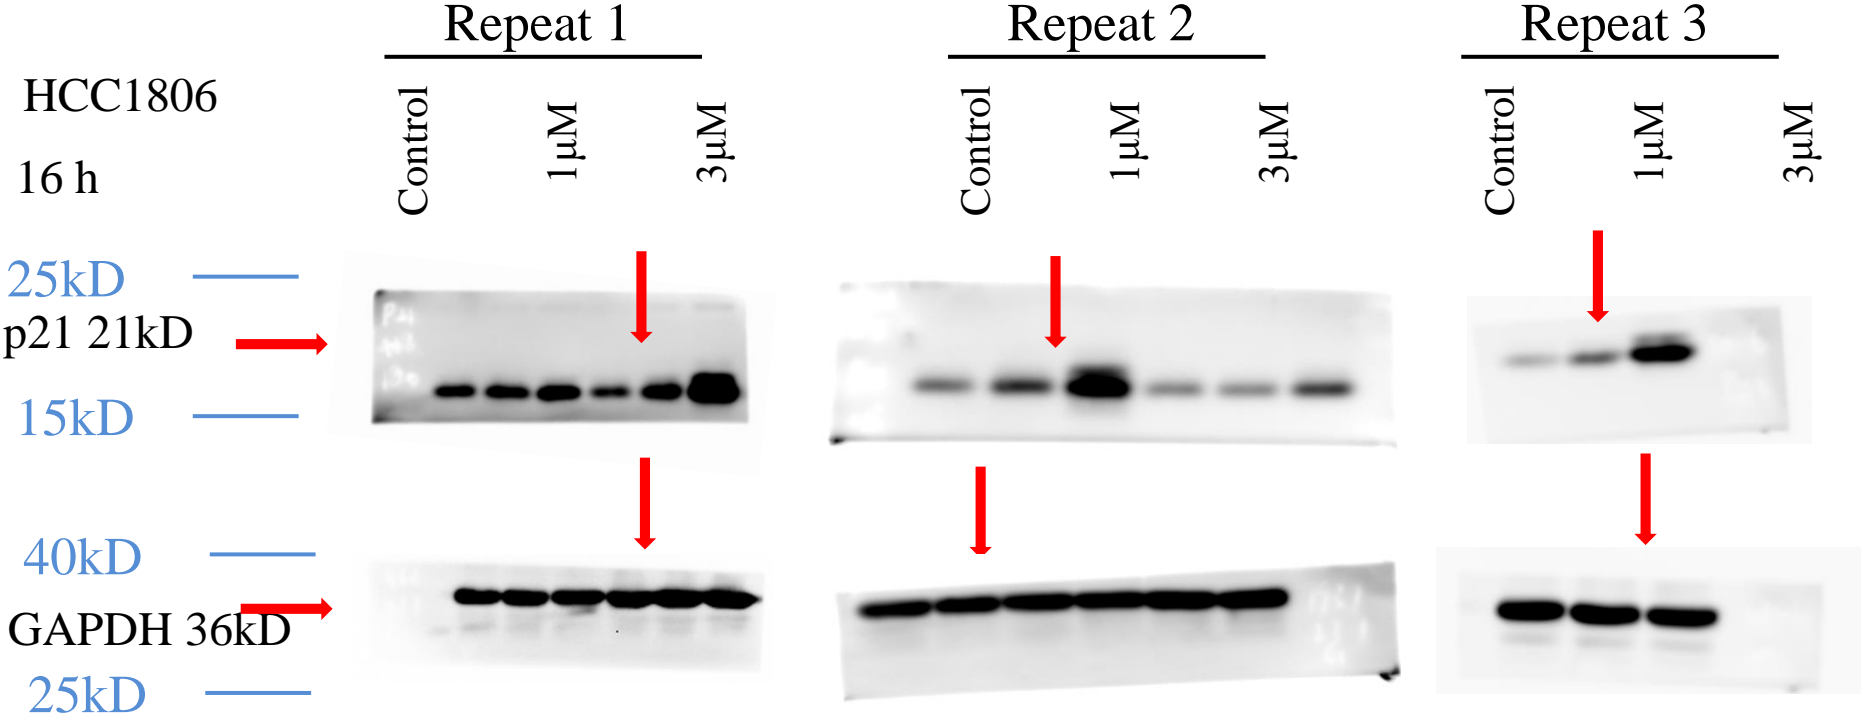

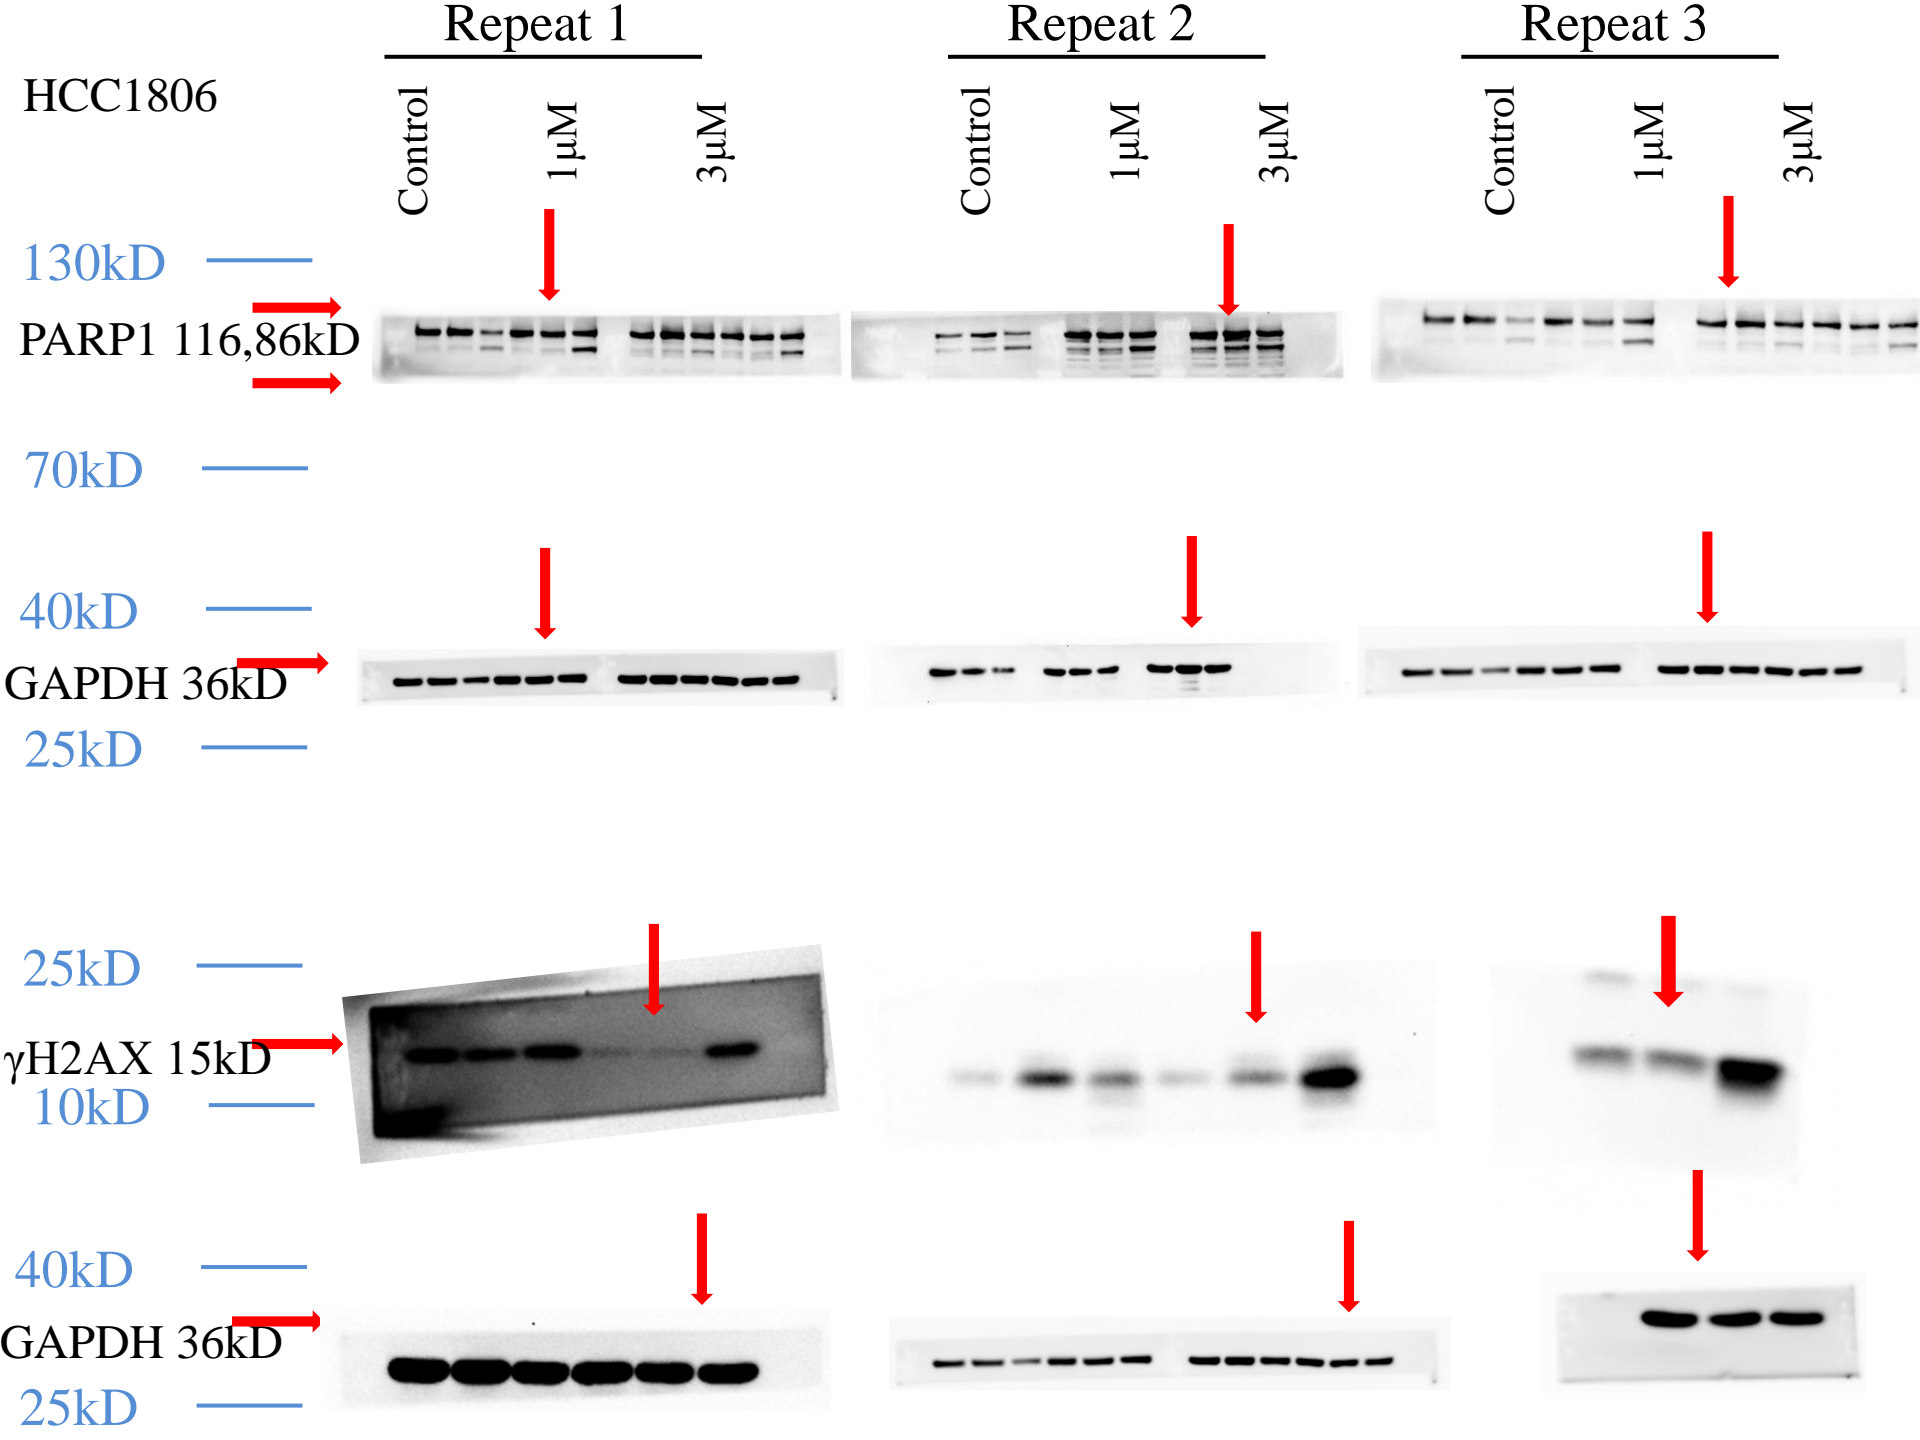

Supplement: d4md00580e1.pdf [file d4md00580e1.pdf]
